# Supplementary material for: Diastereoselective synthesis of spiro[carbazole-3,5′-pyrimidines] and spiro[carbazole-3,1′-cyclohexanes] via four-component reaction
Source: Royal Society of Chemistry journal article supplement (doi:10.1039/d1ob01113h), 2021-01-01

**Diastereoselective Synthesis of Spiro[carbazole-3,5'-pyrimidines] and  
Spiro[carbazole-3,1'-cyclohexanes] via Four-component Reaction**

Shao-Cong Zhan, Ren-Jie Fang, Jing Sun, Chao-Guo Yan \*

**Supporting Information**

|                                                                                     |                  |
|-------------------------------------------------------------------------------------|------------------|
| <b>Figures of the Single crystal structures</b>                                     | <b>s2-s5</b>     |
| <b>Single crystal data</b>                                                          | <b>s6-s9</b>     |
| <b>General procedure for the reactions</b>                                          | <b>s10-s11</b>   |
| <b><sup>1</sup>H and <sup>13</sup>C{<sup>1</sup>H} NMR spectra of all compounds</b> | <b>s12 –s115</b> |

Single crystals were grown by slow evaporation of concentrated solution in  $\text{CHCl}_3$  / DCM / EtOH (compounds **1a**, **1b**, **1c**, **1e**, **1m**, **1k'**, **2o**, **2o'**, **3b** and **4g**) in glass vials, which were then sealed by plugs with needles on them.

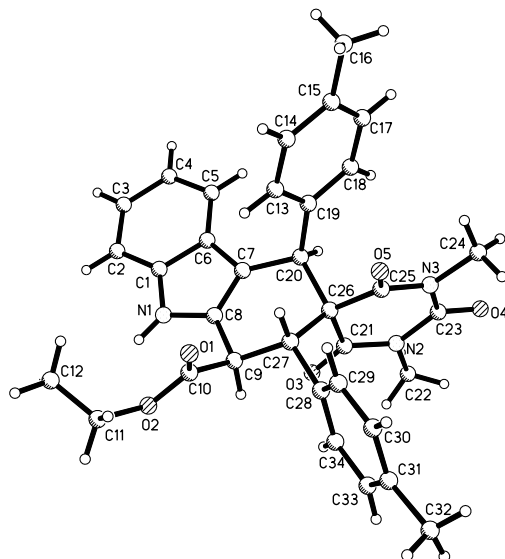

Fig. S1 ORTEP drawing (30%) of the crystal structure of **1a**

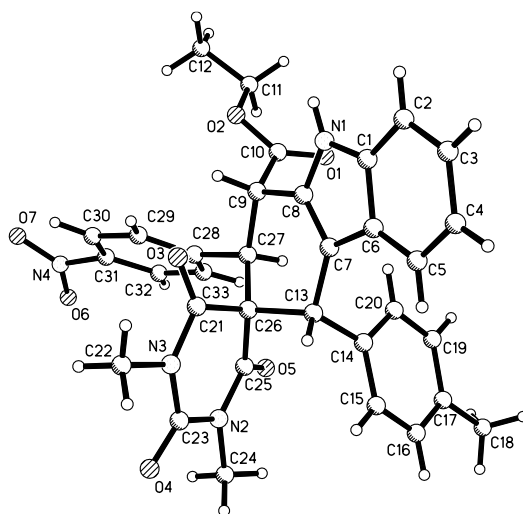

Fig. S2 ORTEP drawing (30%) of the crystal structure of **1b**

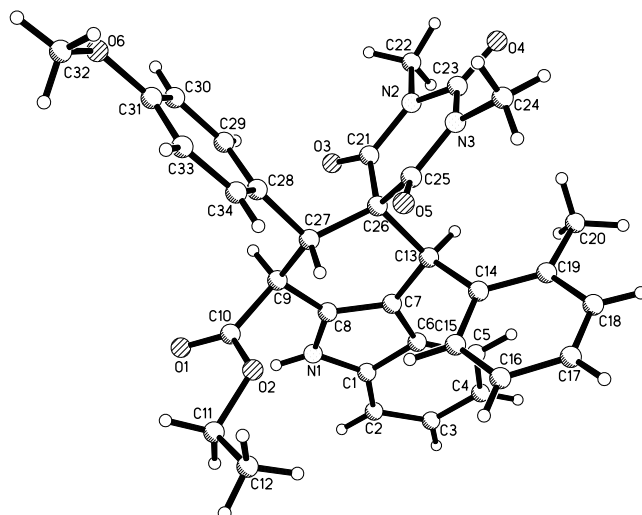

Fig. S3 ORTEP drawing (30%) of the crystal structure of **1c**

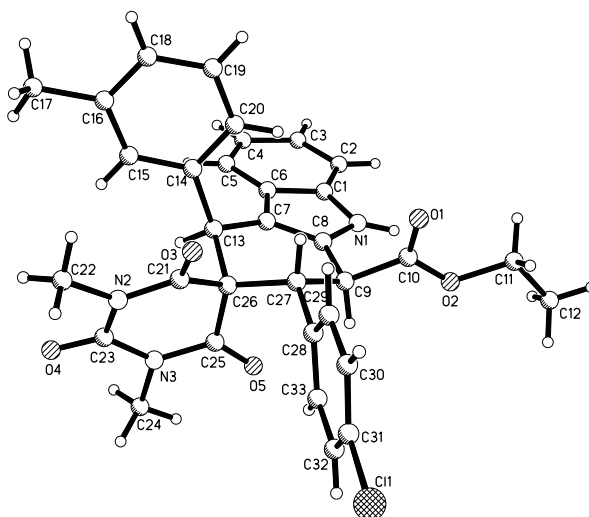

Fig. S4 ORTEP drawing (30%) of the crystal structure of **1e**

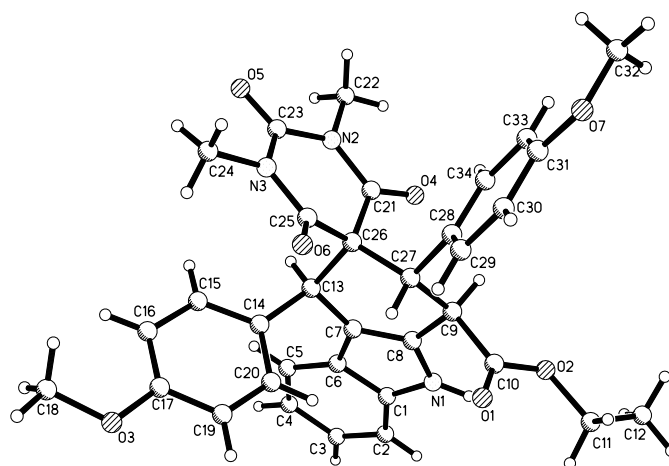

Fig. S5 ORTEP drawing (30%) of the crystal structure of **1m**

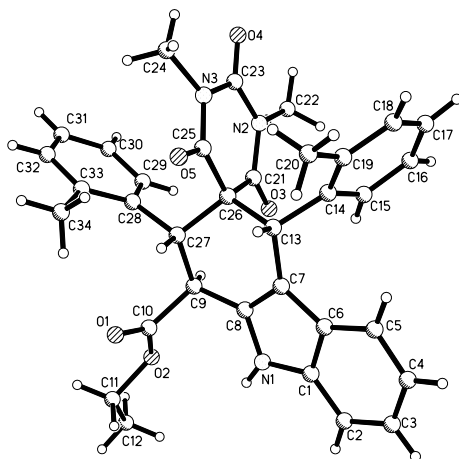

Fig. S6 ORTEP drawing (30%) of the crystal structure of **1k'**

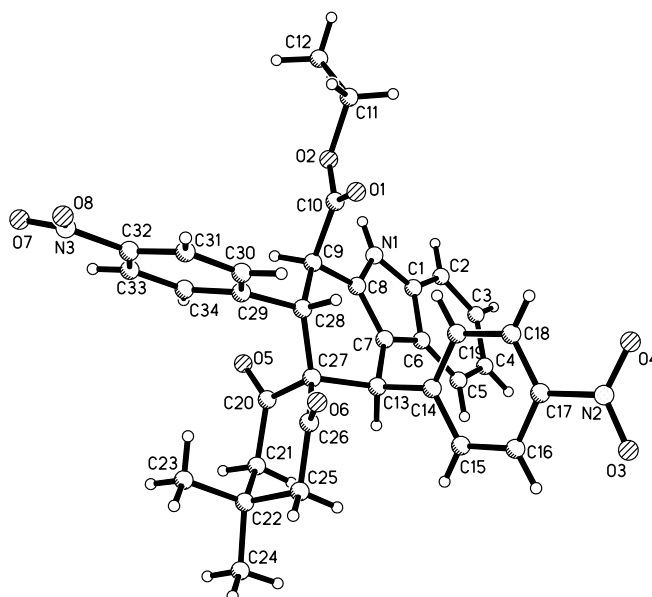

Fig. 7 ORTEP drawing (30%) of the crystal structure of **2o**

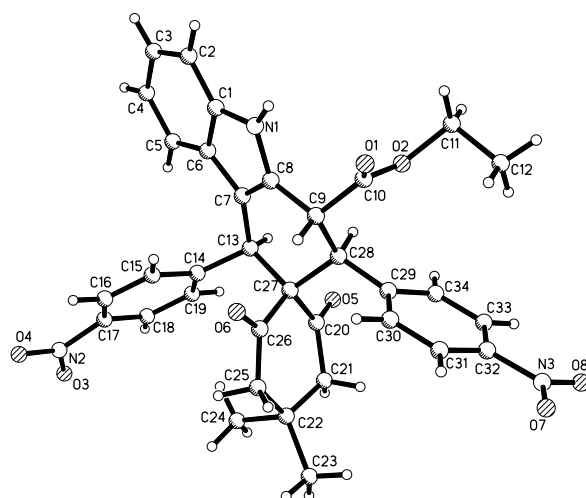

Fig. S8 ORTEP drawing (30%) of the crystal structure of **2o'**



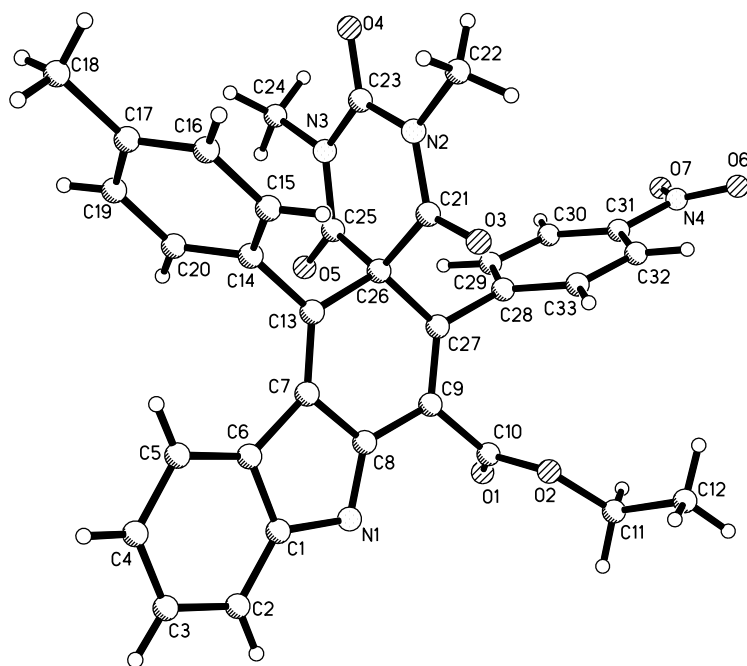

Fig. S9 ORTEP drawing (30%) of the crystal structure of **3b**

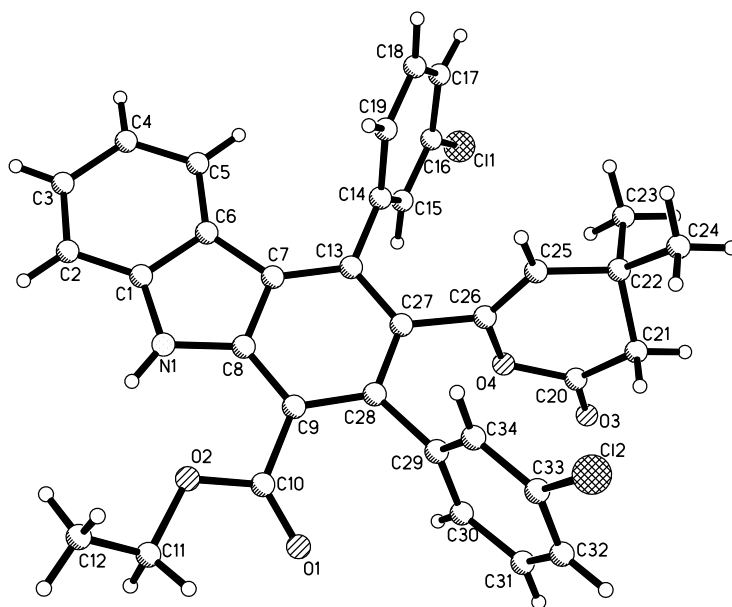

Fig.S10 ORTEP drawing (30%) of the crystal structure of **4g**

**Table S1**The single crystal data of compounds **1a**, **1b**, **1c**

| Phase                                                  | <b>1a</b>                                                        | <b>1b</b>                                                        | <b>1c</b>                                                        |
|--------------------------------------------------------|------------------------------------------------------------------|------------------------------------------------------------------|------------------------------------------------------------------|
| Empirical formula                                      | C <sub>34</sub> H <sub>33</sub> N <sub>3</sub> O <sub>5</sub>    | C <sub>33</sub> H <sub>30</sub> N <sub>4</sub> O <sub>7</sub>    | C <sub>34</sub> H <sub>33</sub> N <sub>3</sub> O <sub>6</sub>    |
| Formula weight                                         | 563.63                                                           | 594.61                                                           | 579.63                                                           |
| Temperature/K                                          | 296(2) K                                                         | 296(2) K                                                         | 296(2) K                                                         |
| Wavelength/ Å                                          | 0.71073                                                          | 0.71073                                                          | 0.71073                                                          |
| Crystal system                                         | Triclinic                                                        | Triclinic                                                        | Monoclinic                                                       |
| Space group                                            | P-1                                                              | P-1                                                              | P2(1)/n                                                          |
| <i>a</i> / Å                                           | 10.0138(5)                                                       | 12.1728(16)                                                      | 11.3100(8)                                                       |
| <i>b</i> / Å                                           | 11.7765(6)                                                       | 13.4083(18)                                                      | 9.5077(6)                                                        |
| <i>c</i> / Å                                           | 12.7363(6)                                                       | 22.278(3)                                                        | 27.4588(19)                                                      |
| $\alpha$ (°)                                           | 84.6324(15)                                                      | 86.724(4)                                                        | 90                                                               |
| $\beta$ (°)                                            | 78.1330(15)                                                      | 89.748(4)                                                        | 96.138(3)                                                        |
| $\gamma$ (°)                                           | 84.1528(16)                                                      | 78.705(4)                                                        | 90                                                               |
| <i>V</i> (Å <sup>3</sup> )                             | 1458.14(13)                                                      | 3559.7(8)                                                        | 2935.8(3)                                                        |
| <i>Z</i>                                               | 2                                                                | 4                                                                | 4                                                                |
| Calculated density (g·cm <sup>-3</sup> )               | 1.284                                                            | 1.109                                                            | 1.311                                                            |
| Absorption coefficient(mm <sup>-1</sup> )              | 0.087                                                            | 0.079                                                            | 0.091                                                            |
| <i>F</i> (000)                                         | 596                                                              | 1248                                                             | 1224                                                             |
| $\theta$ range / (°)                                   | 2.086 to 25.998 deg.                                             | 1.931 to 25.998 deg.                                             | 2.268 to 25.998                                                  |
| Limiting indices                                       | -12<= <i>h</i> <=12, -14<= <i>k</i> <=14,<br>-15<= <i>l</i> <=15 | -15<= <i>h</i> <=14, -16<= <i>k</i> <=16,<br>-27<= <i>l</i> <=27 | -13<= <i>h</i> <=13,<br>-10<= <i>k</i> <=11, -33<= <i>l</i> <=33 |
| Reflections collected/unique                           | 20829 / 5718<br>[R(int) = 0.0311]                                | 47241 / 13916<br>[R(int) = 0.1627]                               | 26618 / 5756<br>[R(int) = 0.0744]                                |
| Completeness to theta                                  | 99.6 %                                                           | 99.5 %                                                           | 99.9 %                                                           |
| Max. and min. transmission                             | 0.7456 and 0.6875                                                | 0.7456 and 0.5936                                                | 0.7456 and 0.6830                                                |
| Refinement method                                      | Full-matrix<br>least-squares on F <sup>2</sup>                   | Full-matrix<br>least-squares on F <sup>2</sup>                   | Full-matrix<br>least-squares on F <sup>2</sup>                   |
| Data/restraints/parameters                             | 5718 / 0 / 384                                                   | 13916 / 0 / 801                                                  | 5756 / 0 / 404                                                   |
| Goodness-of-fit on <i>F</i> <sup>2</sup>               | 1.028                                                            | 1.020                                                            | 1.020                                                            |
| Final <i>R</i> indices[I>2sigma(I)]                    | R1 = 0.0512, wR2 = 0.1208                                        | R1 = 0.0987, wR2 = 0.2202                                        | R1 = 0.0625, wR2 = 0.1231                                        |
| <i>R</i> indices (all data)                            | R1 = 0.0792, wR2 = 0.1367                                        | R1 = 0.2259, wR2 = 0.2709                                        | R1 = 0.1611, wR2 = 0.1568                                        |
| Largest diff. peak and hole<br>/(e · Å <sup>-3</sup> ) | 0.218 and -0.265                                                 | 0.606 and -0.342                                                 | 0.185 and -0.164                                                 |

**Table S1**The single crystal data of compounds **1e**, **1m**, **1k'**

| Phase                                                  | <b>1e</b>                                                       | <b>1m</b>                                                        | <b>1k'</b>                                                       |
|--------------------------------------------------------|-----------------------------------------------------------------|------------------------------------------------------------------|------------------------------------------------------------------|
| Empirical formula                                      | C <sub>33</sub> H <sub>30</sub> ClN <sub>3</sub> O <sub>5</sub> | C <sub>34</sub> H <sub>33</sub> N <sub>3</sub> O <sub>7</sub>    | C <sub>34</sub> H <sub>33</sub> N <sub>3</sub> O <sub>5</sub>    |
| Formula weight                                         | 584.05                                                          | 595.63                                                           | 563.63                                                           |
| Temperature/K                                          | 296(2) K                                                        | 296(2) K                                                         | 296(2) K                                                         |
| Wavelength/ Å                                          | 0.71073                                                         | 0.71073                                                          | 0.71073                                                          |
| Crystal system                                         | Monoclinic                                                      | Monoclinic                                                       | Monoclinic                                                       |
| Space group                                            | P2(1)/n                                                         | P2(1)/n                                                          | P2(1)/c                                                          |
| <i>a</i> / Å                                           | 8.6348(3)                                                       | 8.8520(7)                                                        | 17.6658(12)                                                      |
| <i>b</i> / Å                                           | 17.8206(7)                                                      | 18.3198(15)                                                      | 12.4540(8)                                                       |
| <i>c</i> / Å                                           | 18.8901(8)                                                      | 18.4779(17)                                                      | 26.766(2)                                                        |
| $\alpha$ (°)                                           | 90                                                              | 90                                                               | 90                                                               |
| $\beta$ (°)                                            | 94.7464(13)                                                     | 95.474(3)                                                        | 95.226(2)                                                        |
| $\gamma$ (°)                                           | 90                                                              | 90                                                               | 90                                                               |
| <i>V</i> (Å <sup>3</sup> )                             | 2896.8(2)                                                       | 2982.8(4)                                                        | 5864.3(7)                                                        |
| <i>Z</i>                                               | 4                                                               | 4                                                                | 8                                                                |
| Calculated density (g·cm <sup>-3</sup> )               | 1.339                                                           | 1.326                                                            | 1.277                                                            |
| Absorption coefficient(mm <sup>-1</sup> )              | 0.179                                                           | 0.094                                                            | 0.086                                                            |
| <i>F</i> (000)                                         | 1224                                                            | 1256                                                             | 2384                                                             |
| $\theta$ range / (°)                                   | 2.164 to 25.997 deg.                                            | 2.214 to 25.998                                                  | 1.528 to 25.999 deg.                                             |
| Limiting indices                                       | -10<= <i>h</i> <=9, -21<= <i>k</i> <=21,<br>-20<= <i>l</i> <=23 | -10<= <i>h</i> <=10,<br>-22<= <i>k</i> <=22, -20<= <i>l</i> <=22 | -21<= <i>h</i> <=21, -15<= <i>k</i> <=15,<br>-32<= <i>l</i> <=33 |
| Reflections collected/unique                           | 27001 / 5683<br>[R(int) = 0.0352]                               | 27845 / 5836<br>[R(int) = 0.1304]                                | 59155 / 11530<br>[R(int) = 0.1698]                               |
| Completeness to theta                                  | 99.6 %                                                          | 99.8 %                                                           | 99.9 %                                                           |
| Max. and min. transmission                             | 0.7456 and 0.7042                                               | 0.7456 and 0.5371                                                | 0.7456 and 0.6887                                                |
| Refinement method                                      | Full-matrix<br>least-squares on F <sup>2</sup>                  | Full-matrix<br>least-squares on F <sup>2</sup>                   | Full-matrix<br>least-squares on F <sup>2</sup>                   |
| Data/restraints/parameters                             | 5683 / 48 / 383                                                 | 5836 / 0 / 402                                                   | 11530 / 396 / 767                                                |
| Goodness-of-fit on <i>F</i> <sup>2</sup>               | 1.034                                                           | 1.004                                                            | 1.022                                                            |
| Final <i>R</i> indices[I>2sigma(I)]                    | R1 = 0.0487, wR2 = 0.1118                                       | R1 = 0.0681, wR2 = 0.1163                                        | R1 = 0.1063, wR2 = 0.2190                                        |
| <i>R</i> indices (all data)                            | R1 = 0.0792, wR2 = 0.1278                                       | R1 = 0.2193, wR2 = 0.1593                                        | R1 = 0.2613, wR2 = 0.2918                                        |
| Largest diff. peak and hole<br>/(e · Å <sup>-3</sup> ) | 0.328 and -0.516                                                | 0.197 and -0.188                                                 | 0.527 and -0.702                                                 |

**Table S2**The single crystal data of compounds **2o**, **2o'**

| Phase                                                  | <b>2o</b>                                                        | <b>2o'</b>                                                       |
|--------------------------------------------------------|------------------------------------------------------------------|------------------------------------------------------------------|
| Empirical formula                                      | C <sub>34</sub> H <sub>31</sub> N <sub>3</sub> O <sub>8</sub>    | C <sub>34</sub> H <sub>31</sub> N <sub>3</sub> O <sub>8</sub>    |
| Formula weight                                         | 609.62                                                           | 609.62                                                           |
| Temperature/K                                          | 296(2) K                                                         | 296(2) K                                                         |
| Wavelength/ Å                                          | 0.71073                                                          | 0.71073                                                          |
| Crystal system                                         | Monoclinic                                                       | Triclinic                                                        |
| Space group                                            | P2(1)/n                                                          | P-1                                                              |
| <i>a</i> / Å                                           | 13.3152(19)                                                      | 10.8318(6)                                                       |
| <i>b</i> / Å                                           | 11.0682(15)                                                      | 11.4013(7)                                                       |
| <i>c</i> / Å                                           | 20.681                                                           | 15.4837(8)                                                       |
| $\alpha$ (°)                                           | 90.000(4)                                                        | 105.432(2)                                                       |
| $\beta$ (°)                                            | 96.176(4)                                                        | 103.175(2)                                                       |
| $\gamma$ (°)                                           | 90                                                               | 103.079(2)                                                       |
| <i>V</i> (Å <sup>3</sup> )                             | 3030.2(6)                                                        | 1708.79(17)                                                      |
| <i>Z</i>                                               | 4                                                                | 2                                                                |
| Calculated density (g·cm <sup>-3</sup> )               | 1.336                                                            | 1.185                                                            |
| Absorption coefficient(mm <sup>-1</sup> )              | 0.096                                                            | 0.085                                                            |
| <i>F</i> (000)                                         | 1280                                                             | 640                                                              |
| $\theta$ range / (°)                                   | 2.090 to 25.999                                                  | 1.946 to 25.999                                                  |
| Limiting indices                                       | -16<= <i>h</i> <=16,<br>-13<= <i>k</i> <=13, -25<= <i>l</i> <=20 | -13<= <i>h</i> <=13,<br>-14<= <i>k</i> <=14, -19<= <i>l</i> <=17 |
| Reflections collected/unique                           | 23239 / 5934<br>[R(int) = 0.2259]                                | 17530 / 6537<br>[R(int) = 0.0475]                                |
| Completeness to theta                                  | 99.5 %                                                           | 97.3 %                                                           |
| Max. and min. transmission                             | 0.7456 and 0.6561                                                | 0.7456 and 0.6729                                                |
| Refinement method                                      | Full-matrix<br>least-squares on F <sup>2</sup>                   | Full-matrix<br>least-squares on F <sup>2</sup>                   |
| Data/restraints/parameters                             | 5934 / 23 / 421                                                  | 6537 / 205 / 478                                                 |
| Goodness-of-fit on <i>F</i> <sup>2</sup>               | 1.117                                                            | 1.024                                                            |
| Final <i>R</i> indices[I>2sigma(I)]                    | R1 = 0.1208, wR2 = 0.2225                                        | R1 = 0.0946, wR2 = 0.2299                                        |
| <i>R</i> indices (all data)                            | R1 = 0.1741, wR2 = 0.2476                                        | R1 = 0.1818, wR2 = 0.2804                                        |
| Largest diff. peak and hole<br>/(e · Å <sup>-3</sup> ) | 0.324 and -0.341                                                 | 0.563 and -0.857                                                 |

**Table S3**The single crystal data of compounds **3b**, **4g**

| Phase                                                | <b>3b</b>                                                        | <b>4g</b>                                                        |
|------------------------------------------------------|------------------------------------------------------------------|------------------------------------------------------------------|
| Empirical formula                                    | C <sub>33</sub> H <sub>26</sub> N <sub>4</sub> O <sub>7</sub>    | C <sub>34</sub> H <sub>27</sub> Cl <sub>2</sub> NO <sub>4</sub>  |
| Formula weight                                       | 590.58                                                           | 584.46                                                           |
| Temperature/K                                        | 273(2) K                                                         | 296(2) K                                                         |
| Wavelength/ Å                                        | 0.71073                                                          | 0.71073                                                          |
| Crystal system                                       | Triclinic                                                        | Triclinic                                                        |
| Space group                                          | P-1                                                              | P-1                                                              |
| <i>a</i> / Å                                         | 8.9596(5)                                                        | 10.7954(11)                                                      |
| <i>b</i> / Å                                         | 9.3710(6)                                                        | 11.0062(10)                                                      |
| <i>c</i> / Å                                         | 19.8144(11)                                                      | 13.5566(12)                                                      |
| $\alpha$ (°)                                         | 99.2210(18)                                                      | 68.256(3)                                                        |
| $\beta$ (°)                                          | 100.1718(17)                                                     | 87.382(3)                                                        |
| $\gamma$ (°)                                         | 96.4144(19)                                                      | 86.599(3)                                                        |
| <i>V</i> (Å <sup>3</sup> )                           | 1599.44(16)                                                      | 1493.0(2)                                                        |
| <i>Z</i>                                             | 2                                                                | 2                                                                |
| Calculated density (g·cm <sup>-3</sup> )             | 1.226                                                            | 1.300                                                            |
| Absorption coefficient(mm <sup>-1</sup> )            | 0.088                                                            | 0.256                                                            |
| <i>F</i> (000)                                       | 616                                                              | 608                                                              |
| $\theta$ range / (°)                                 | 2.125 to 25.995                                                  | 2.053 to 25.996                                                  |
| Limiting indices                                     | -10<= <i>h</i> <=11, -11<= <i>k</i> <=11,<br>-24<= <i>l</i> <=24 | -13<= <i>h</i> <=13, -13<= <i>k</i> <=13,<br>-16<= <i>l</i> <=16 |
| Reflections collected/unique                         | 22802 / 6250<br>[R(int) = 0.0351]                                | 21316 / 5862<br>[R(int) = 0.0432]                                |
| Completeness to theta                                | 99.5 %                                                           | 99.8 %                                                           |
| Max. and min. transmission                           | 0.7456 and 0.6860                                                | 0.7456 and 0.6956                                                |
| Refinement method                                    | Full-matrix<br>least-squares on F <sup>2</sup>                   | Full-matrix<br>least-squares on F <sup>2</sup>                   |
| Data/restraints/parameters                           | 6250 / 15 / 402                                                  | 5862 / 0 / 373                                                   |
| Goodness-of-fit on <i>F</i> <sup>2</sup>             | 1.015                                                            | 1.034                                                            |
| Final <i>R</i> indices [I>2sigma(I)]                 | R1 = 0.0602, wR2 = 0.1498                                        | R1 = 0.0788, wR2 = 0.2039                                        |
| <i>R</i> indices (all data)                          | R1 = 0.0960, wR2 = 0.1709                                        | R1 = 0.1288, wR2 = 0.2348                                        |
| Largest diff. peak and hole<br>/(e·Å <sup>-3</sup> ) | 0.424 and -0.347                                                 | 1.021 and -0.567                                                 |

## Experimental section

Unless noted, the commercial reagents and solvents were used without further purification. Melting points were recorded with a micromelting point apparatus and are uncorrected. IR spectra were recorded using a Bruker Tensor 27 spectrometer (KBr disc). The  $^1\text{H}$  and  $^{13}\text{C}\{^1\text{H}\}$  NMR spectra were recorded with a Varian 400 spectrometer at 400 or 100 MHz. High-resolution mass spectra (HRMS) were recorded in ESI mode using a MicroTOF mass spectrometer. Single-crystal X-ray data were collected with a Bruker Smart APEX-2 CCD diffractometer. All reactions were monitored by thin-layer chromatography (TLC) using silica gel plates (silica gel 60 F254 0.25 mm), and components were monitored by observation under UV light (254 and 365 nm).

- 1. General procedures for the Synthesis of functionalized spiro[carbazole-3,5'-pyrimidines] spiro[carbazole-2,4'-pyrazoles] via three-component reaction:** A mixture of indole-2-acetate (0.5 mmol), aldehyde (0.6 mmol) and 2-arylidene-1,3'-dimethylbarbituric acid (0.5 mmol) in dry toluene (6.0 mL) was stirred at 110°C for three hours. After removing the solvent by evaporating at reduced pressure, the residue was subjected to column chromatography with ethyl acetate and light petroleum (V/V=1:5-1:8) to give pure **1a-1j** and **1a'-1j'**.
- 2. General procedures for the Synthesis of functionalized spiro[carbazole-3,5'-pyrimidines] spiro[carbazole-2,4'-pyrazoles] via four-component reaction:** A mixture of indole-2-acetate (0.5 mmol), aldehyde (1.0 mmol) and 1,3'-dimethylbarbituric acid (0.5 mmol) in dry toluene (6.0 mL) was stirred at 110°C for three hours. After removing the solvent by evaporating at reduced pressure, the residue was subjected to column chromatography with ethyl acetate and light petroleum (V/V=1:5-1:8) to give pure **1k-1r** and **1k'-1r'**.
- 3. General procedures for the Synthesis of functionalized spiro[carbazole-3,1'-cyclohexanes]**

**via four-component reaction:** A mixture of indole-2-acetate (0.5 mmol), aromatic aldehyde (1.0 mmol) and cyclohexane-1,3-dione or dimedone (0.5 mmol) in dry toluene (6.0 mL) was stirred at 110°C for three hours. After removing the solvent by evaporating at reduced pressure, the residue was subjected to column chromatography with ethyl acetate and light petroleum (V/V=1:4-1:8) to give pure **2a-2o** and **2a'-2o'**.

#### 4. **General procedures for the Synthesis of functionalized spiro[carbazole-3,5'-pyrimidines]**

**3a-3d:** A mixture of indole-2-acetate (0.5 mmol), aldehyde (0.6 mmol) and 2-arylidene-1,3'-dimethylbarbituric acid (0.5 mmol) in dry toluene (6.0 mL) was stirred at 110°C for three hours. After removing the solvent by evaporating at reduced pressure, DDQ (1.0 mmol) and acetonitrile (10.0 mL) was added. The suspension was stirred at room temperature for four hours. Then, the solvent was removed at reduced pressure. The residue was subjected to column chromatography with ethyl acetate and light petroleum (V/V=1:3 ~ 1:6) to give pure product **3a-3d**.

#### 5. **General procedures for the Synthesis of functionalized $\delta$ -valerolactone-substituted**

**carbazoles 4a-4g:** A mixture of indole-2-acetate (0.5 mmol), aromatic aldehyde (1.0 mmol) and cyclohexane-1,3-dione or dimedone (0.5 mmol) in dry toluene (6.0 mL) was stirred at 110°C for three hours. After removing the solvent by evaporating at reduced pressure, DDQ (1.0 mmol) and acetonitrile (10.0 mL) was added. The suspension was stirred at room temperature for four hours. Then, the solvent was removed at reduced pressure. The residue was subjected to column chromatography with ethyl acetate and light petroleum (V/V=1:3 ~ 1:6) to give pure product **4a-4g**.

## Ethyl

### *rel*-(1*R*,2*S*,4*R*)-1',3'-dimethyl-2',4',6'-trioxo-2,4-di-*p*-tolyl-1,1',2,3',4,4',6',9-octahydro-2'*H*-spiro[carbazole-3,5'-pyrimidine]-1-carboxylate (1a):

yellow solid, 70%, m.p. 206-208 °C; <sup>1</sup>H NMR (400 MHz, CDCl<sub>3</sub>) δ: 8.42 (s, 1H, NH), 7.29 (d, *J* = 8.4 Hz, 1H, ArH), 7.26-7.23 (m, 2H, ArH), 7.11-7.03 (m, 5H, ArH), 6.99-6.96 (m, 2H, ArH), 6.94-6.88 (m, 2H, ArH), 5.08 (d, *J* = 10.8 Hz, 1H, CH), 4.63 (d, *J* = 10.8 Hz, 1H, CH), 4.56 (s, 1H, CH), 4.17 (q, *J* = 7.2 Hz, 2H, CH<sub>2</sub>), 3.25 (s, 3H, CH<sub>3</sub>), 2.97 (s, 3H, CH<sub>3</sub>), 2.30 (s, 3H, CH<sub>3</sub>), 2.25 (s, 3H, CH<sub>3</sub>), 1.22 (t, *J* = 7.2 Hz, 3H, CH<sub>3</sub>); <sup>13</sup>C NMR (400 MHz, CDCl<sub>3</sub>) δ: 171.2, 169.9, 167.4, 151.0, 137.8, 137.1, 136.4, 135.9, 135.5, 130.5, 128.9, 126.4, 122.2, 119.6, 118.3, 110.9, 107.9, 61.7, 61.6, 50.1, 46.5, 41.7, 28.8, 28.7, 21.1, 20.9, 14.1; IR(KBr) ν: 3350, 3245, 3167, 3055, 2932, 2852, 2812, 1852, 1666, 1632, 1544, 1432, 1325, 1207, 1132, 1109, 978, 923, 856, 742 cm<sup>-1</sup>; MS (*m/z*): HRMS (ESI) Calcd. for C<sub>34</sub>H<sub>33</sub>N<sub>3</sub>O<sub>5</sub>([M+Na]<sup>+</sup>): 586.2312, found: 586.2301.

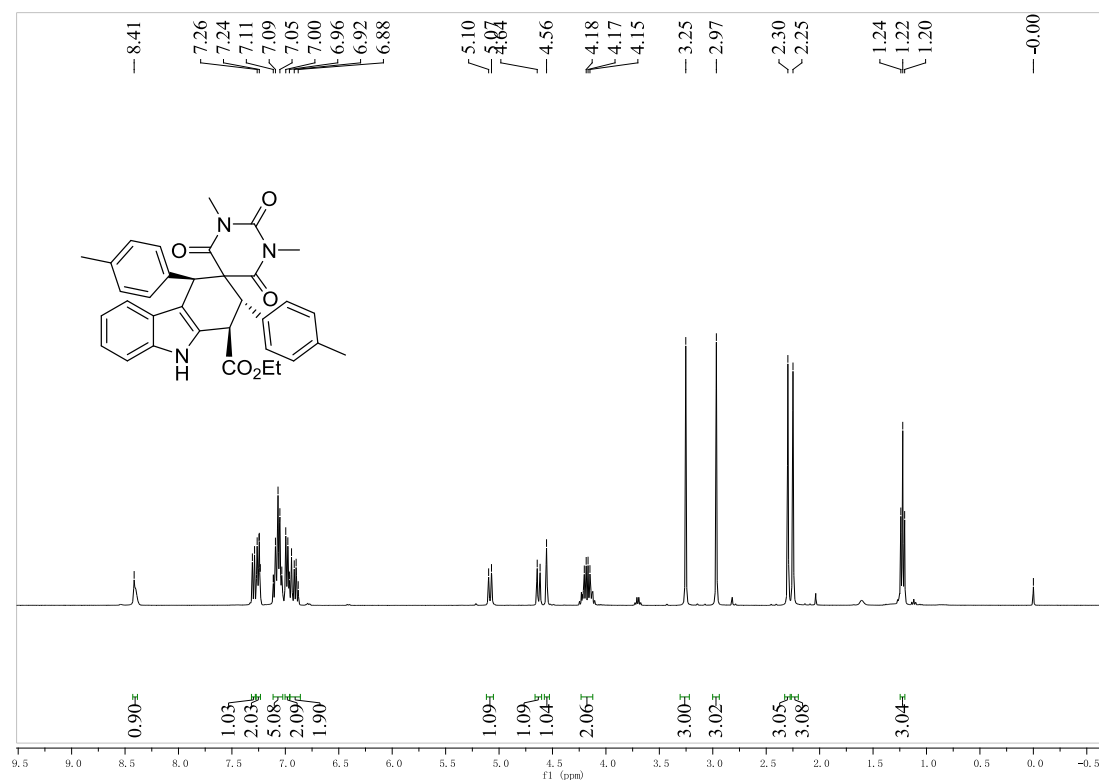



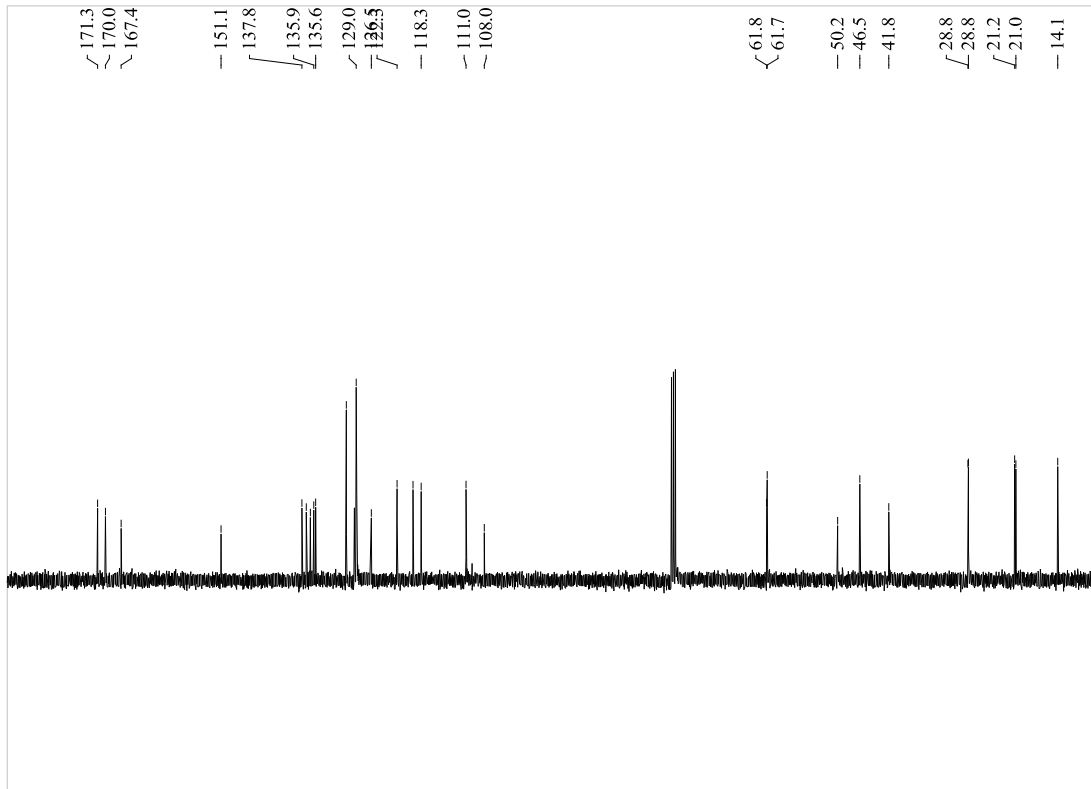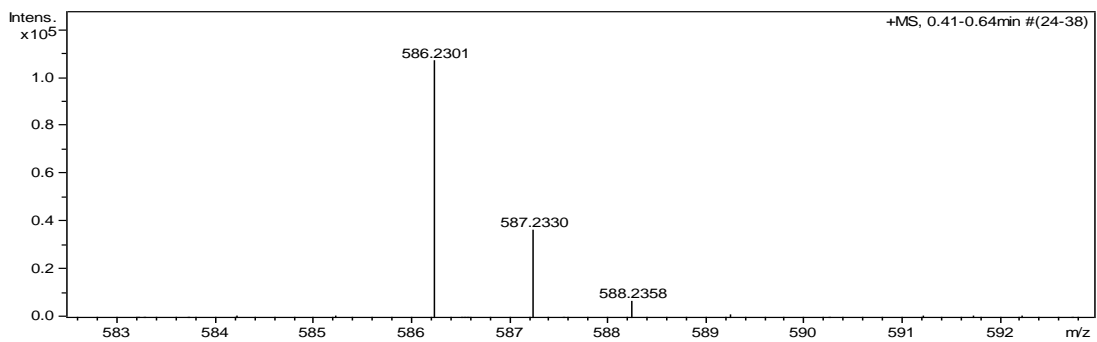

## Ethyl

### *rel*-(1*R*,2*S*,4*R*)-1',3'-dimethyl-2-(4-nitrophenyl)-2',4',6'-trioxo-4-(*p*-tolyl)-1,1',2,3',4,4',6',9-octahydro-2'*H*-spiro[carbazole-3,5'-pyrimidine]-1-carboxylate (**1b**):

yellow solid, 58%, m.p. 210-214 °C; <sup>1</sup>H NMR (400 MHz, CDCl<sub>3</sub>) δ: 8.43 (s, 1H, NH), 8.05 (d, *J* = 8.8 Hz, 2H, ArH), 7.26-7.23 (m, 2H, ArH), 7.11-7.03 (m, 5H, ArH), 6.99-6.96 (m, 2H, ArH), 6.95-6.92 (m, 2H, ArH), 5.16 (d, *J* = 10.8 Hz, 1H, CH), 4.63 (d, *J* = 10.8 Hz, 1H, CH), 4.60 (s, 1H, CH), 4.20 (q, *J* = 7.2 Hz, 2H, CH<sub>2</sub>), 3.28 (s, 3H, CH<sub>3</sub>), 2.99 (s, 3H, CH<sub>3</sub>), 2.32 (s, 3H, CH<sub>3</sub>), 1.26 (t, *J* = 7.2 Hz, 3H, CH<sub>3</sub>); <sup>13</sup>C NMR (400 MHz, CDCl<sub>3</sub>) δ: 170.5, 169.7, 167.2, 150.7, 147.2, 146.5, 138.3, 136.4, 135.1, 132.1, 129.4, 128.6, 123.2, 122.6, 119.9, 118.2, 111.0, 107.7, 62.0, 61.9, 50.7, 46.1, 41.6, 29.0, 28.9, 21.1, 14.1; IR(KBr) ν: 3390, 3275, 3234, 3167, 3049, 2932, 2852, 2836, 2014, 1853, 1672, 1613, 1554, 1489, 1367, 1289, 1145, 1112, 980, 923, 834, 742 cm<sup>-1</sup>; MS (*m/z*): HRMS (ESI) Calcd. for C<sub>33</sub>H<sub>30</sub>N<sub>4</sub>O<sub>7</sub> ([M+Na]<sup>+</sup>): 617.2007, found: 617.1997.

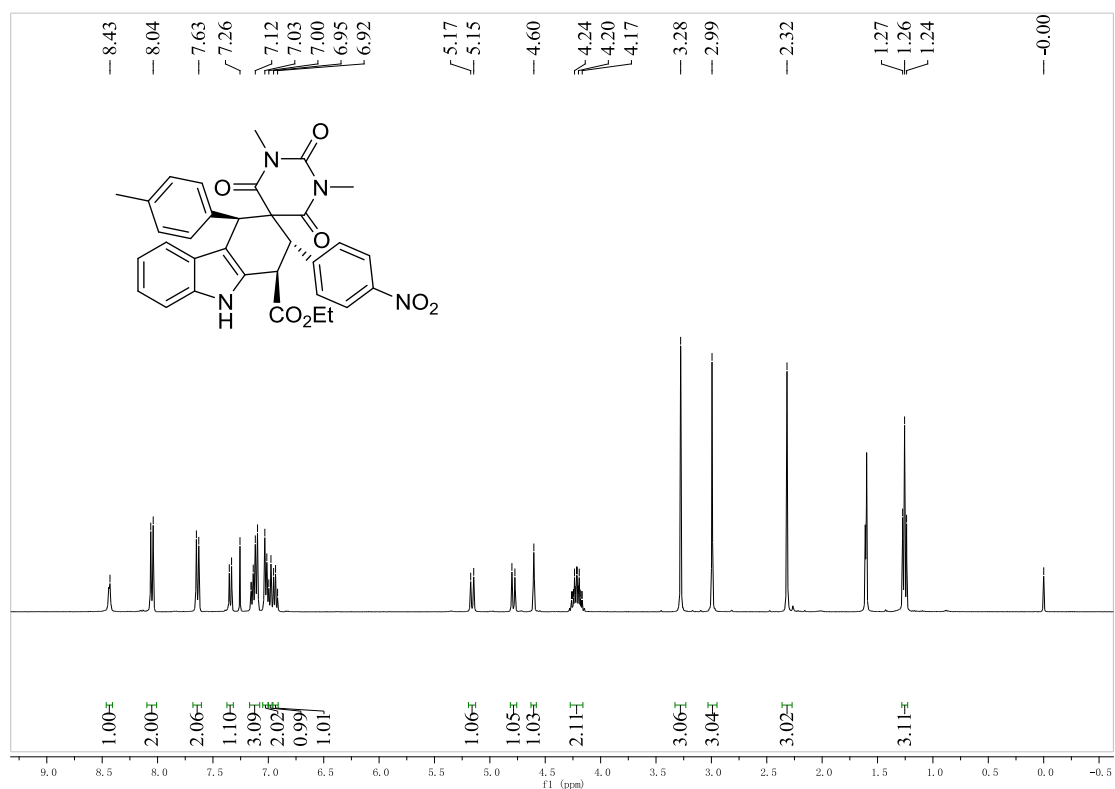

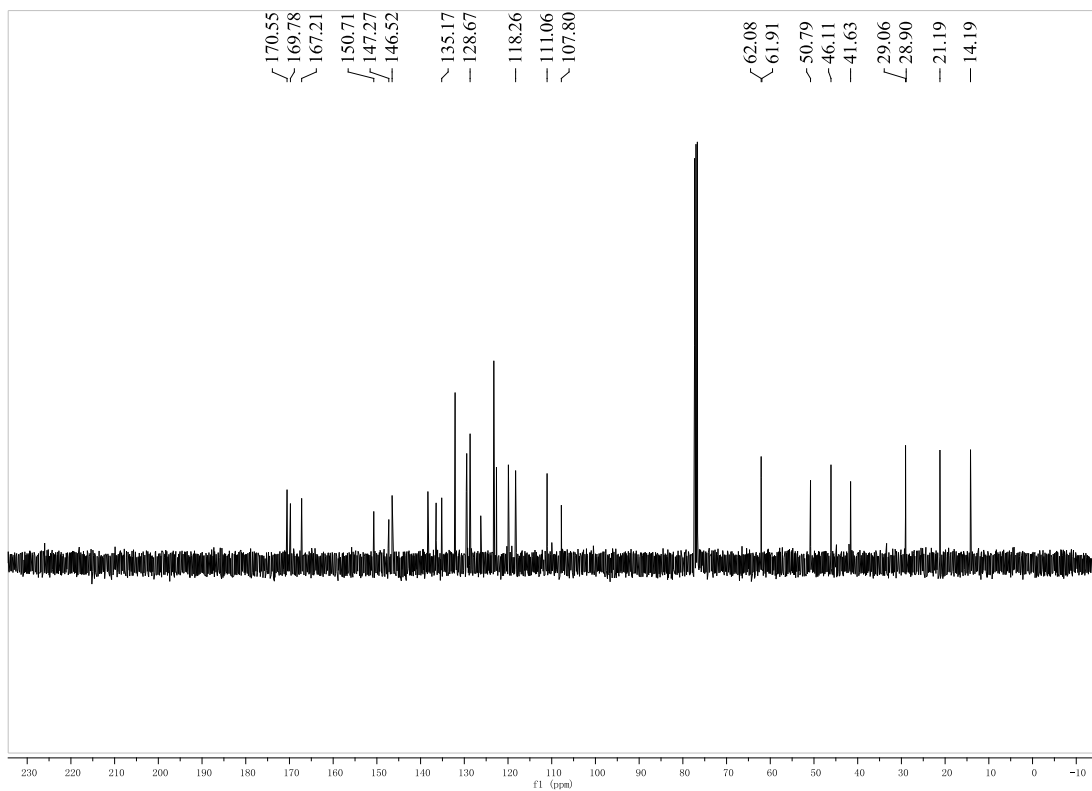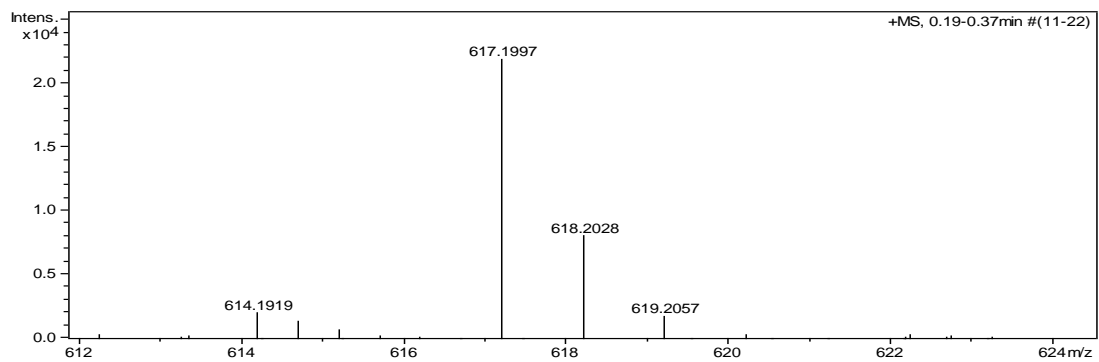

## Ethyl

### *rel*-(1*R*,2*S*,4*S*)-1',3'-dimethyl-2-(4-nitrophenyl)-2',4',6'-trioxo-4-(*p*-tolyl)-1,1',2,3',4,4',6',9-octahydro-2'*H*-spiro[carbazole-3,5'-pyrimidine]-1-carboxylate (1b<sup>7</sup>):

yellow solid, 7%, m.p. 216-218 °C; <sup>1</sup>H NMR (400 MHz, CDCl<sub>3</sub>) δ: 8.58 (s, 1H, NH), 8.11 (d, *J* = 8.8 Hz, 2H, ArH), 7.48 (d, *J* = 8.8 Hz, 2H, ArH), 7.35 (d, *J* = 8.0 Hz, 2H, ArH), 7.11 (d, *J* = 7.6 Hz, 2H, ArH), 7.04 (d, *J* = 8.0 Hz, 1H, ArH), 6.98 (d, *J* = 8.0 Hz, 1H, ArH), 6.81 (t, *J* = 7.6 Hz, 1H, ArH), 6.75 (d, *J* = 8.0 Hz, 1H, ArH), 6.38 (d, *J* = 8.0 Hz, 1H, ArH), 5.19 (d, *J* = 7.6 Hz, 1H, CH), 5.13 (s, 1H, CH), 4.15 (d, *J* = 7.6 Hz, 1H, CH), 4.13 (q, *J* = 7.2 Hz, 2H, CH<sub>2</sub>), 2.99 (s, 3H, CH<sub>3</sub>), 2.82 (s, 3H, CH<sub>3</sub>), 2.32 (s, 3H, CH<sub>3</sub>), 1.17 (t, *J* = 7.2 Hz, 3H, CH<sub>3</sub>); <sup>13</sup>C NMR (400 MHz, CDCl<sub>3</sub>) δ: 170.2, 168.9, 166.8, 150.2, 147.8, 147.4, 145.7, 145.4, 136.4, 131.8, 129.9, 129.8, 125.6, 123.8, 123.5, 123.0, 120.3, 117.8, 111.3, 62.3, 61.1, 45.8, 42.1, 29.6, 29.2, 29.2, 28.9, 14.2; IR(KBr) ν: 3372, 3260, 3182, 3042, 2976, 2832, 2806, 1844, 1672, 1643, 1521, 1416, 1373, 1268, 1172, 1132, 978, 924, 856, 742 cm<sup>-1</sup>; MS (*m/z*): HRMS (ESI) Calcd. for C<sub>33</sub>H<sub>30</sub>N<sub>4</sub>O<sub>7</sub>[M+Na]<sup>+</sup>: 617.2007, found: 617.1998.

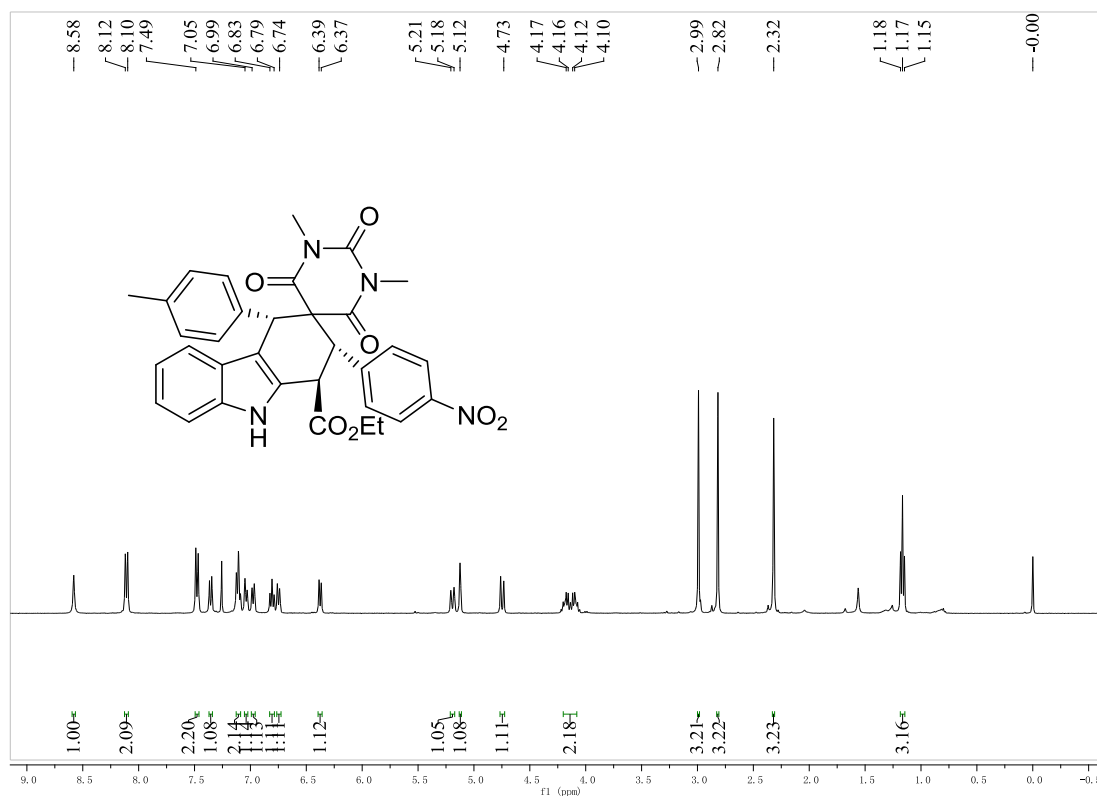

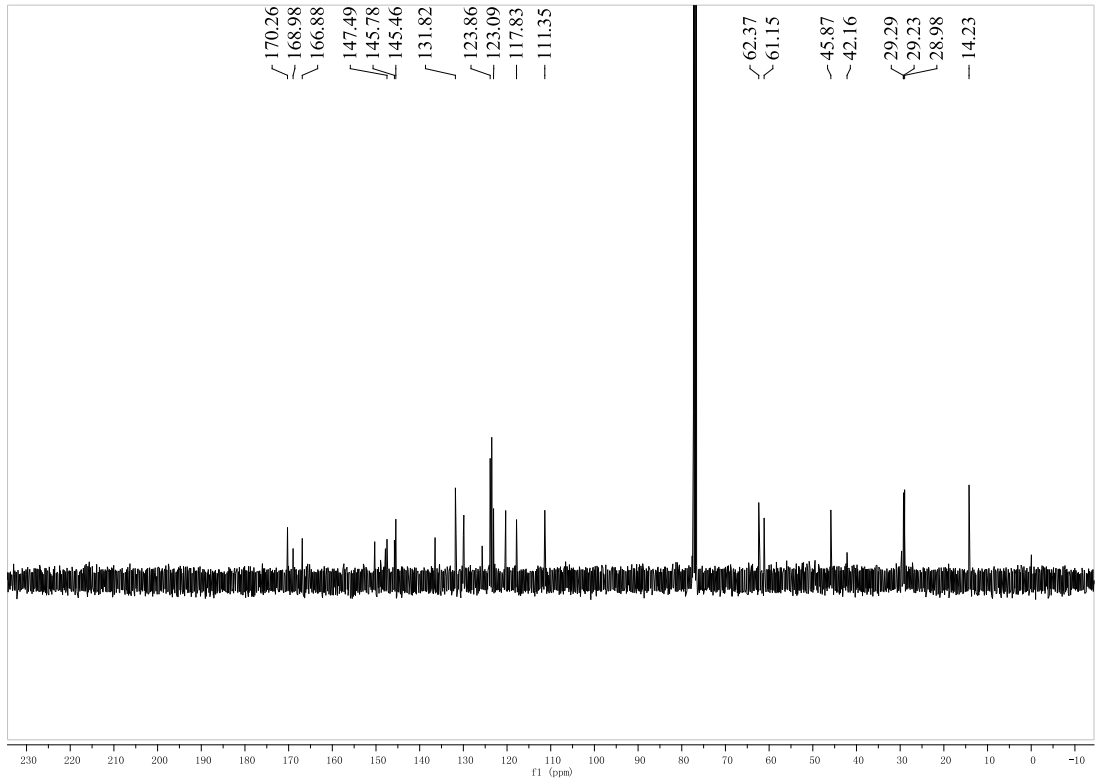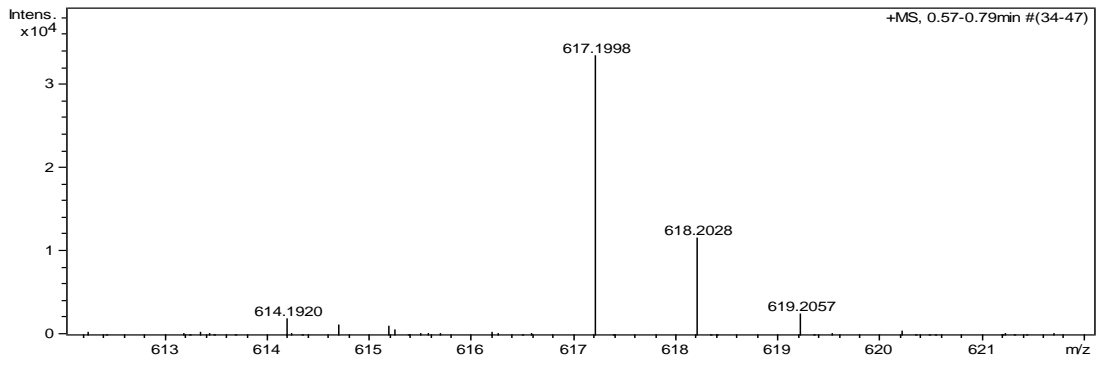

## Ethyl

### ***rel*-(1*R*,2*S*,4*R*)-2-(4-methoxyphenyl)-1',3'-dimethyl-2',4',6'-trioxo-4-(*o*-tolyl)-1,1',2,3',4,4',6',9-octahydro-2'*H*-spiro[carbazole-3,5'-pyrimidine]-1-carboxylate (1c):**

yellow solid, 61%, m.p. 200-203 °C; <sup>1</sup>H NMR (400 MHz, CDCl<sub>3</sub>) δ: 8.49 (s, 1H, NH), 7.31-7.29 (m, 1H, ArH), 7.21-7.19 (m, 3H, ArH), 7.16-7.13 (m, 1H, ArH), 7.05 (t, *J* = 7.2 Hz, 1H, ArH), 6.95 (t, *J* = 7.2 Hz, 1H, ArH), 6.84-6.82 (m, 1H, ArH), 6.76-6.71 (m, 3H, ArH), 6.11-6.09 (m, 1H, ArH), 5.50 (s, 1H, CH), 5.15 (d, *J* = 11.2 Hz, 1H, CH), 4.62 (d, *J* = 11.2 Hz, 1H, CH), 4.09 (q, *J* = 7.2 Hz, 2H, CH<sub>2</sub>), 3.75 (s, 3H, OCH<sub>3</sub>), 2.97 (s, 3H, CH<sub>3</sub>), 2.91 (s, 3H, CH<sub>3</sub>), 2.38 (s, 3H, CH<sub>3</sub>), 1.16 (t, *J* = 7.2 Hz, 3H, CH<sub>3</sub>); <sup>13</sup>C NMR (400 MHz, CDCl<sub>3</sub>) δ: 171.0, 168.7, 159.0, 149.9, 136.4, 136.0, 134.8, 130.7, 130.6, 130.5, 129.7, 129.4, 128.0, 126.2, 125.5, 121.6, 119.5, 119.2, 113.8, 110.8, 108.9, 62.1, 61.6, 55.0, 47.7, 46.8, 45.7, 28.5, 27.9, 19.4, 14.0; IR(KBr) ν: 3335, 3272, 3196, 3056, 2942, 2871, 2821, 2066, 1831, 1655, 1621, 1547, 1435, 1321, 1249, 1112, 1107, 932, 956, 843, 762 cm<sup>-1</sup>; MS (*m/z*): HRMS (ESI) Calcd. for C<sub>34</sub>H<sub>33</sub>N<sub>3</sub>O<sub>6</sub>([M+Na]<sup>+</sup>): 602.2262, found: 602.2250.

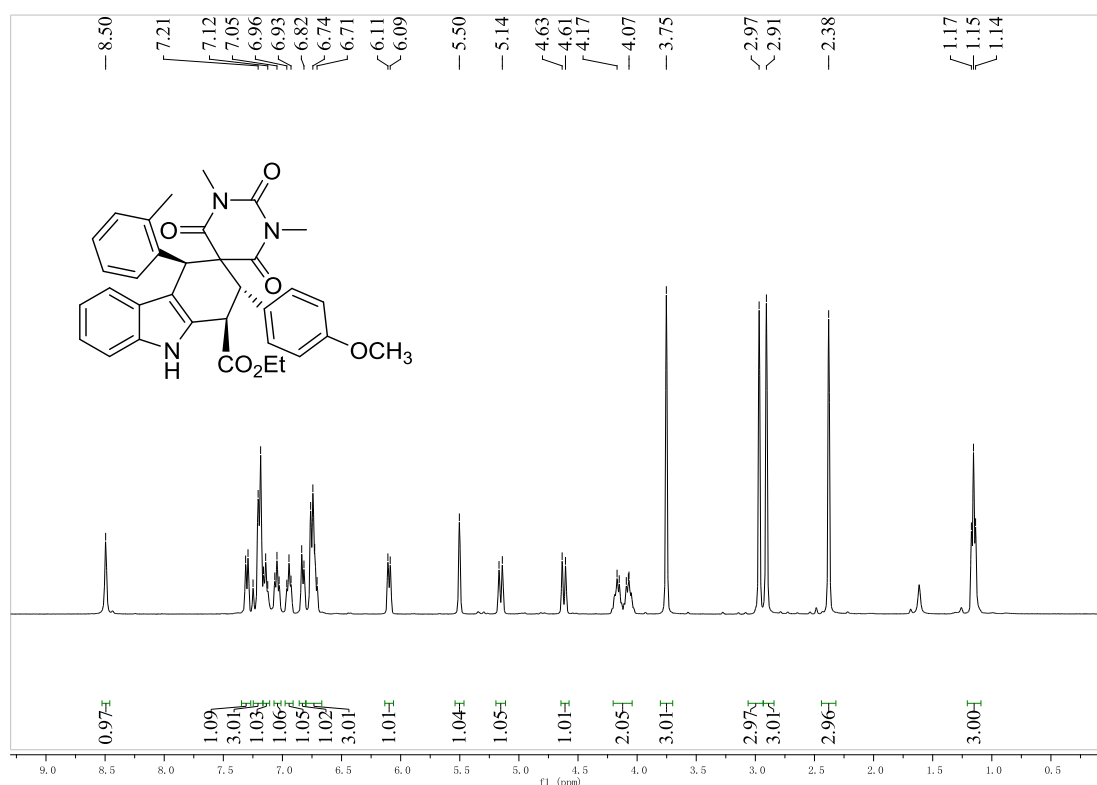

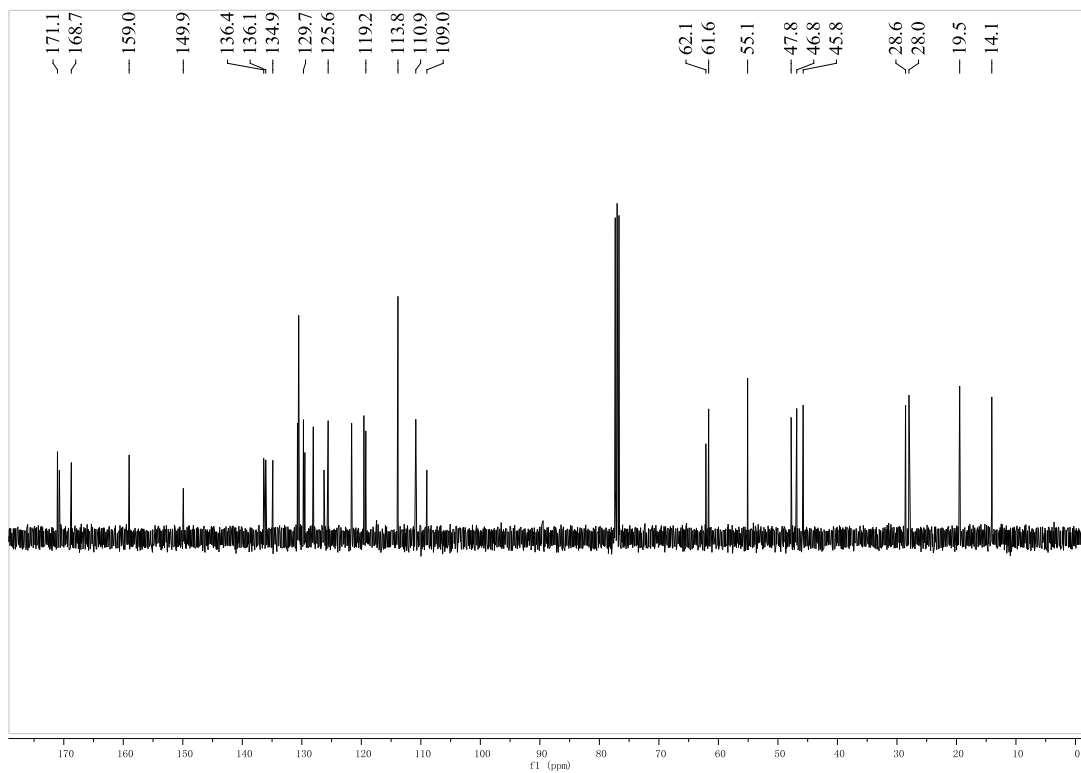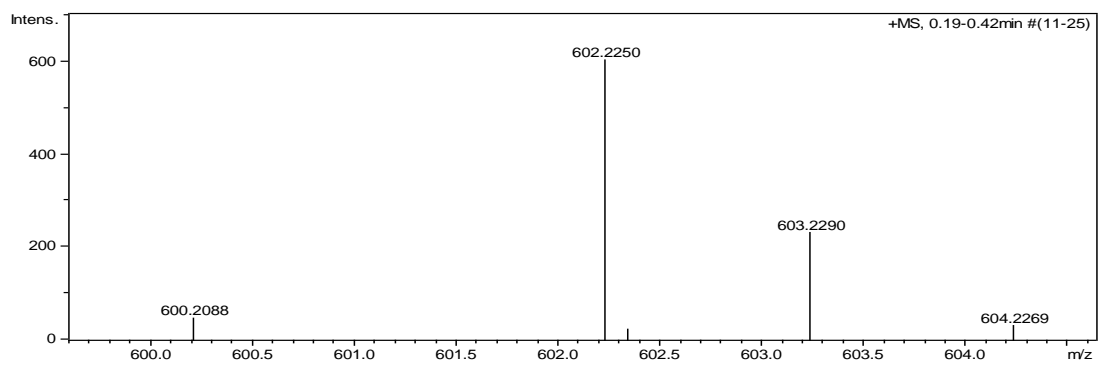

## Ethyl

### *re*-(1*R*,2*S*,4*S*)-2-(4-methoxyphenyl)-1',3'-dimethyl-2',4',6'-trioxo-4-(*o*-tolyl)-1,1',2,3',4,4',6',9-octahydro-2'*H*-spiro[carbazole-3,5'-pyrimidine]-1-carboxylate (1c')

yellow solid, 12.1%, m.p. 216-218 °C; <sup>1</sup>H NMR (400 MHz, CDCl<sub>3</sub>) δ: 8.35 (s, 1H, NH), 7.30 (t, *J* = 8.8 Hz, 3H, ArH), 7.11 (d, *J* = 6.8 Hz, 1H, ArH), 7.07 (d, *J* = 8.8 Hz, 2H, ArH), 6.96-6.89 (m, 2H, ArH), 6.80 (d, *J* = 8.4 Hz, 2H, ArH), 6.72 (d, *J* = 8.8 Hz, 2H, ArH), 5.06 (d, *J* = 10.8 Hz, 1H, CH), 4.60 (d, *J* = 10.8 Hz, 1H, CH), 4.55 (s, 1H, CH), 4.18 (q, *J* = 7.2 Hz, 2H, CH<sub>2</sub>), 3.76 (s, 3H, OCH<sub>3</sub>), 3.74 (s, 3H, CH<sub>3</sub>), 3.25 (s, 3H, CH<sub>3</sub>), 2.98 (s, 3H, CH<sub>3</sub>), 1.23 (t, *J* = 7.2 Hz, 3H, CH<sub>3</sub>); <sup>13</sup>C NMR (400 MHz, CDCl<sub>3</sub>) δ: 171.0, 168.7, 159.0, 149.9, 136.4, 136.0, 134.8, 130.7, 130.6, 130.5, 129.7, 129.4, 128.0, 126.2, 125.5, 121.6, 119.5, 119.2, 113.8, 110.8, 108.9, 62.1, 61.6, 55.0, 47.7, 46.8, 45.7, 28.5, 27.9, 19.4, 14.0; IR(KBr) ν: 3362, 3306, 3184, 3042, 2913, 2855, 2809, 2100, 1845, 1642, 1603, 1547, 1442, 1376, 1251, 1134, 1157, 972, 962, 832, 759 cm<sup>-1</sup>; MS (*m/z*): HRMS (ESI) Calcd. for C<sub>34</sub>H<sub>33</sub>N<sub>3</sub>O<sub>6</sub>[M+Na]<sup>+</sup>: 602.2262, found: 602.2260.

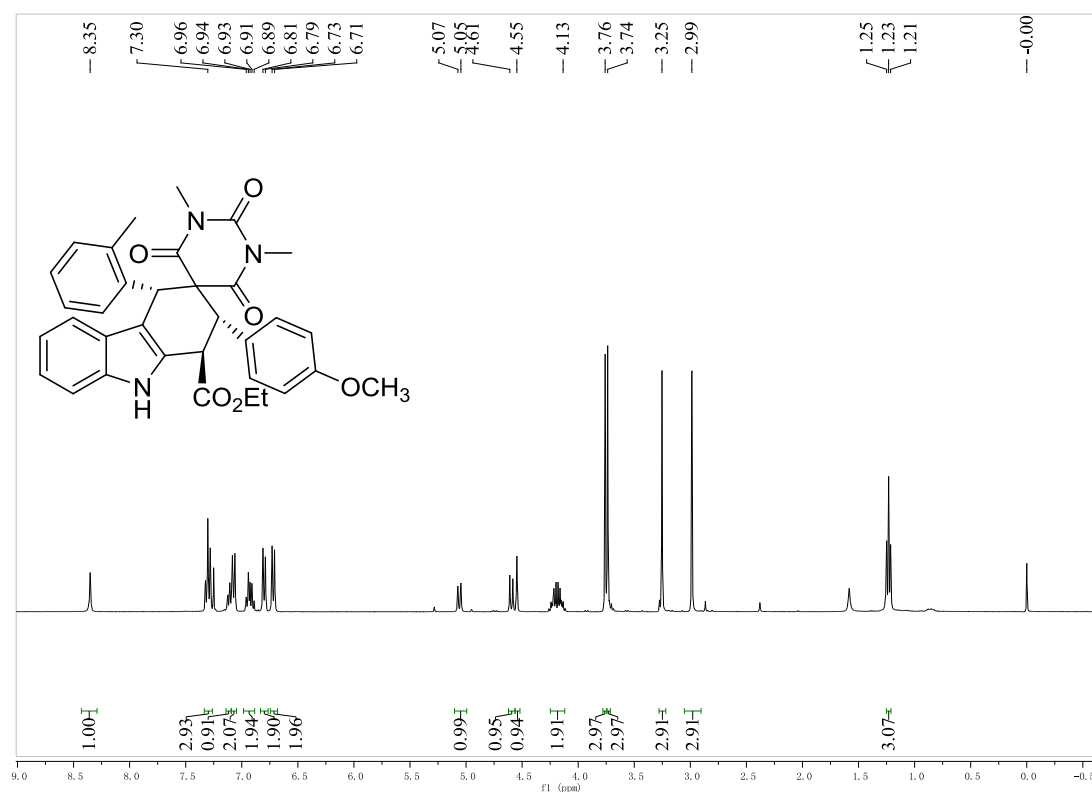



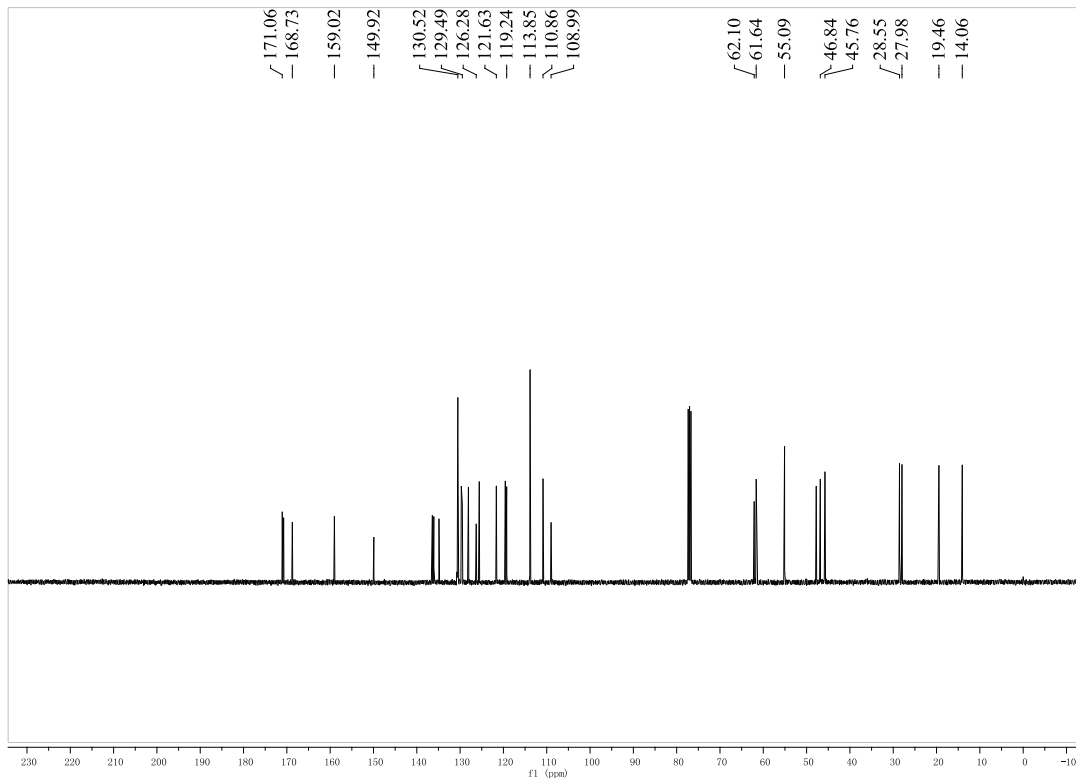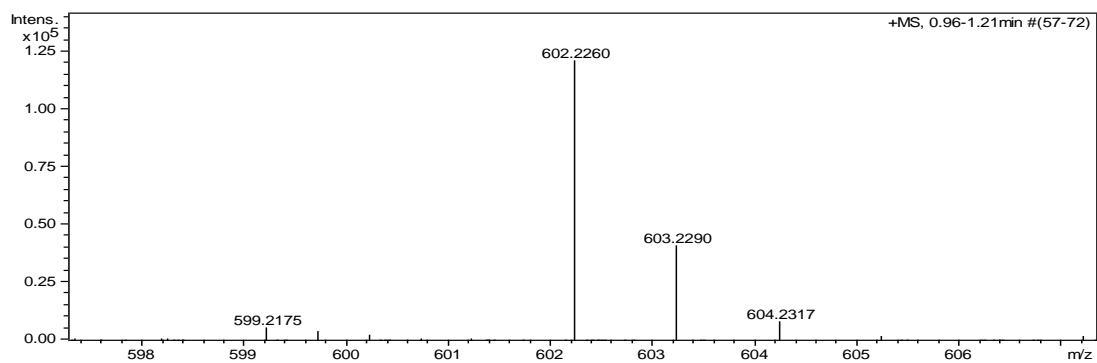

## Ethyl

### *rel*-(1*R*,2*S*,4*R*)-2-(4-methoxyphenyl)-1',3'-dimethyl-2',4',6'-trioxo-4-(*m*-tolyl)-1,1',2,3',4,4',6',9-octahydro-2'*H*-spiro[carbazole-3,5'-pyrimidine]-1-carboxylate (**1d**):

yellow solid, 70%, m.p. 205-209 °C; <sup>1</sup>H NMR (400 MHz, CDCl<sub>3</sub>) δ: 8.46 (s, 1H, NH), 7.31 (d, *J* = 8.4 Hz, 1H, ArH), 7.26-7.25 (m, 1H, ArH), 7.19 (d, *J* = 8.4 Hz, 3H, ArH), 7.15 (t, *J* = 7.6 Hz, 1H, ArH), 7.05 (t, *J* = 7.6 Hz, 1H, ArH), 6.95 (t, *J* = 7.6 Hz, 1H, ArH), 6.82 (d, *J* = 8.4 Hz, 1H, ArH), 6.76-6.71 (m, 3H, ArH), 6.09 (d, *J* = 8.4 Hz, 1H, ArH), 5.51 (s, 1H, CH), 5.15 (d, *J* = 11.2 Hz, 1H, CH), 4.62 (d, *J* = 11.2 Hz, 1H, CH), 4.12 (q, *J* = 6.8 Hz, 2H, CH<sub>2</sub>), 3.76 (s, 3H, OCH<sub>3</sub>), 2.97 (s, 3H, CH<sub>3</sub>), 2.91 (s, 3H, CH<sub>3</sub>), 2.38 (s, 3H, CH<sub>3</sub>), 1.16 (t, *J* = 6.8 Hz, 3H, CH<sub>3</sub>); <sup>13</sup>C NMR (400 MHz, CDCl<sub>3</sub>) δ: 171.0, 168.7, 159.0, 149.9, 136.3, 136.0, 134.8, 130.7, 130.5, 130.5, 129.7, 129.4, 128.0, 126.2, 125.5, 121.6, 119.5, 119.2, 113.8, 110.8, 109.9, 108.9, 62.0, 61.6, 55.0, 47.7, 46.8, 45.7, 28.5, 27.9, 19.4, 14.0; IR(KBr) ν: 3348, 3321, 3207, 3176, 3055, 2972, 2846, 2813, 2102, 1855, 1638, 1621, 1536, 1476, 1332, 1278, 1164, 1143, 946, 911, 854, 763 cm<sup>-1</sup>; MS (*m/z*): HRMS (ESI) Calcd. for C<sub>34</sub>H<sub>33</sub>N<sub>3</sub>O<sub>6</sub>([M+Na]<sup>+</sup>): 602.2262, found: 602.2241.

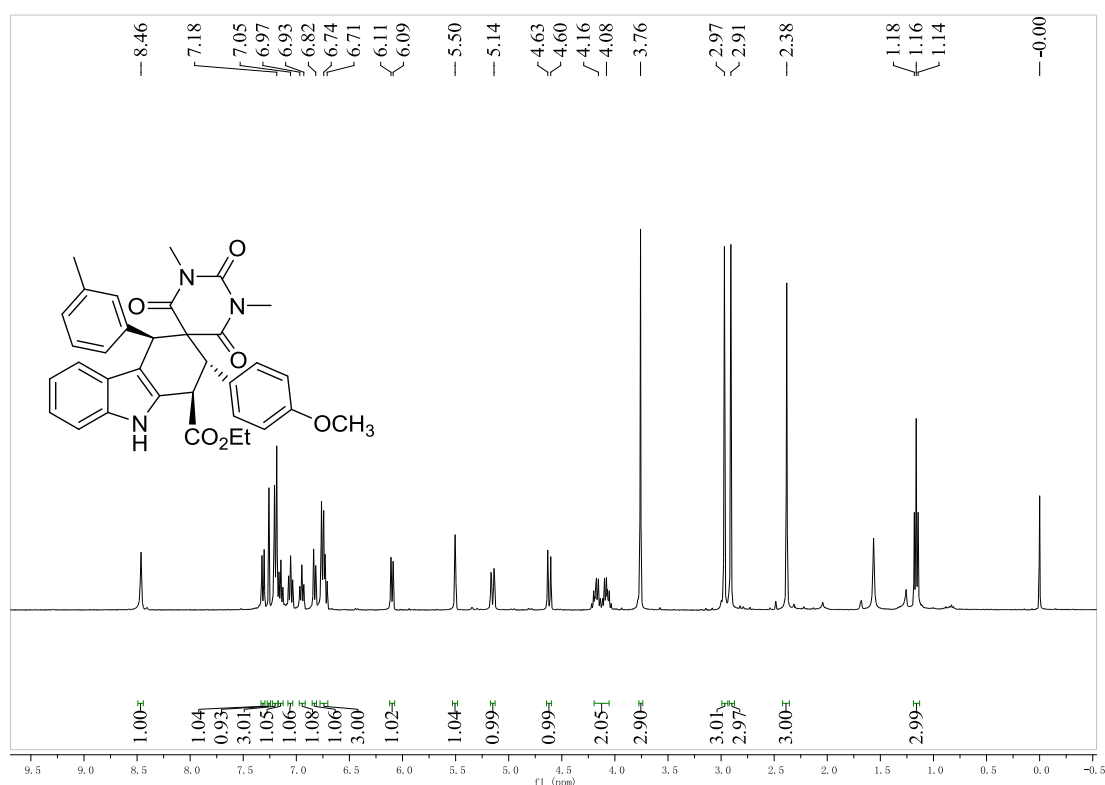

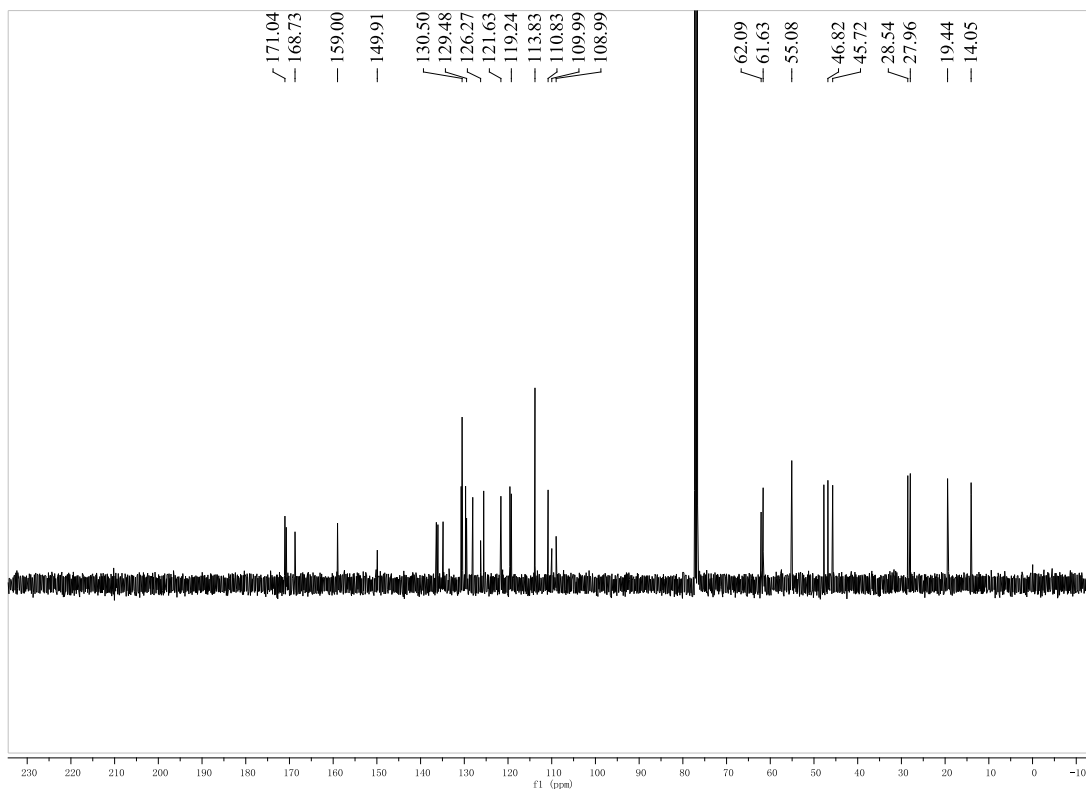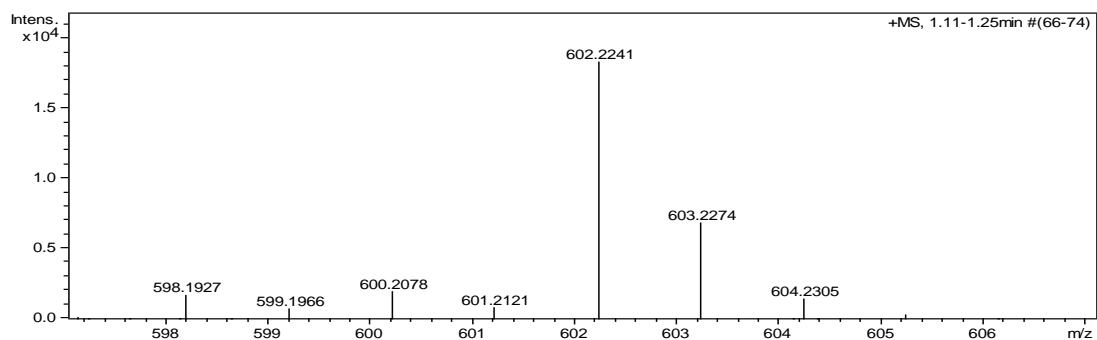

## Ethyl

### *rel*-(1*R*,2*S*,4*R*)-2-(4-chlorophenyl)-1',3'-dimethyl-2',4',6'-trioxo-4-(*m*-tolyl)-1,1',2,3',4,4',6',9-*o*ctahydro-2'*H*-spiro[carbazole-3,5'-pyrimidine]-1-carboxylate (**1e**):

yellow solid, 60%, m.p. 211-213 °C; <sup>1</sup>H NMR (400 MHz, CDCl<sub>3</sub>) δ: 8.39 (s, 1H, NH), 7.36-7.32 (m, 3H, ArH), 7.18-7.15 (m, 3H, ArH), 7.13-7.08 (m, 2H, ArH), 7.01-6.99 (m, 1H, ArH), 6.94-6.91 (m, 3H, ArH), 5.09 (d, *J* = 10.8 Hz, 1H, CH), 4.65 (d, *J* = 10.8 Hz, 1H, CH), 4.55 (s, 1H, CH), 4.21 (q, *J* = 6.8 Hz, 2H, CH<sub>2</sub>), 3.26 (s, 3H, CH<sub>3</sub>), 2.99 (s, 3H, CH<sub>3</sub>), 2.31 (s, 3H, CH<sub>3</sub>), 1.25 (t, *J* = 6.8 Hz, 3H, CH<sub>3</sub>); <sup>13</sup>C NMR (400 MHz, CDCl<sub>3</sub>) δ: 170.9, 169.8, 167.2, 150.8, 138.4, 137.2, 136.4, 133.4, 132.3, 130.2, 129.5, 129.1, 128.3, 126.3, 122.4, 119.7, 118.2, 111.0, 107.6, 61.8, 61.7, 50.7, 46.3, 41.1, 28.9, 28.7, 21.4, 14.1; IR(KBr) ν: 3327, 3306, 3267, 3152, 3072, 2989, 2832, 2813, 2145, 1802, 1645, 1621, 1578, 1445, 1324, 1245, 1147, 1129, 952, 933, 862, 792 cm<sup>-1</sup>; MS (*m/z*): HRMS (ESI) Calcd. for C<sub>33</sub>H<sub>30</sub>ClN<sub>3</sub>O<sub>5</sub>([M+Na]<sup>+</sup>): 606.1766, found: 606.1761.

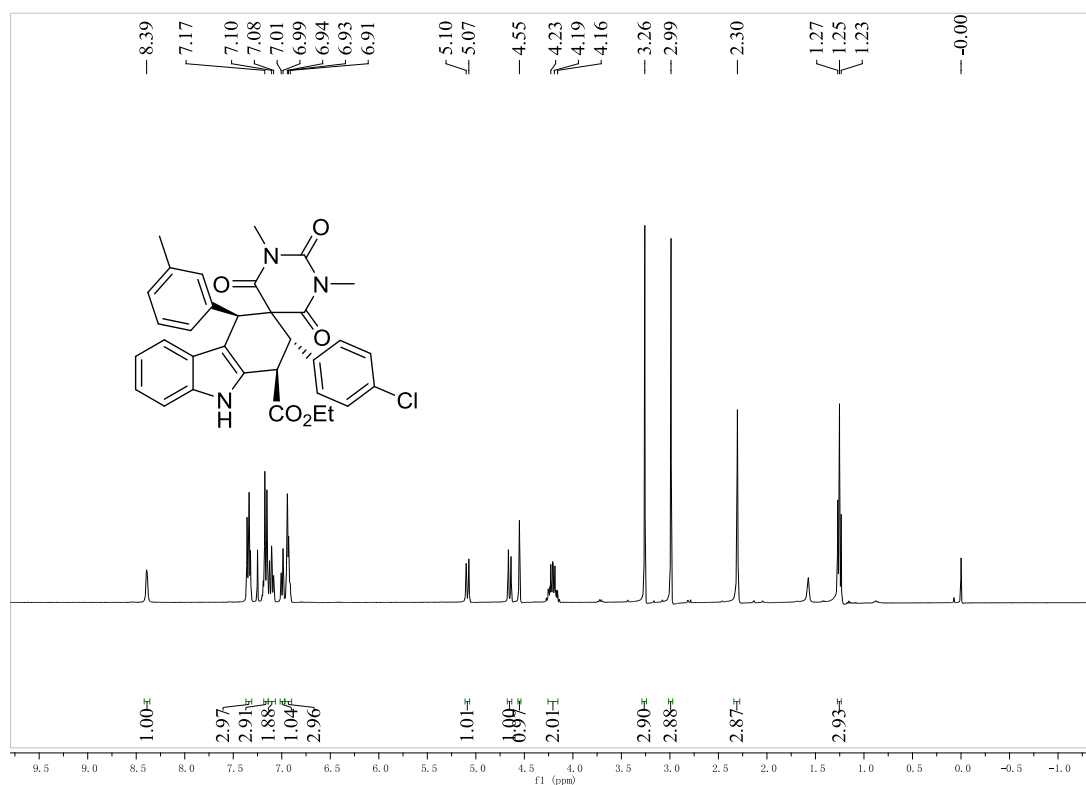

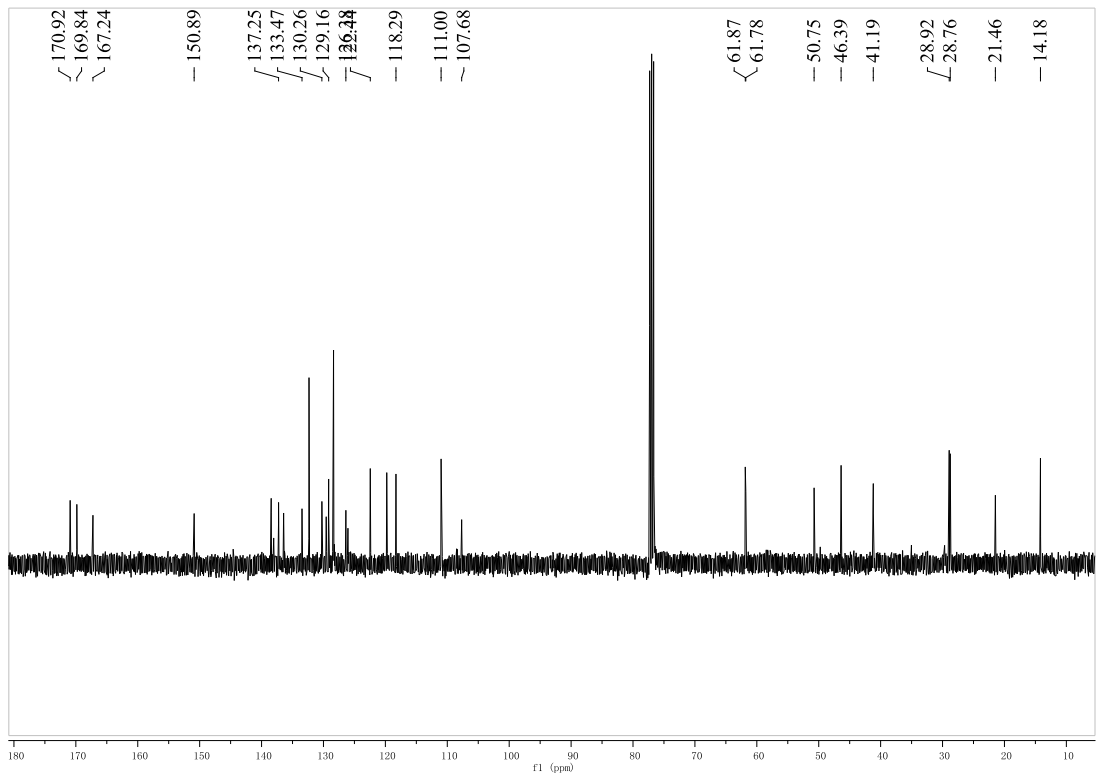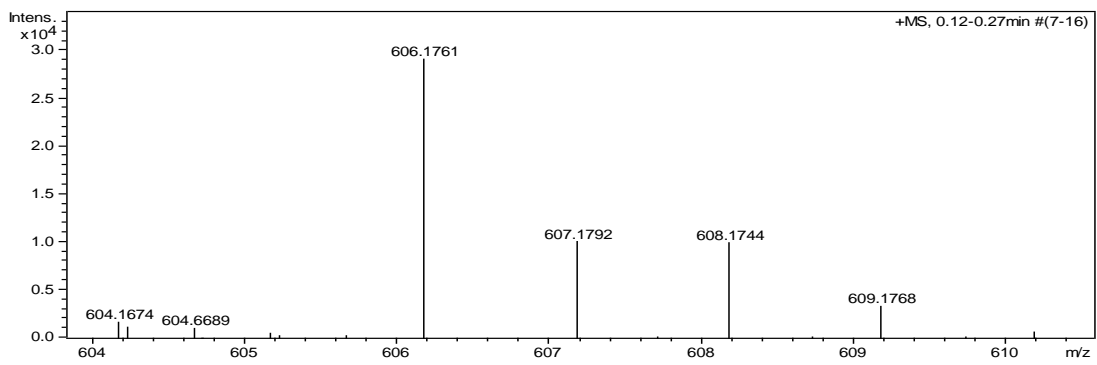

## Ethyl

### *rel*-(1*R*,2*S*,4*R*)-4-(4-methoxyphenyl)-1',3'-dimethyl-2',4',6'-trioxo-2-phenyl-1,1',2,3',4,4',6',9-octahydro-2'*H*-spiro[carbazole-3,5'-pyrimidine]-1-carboxylate (**1f**):

yellow solid, 70%, m.p. 204-206 °C; <sup>1</sup>H NMR (400 MHz, CDCl<sub>3</sub>) δ: 8.40 (s, 1H, NH), 7.39-7.37 (m, 2H, ArH), 7.31 (d, *J* = 8.0 Hz, 1H, ArH), 7.21-7.18 (m, 3H, ArH), 7.13-7.07 (m, 3H, ArH), 6.97-6.89 (m, 2H, ArH), 6.80 (d, *J* = 8.0 Hz, 2H, ArH), 5.09 (d, *J* = 10.8 Hz, 1H, CH), 4.63 (d, *J* = 10.8 Hz, 1H, CH), 4.57 (s, 1H, CH), 4.17 (q, *J* = 7.2 Hz, 2H, CH<sub>2</sub>), 3.76 (s, 3H, OCH<sub>3</sub>), 3.26 (s, 3H, CH<sub>3</sub>), 2.98 (s, 3H, CH<sub>3</sub>), 1.21 (t, *J* = 7.2 Hz, 3H, CH<sub>3</sub>); <sup>13</sup>C NMR (400 MHz, CDCl<sub>3</sub>) δ: 171.2, 169.9, 167.3, 159.3, 151.0, 138.7, 136.4, 130.7, 130.7, 130.4, 130.0, 128.2, 127.5, 126.4, 122.3, 119.6, 118.3, 113.8, 110.9, 108.1, 61.8, 61.7, 55.0, 49.8, 46.4, 42.2, 28.8, 28.7, 14.1; IR(KBr) ν: 3362, 3348, 3213, 3162, 3078, 2963, 2832, 2814, 2162, 1873, 1642, 1613, 1566, 1481, 1365, 1262, 1178, 1137, 952, 921, 862, 782 cm<sup>-1</sup>; MS (*m/z*): HRMS (ESI) Calcd. for C<sub>33</sub>H<sub>31</sub>N<sub>3</sub>O<sub>6</sub>[M+Na]<sup>+</sup>: 588.2105, found: 588.2101.

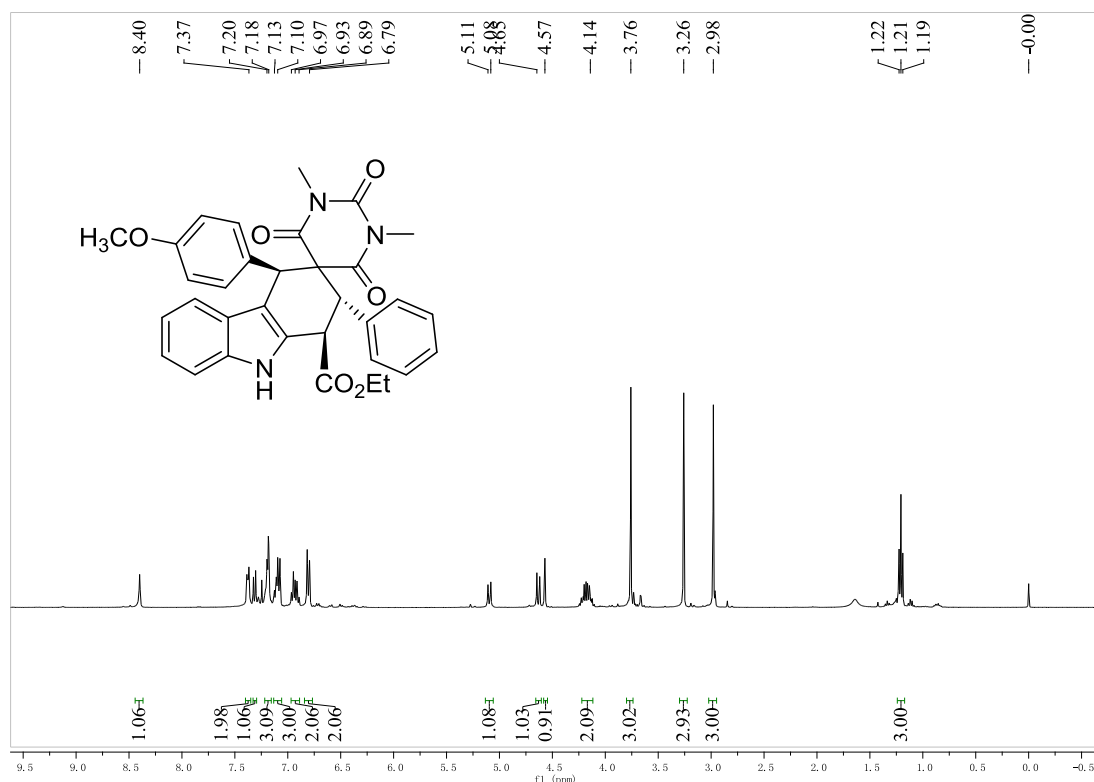

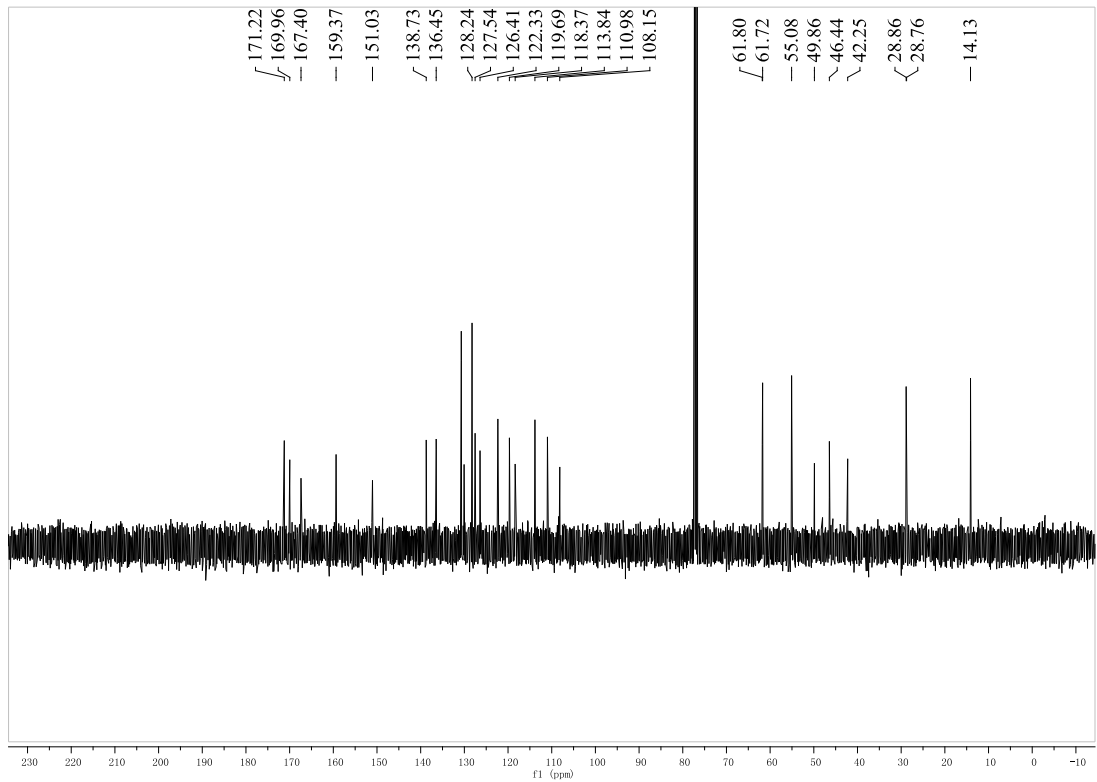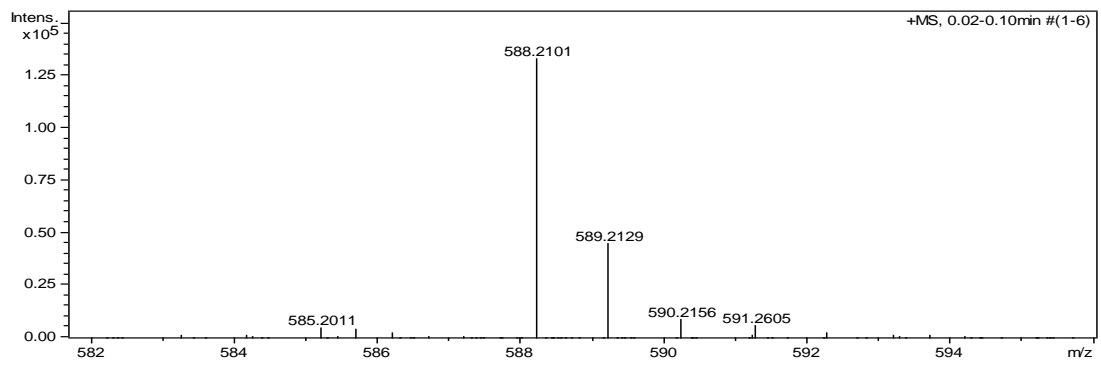

## Ethyl

### *rel*-(1*R*,2*S*,4*R*)-4-(4-chlorophenyl)-1',3'-dimethyl-2',4',6'-trioxo-2-(*p*-tolyl)-1,1',2,3',4,4',6',9-*o*-ctahydro-2'*H*-spiro[carbazole-3,5'-pyrimidine]-1-carboxylate (**1g**):

yellow solid, 75%, m.p. 206-210 °C; <sup>1</sup>H NMR (400 MHz, CDCl<sub>3</sub>) δ: 8.42 (s, 1H, NH), 7.32 (d, *J* = 8.0 Hz, 1H, ArH), 7.24 (d, *J* = 8.0 Hz, 2H, ArH), 7.20 (d, *J* = 8.0 Hz, 1H, ArH), 7.12-7.10 (m, 3H, ArH), 7.01-6.99 (m, 2H, ArH), 6.92-6.91 (m, 2H, ArH), 5.07-5.02 (m, 1H, CH), 4.64-4.58 (m, 1H, CH), 4.57-4.56 (m, 1H, CH), 4.17 (q, *J* = 7.2 Hz, 2H, CH<sub>2</sub>), 3.25 (s, 3H, CH<sub>3</sub>), 2.98 (s, 3H, CH<sub>3</sub>), 2.26 (s, 3H, CH<sub>3</sub>), 1.23 (t, *J* = 7.2 Hz, 3H, CH<sub>3</sub>); <sup>13</sup>C NMR (400 MHz, CDCl<sub>3</sub>) δ: 171.1, 169.6, 167.3, 150.8, 137.6, 137.3, 136.4, 135.1, 134.0, 130.7, 130.5, 130.3, 130.3, 129.0, 128.7, 126.1, 122.4, 119.8, 118.2, 111.0, 107.5, 61.8, 61.4, 49.1, 46.3, 42.2, 28.9, 28.7, 21.0, 14.1; IR(KBr) ν: 3323, 3307, 3264, 3153, 3042, 2982, 2832, 2855, 2172, 1842, 1673, 1643, 1521, 1455, 1367, 1272, 1183, 1142, 952, 963, 872, 746 cm<sup>-1</sup>; MS (*m/z*): HRMS (ESI) Calcd. for C<sub>33</sub>H<sub>30</sub>ClN<sub>3</sub>O<sub>5</sub> ([M+Na]<sup>+</sup>): 606.1766, found: 606.1762.

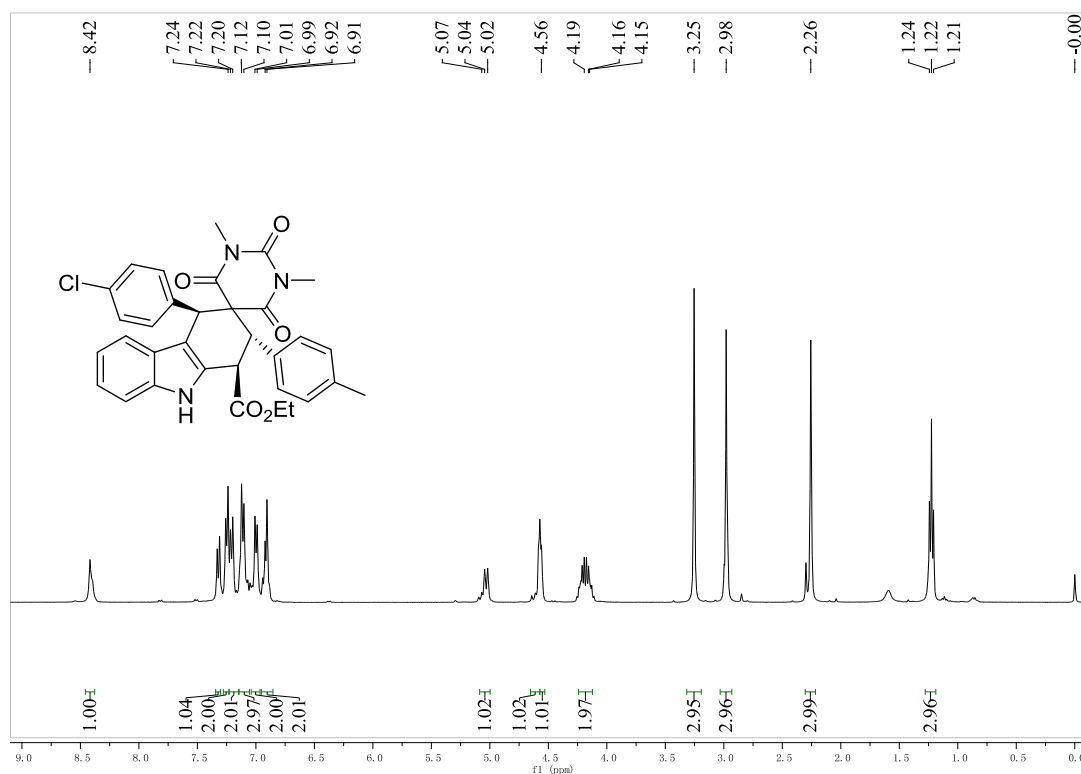



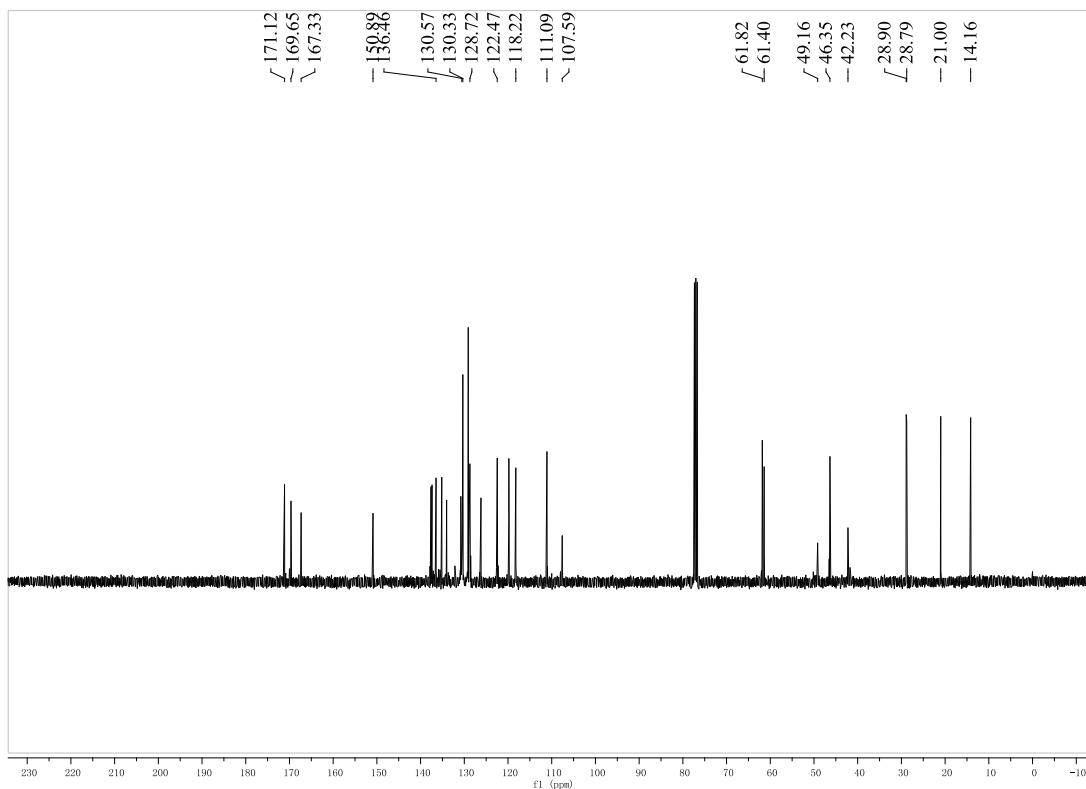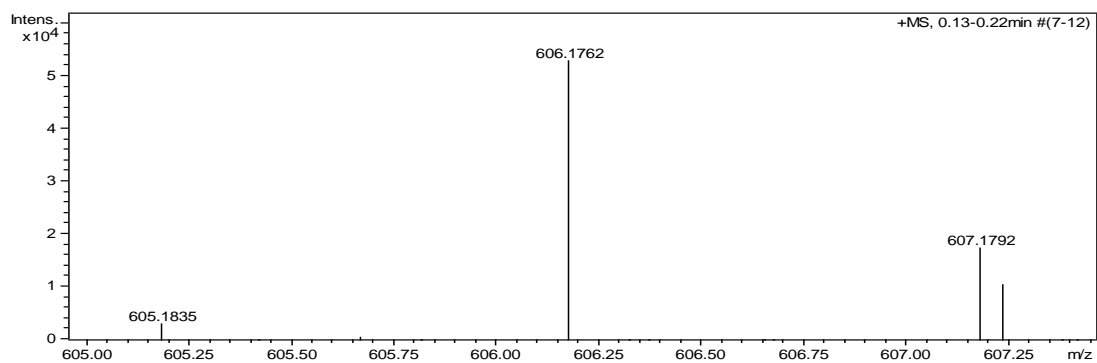

## Ethyl

### *rel*-(1*R*,2*S*,4*R*)-2,4-bis(4-chlorophenyl)-1',3'-dimethyl-2',4',6'-trioxo-1,1',2,3',4,4',6',9-octahydro-2'*H*-spiro[carbazole-3,5'-pyrimidine]-1-carboxylate (1h):

yellow solid, 68%, m.p. 212-214 °C; <sup>1</sup>H NMR (400 MHz, CDCl<sub>3</sub>) δ: 8.43 (s, 1H, NH), 7.31 (d, *J* = 8.4 Hz, 3H, ArH), 7.25 (d, *J* = 8.4 Hz, 2H, ArH), 7.17 (d, *J* = 8.0 Hz, 2H, ArH), 7.15-7.13 (m, 1H, ArH), 7.09 (d, *J* = 8.0 Hz, 2H, ArH), 6.95-6.92 (m, 2H, ArH), 5.06 (d, *J* = 10.4 Hz, 1H, CH), 4.59 (d, *J* = 10.4 Hz, 1H, CH), 4.57 (s, 1H, CH), 4.20 (q, *J* = 7.2 Hz, 2H, CH<sub>2</sub>), 3.26 (s, 3H, CH<sub>3</sub>), 3.00 (s, 3H, CH<sub>3</sub>), 1.24 (t, *J* = 7.2 Hz, 3H, CH<sub>3</sub>); <sup>13</sup>C NMR (400 MHz, CDCl<sub>3</sub>) δ: 170.8, 169.5, 167.1, 150.7, 137.3, 136.8, 136.4, 134.2, 133.6, 132.1, 130.3, 130.2, 128.8, 128.5, 126.0, 122.6, 119.9, 118.1, 111.1, 107.3, 61.9, 61.4, 49.6, 46.2, 41.6, 29.0, 28.8, 14.1; IR(KBr) ν: 3379, 3321, 3265, 3178, 3045, 2978, 2864, 2832, 2187, 1839, 1655, 1632, 1576, 1462, 1348, 1267, 1178, 1132, 976, 948, 862, 755 cm<sup>-1</sup>; MS (*m/z*): HRMS (ESI) Calcd. for C<sub>32</sub>H<sub>27</sub>Cl<sub>2</sub>N<sub>3</sub>O<sub>5</sub> ([M+Na]<sup>+</sup>): 626.1220, found: 606.1200.

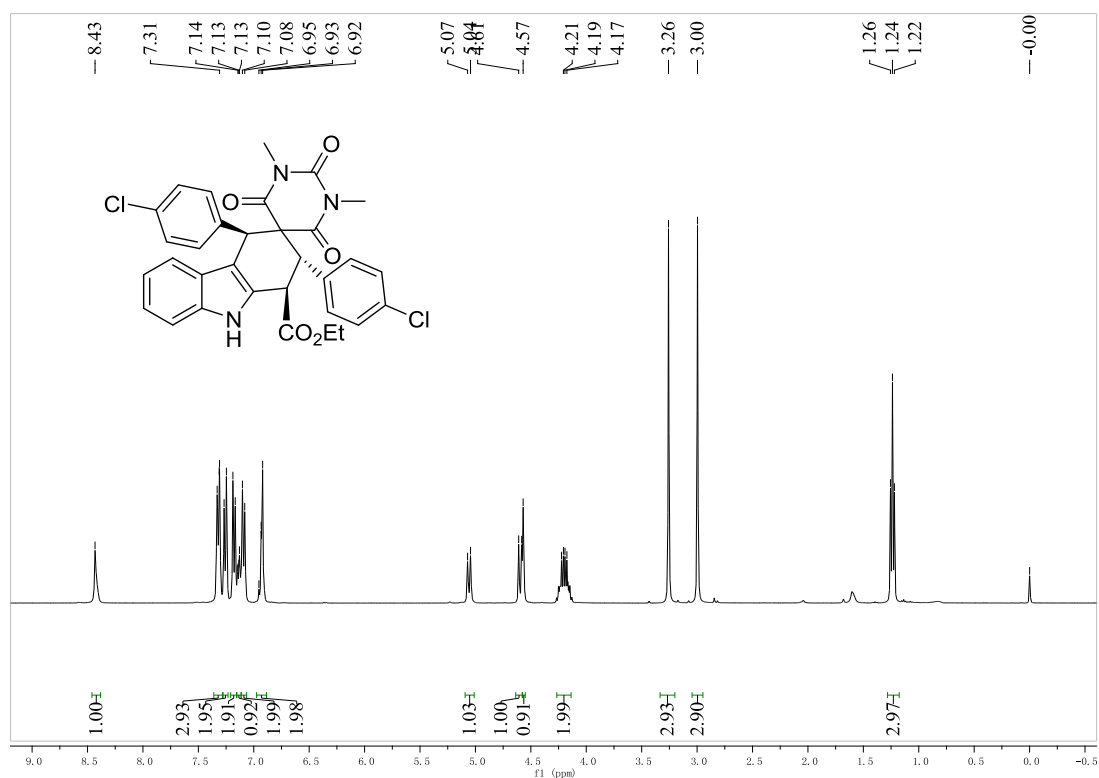

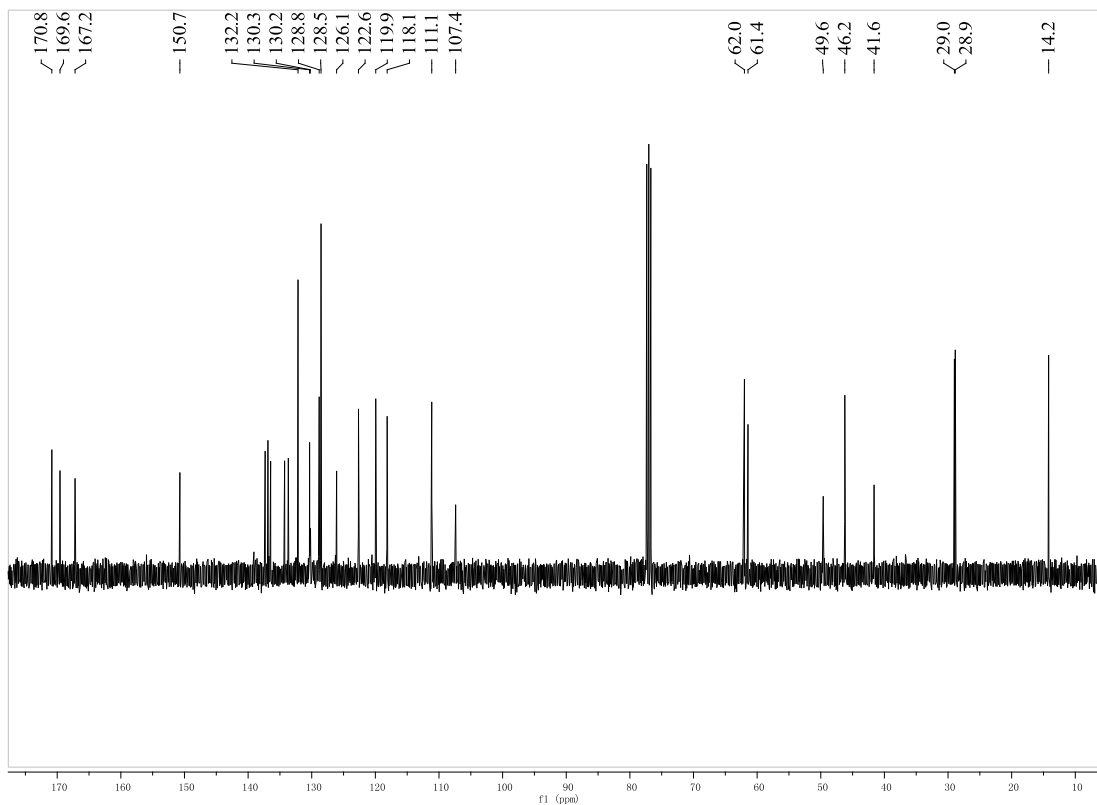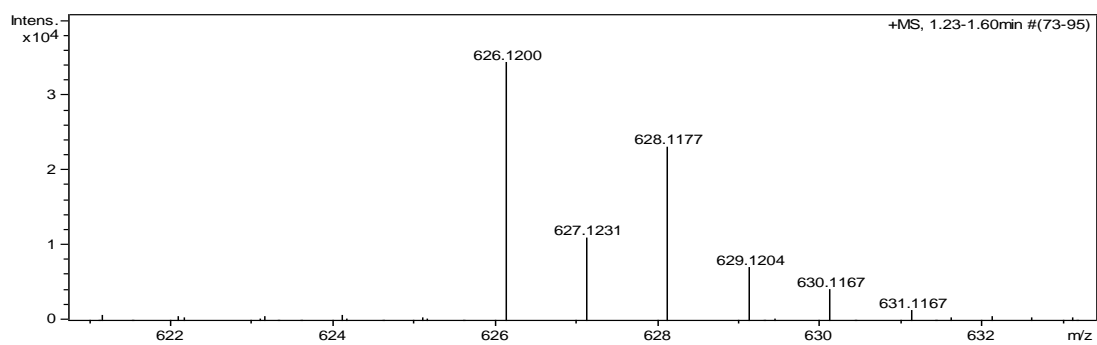

## Ethyl

### *rel*-(1R,2S,4R)-4-(3-chlorophenyl)-1',3'-dimethyl-2',4',6'-trioxo-2-phenyl-1,1',2,3',4,4',6',9-octahydro-2'H-spiro[carbazole-3,5'-pyrimidine]-1-carboxylate (**1i**):

yellow solid, 76%, m.p. 216-219 °C; <sup>1</sup>H NMR (400 MHz, CDCl<sub>3</sub>) δ: 8.48 (s, 1H, NH), 7.38-7.30 (m, 3H, ArH), 7.29-7.28 (m, 1H, ArH), 7.25-7.23 (m, 1H, ArH), 7.22-7.19 (m, 5H, ArH), 7.15-7.11 (m, 1H, ArH), 7.08-7.06 (m, 1H, ArH), 6.96-6.91 (m, 2H, ArH), 5.08 (d, *J* = 10.8 Hz, 1H, CH), 4.61 (d, *J* = 10.8 Hz, 1H, CH), 4.57 (s, 1H, CH), 4.18 (q, *J* = 7.2 Hz, 2H, CH<sub>2</sub>), 3.26 (s, 3H, CH<sub>3</sub>), 3.01 (s, 3H, CH<sub>3</sub>), 1.22 (t, *J* = 7.2 Hz, 3H, CH<sub>3</sub>); <sup>13</sup>C NMR (400 MHz, CDCl<sub>3</sub>) δ: 171.0, 169.5, 167.2, 150.8, 141.0, 138.2, 136.4, 130.9, 130.7, 130.5, 128.4, 128.3, 128.2, 127.7, 126.1, 122.5, 119.8, 118.1, 111.1, 107.1, 61.9, 61.3, 49.6, 46.5, 42.3, 28.9, 28.7, 14.1; IR(KBr) ν: 3362, 3308, 3242, 3163, 3055, 2932, 2845, 2816, 2134, 1832, 1643, 1617, 1532, 1473, 1365, 1248, 1162, 1146, 982, 948, 872, 780 cm<sup>-1</sup>; MS (*m/z*): HRMS (ESI) Calcd. for C<sub>32</sub>H<sub>28</sub>ClN<sub>3</sub>O<sub>5</sub>[M+Na]<sup>+</sup>: 592.1610, found: 592.1591.

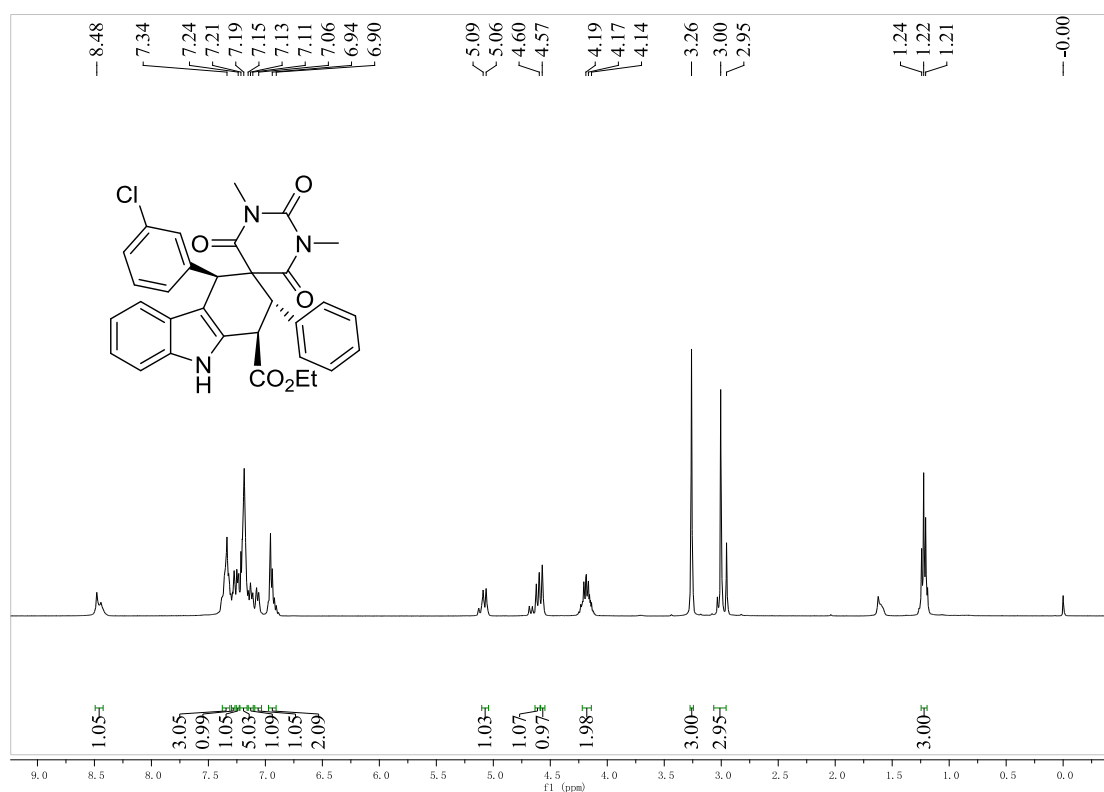

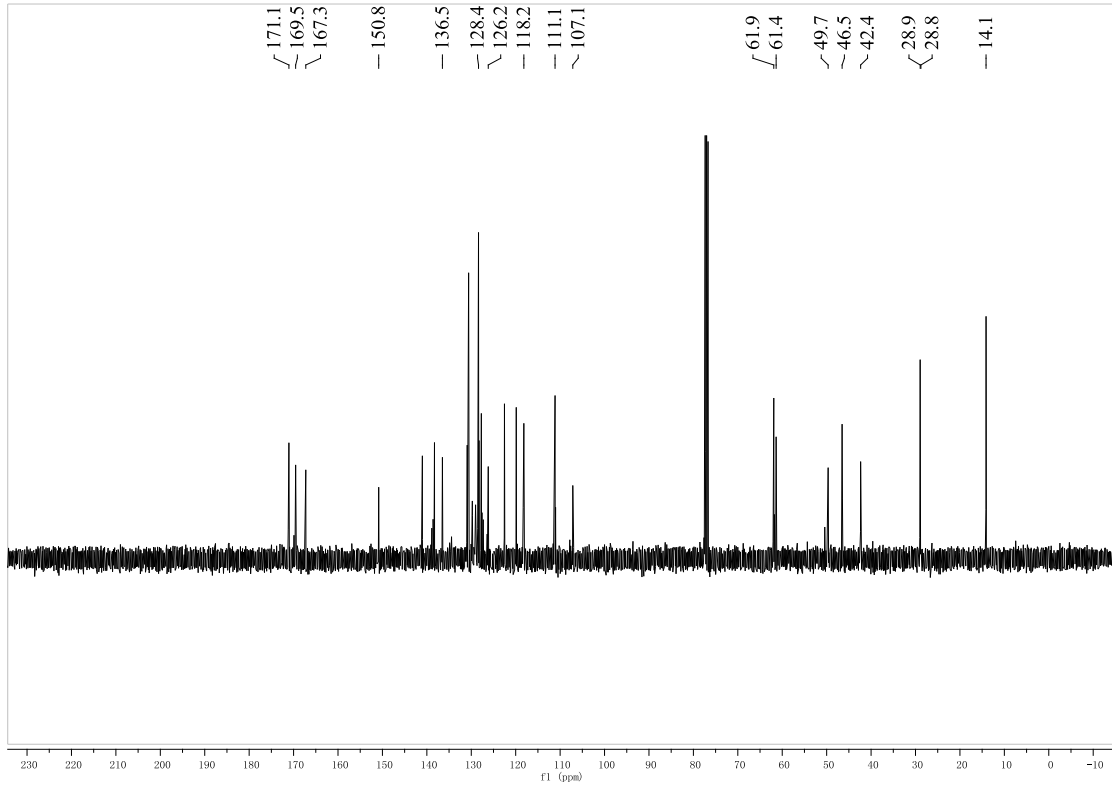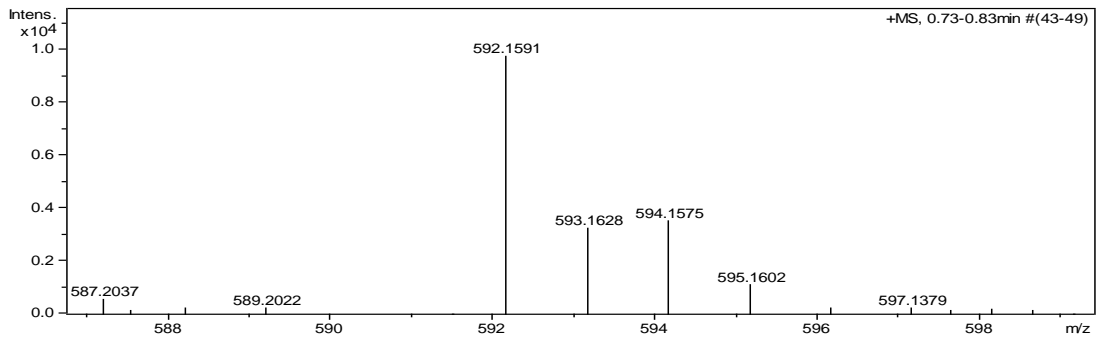

## Ethyl

### *rel*-(1*R*,2*S*,4*S*)-1',3'-dimethyl-4-(3-nitrophenyl)-2',4',6'-trioxo-2-(*p*-tolyl)-1,1',2,3',4,4',6',9-octahydro-2'*H*-spiro[carbazole-3,5'-pyrimidine]-1-carboxylate (**1j**):

yellow solid, 73%, m.p. 211-213 °C; <sup>1</sup>H NMR (400 MHz, CDCl<sub>3</sub>) δ: 8.43 (s, 1H, NH), 8.05 (d, *J* = 8.8 Hz, 2H, ArH), 7.64 (d, *J* = 8.8 Hz, 2H, ArH), 7.34 (d, *J* = 8.8 Hz, 1H, ArH), 7.16-7.09 (m, 3H, ArH), 7.02 (d, *J* = 7.2 Hz, 2H, ArH), 6.98 (d, *J* = 7.2 Hz, 1H, ArH), 6.95-6.92 (m, 1H, ArH), 5.16 (d, *J* = 10.8 Hz, 1H, CH), 4.78 (d, *J* = 10.8 Hz, 1H, CH), 4.60 (s, 1H, CH), 4.21 (d, *J* = 7.2 Hz, 2H, CH<sub>2</sub>), 3.28 (s, 3H, CH<sub>3</sub>), 2.99 (s, 3H, CH<sub>3</sub>), 2.32 (s, 3H, CH<sub>3</sub>), 1.26 (t, *J* = 7.2 Hz, 3H, CH<sub>3</sub>); <sup>13</sup>C NMR (400 MHz, CDCl<sub>3</sub>) δ: 170.5, 169.7, 167.2, 150.7, 147.2, 146.5, 138.3, 136.4, 135.1, 132.1, 129.5, 129.4, 128.6, 126.2, 123.2, 122.6, 119.9, 118.2, 111.0, 107.7, 62.0, 61.9, 50.7, 46.1, 41.6, 29.0, 28.9, 21.1, 14.1; IR(KBr) ν: 3364, 3321, 3278, 3168, 3055, 2962, 2872, 2844, 2132, 1847, 1617, 1601, 1532, 1431, 1333, 1241, 1162, 1142, 972, 931, 872, 782 cm<sup>-1</sup>; MS (*m/z*): HRMS (ESI) Calcd. for C<sub>33</sub>H<sub>30</sub>N<sub>4</sub>O<sub>7</sub>([M+Na]<sup>+</sup>): 617.2007, found: 617.2003.

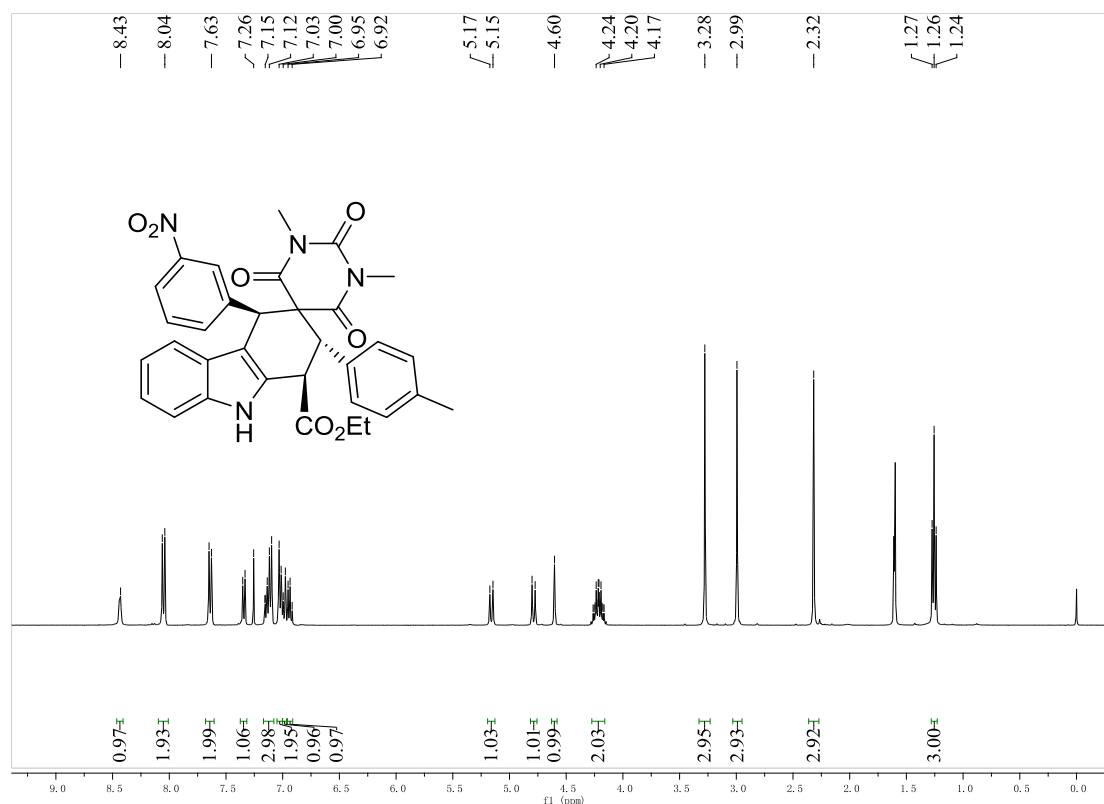

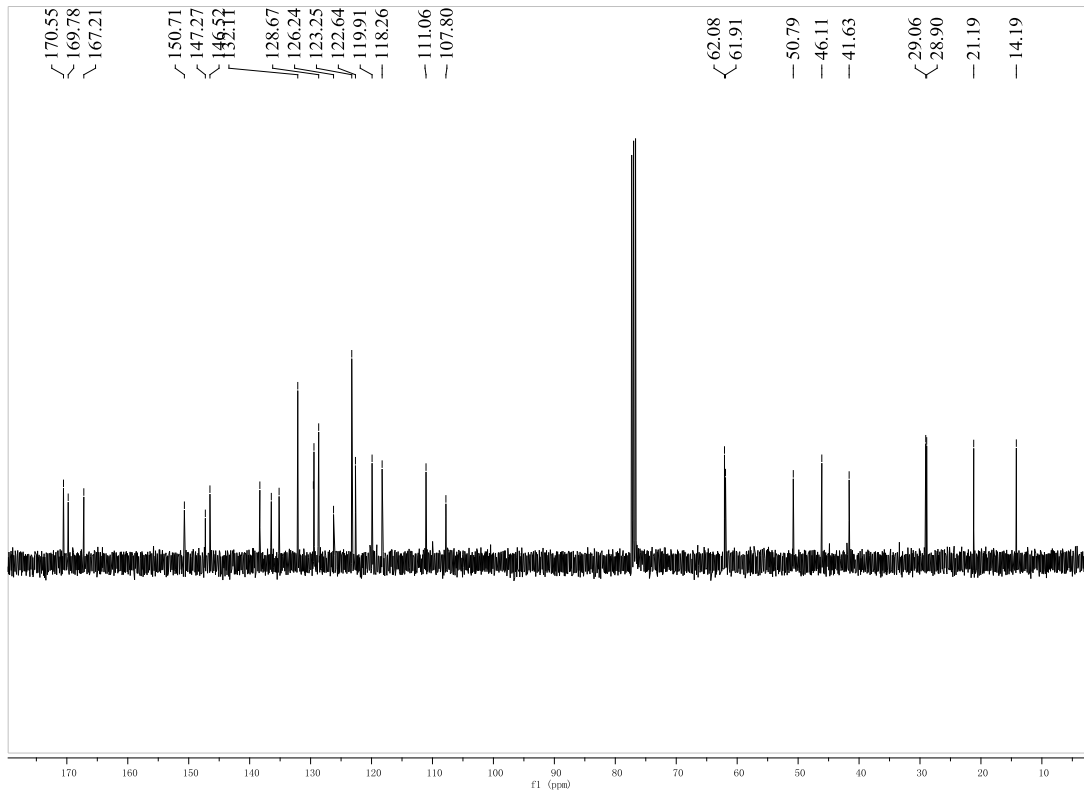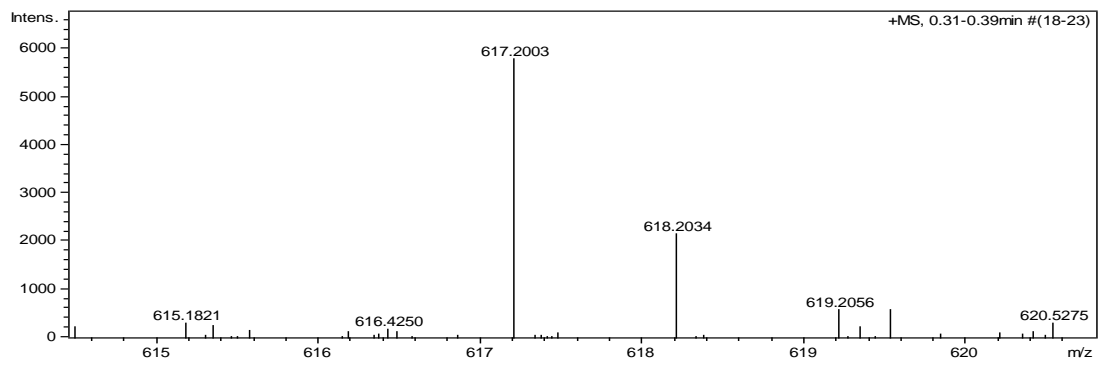

## Ethyl

### *rel*-(1*R*,2*S*,4*R*)-1',3'-dimethyl-4-(3-nitrophenyl)-2',4',6'-trioxo-2-(*p*-tolyl)-1,1',2,3',4,4',6',9-octahydro-2'*H*-spiro[carbazole-3,5'-pyrimidine]-1-carboxylate (1j')

yellow solid, 9%, m.p. 220-222 °C; <sup>1</sup>H NMR (400 MHz, CDCl<sub>3</sub>) δ: 8.52 (s, 1H, NH), 8.14 (d, *J* = 8.0 Hz, 1H, ArH), 8.09 (s, 1H, ArH), 7.54 (d, *J* = 8.0 Hz, 1H, ArH), 7.47-7.44 (m, 1H, ArH), 7.35 (d, *J* = 8.0 Hz, 1H, ArH), 7.18-7.12 (m, 3H, ArH), 7.00 (d, *J* = 8.0 Hz, 2H, ArH), 6.95-6.89 (m, 2H, ArH), 5.03 (d, *J* = 10.4 Hz, 1H, CH), 4.73 (s, 1H, CH), 4.55 (d, *J* = 10.4 Hz, 1H, CH), 4.22 (q, *J* = 7.2 Hz, 2H, CH<sub>2</sub>), 3.27 (s, 3H, CH<sub>3</sub>), 3.00 (s, 3H, CH<sub>3</sub>), 2.26 (s, 3H, CH<sub>3</sub>), 1.25 (t, *J* = 7.2 Hz, 3H, CH<sub>3</sub>); <sup>13</sup>C NMR (400 MHz, CDCl<sub>3</sub>) δ: 170.9, 169.1, 167.4, 150.6, 141.4, 137.6, 136.5, 134.6, 131.2, 130.1, 129.2, 125.8, 123.2, 122.6, 119.9, 117.9, 111.3, 62.0, 61.2, 48.7, 46.5, 42.4, 42.4, 29.0, 28.8, 20.9, 14.1; IR(KBr) ν: 3378, 3314, 3255, 3172, 3046, 2978, 2856, 2832, 2114, 1856, 1632, 1642, 1577, 1438, 1348, 1255, 1179, 1135, 980, 952, 889, 779 cm<sup>-1</sup>; MS (*m/z*): HRMS (ESI) Calcd. for C<sub>33</sub>H<sub>30</sub>N<sub>4</sub>O<sub>7</sub>([M+Na]<sup>+</sup>): 617.2007, found: 617.1998.

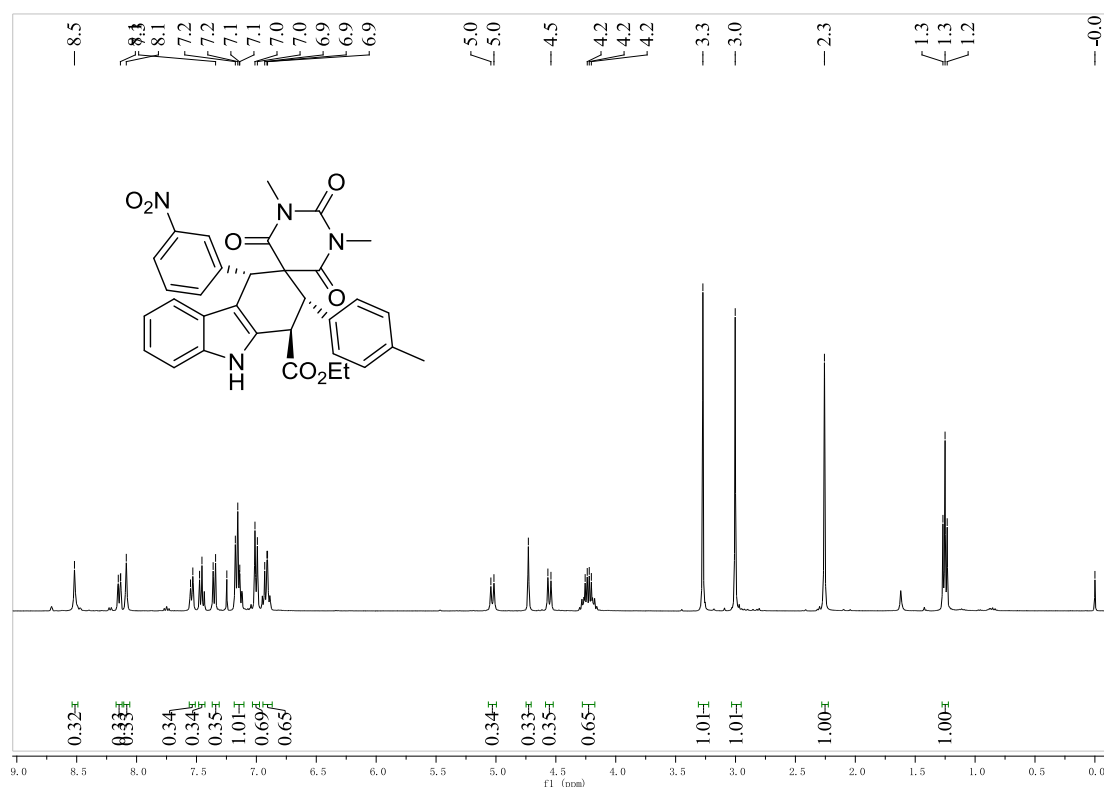



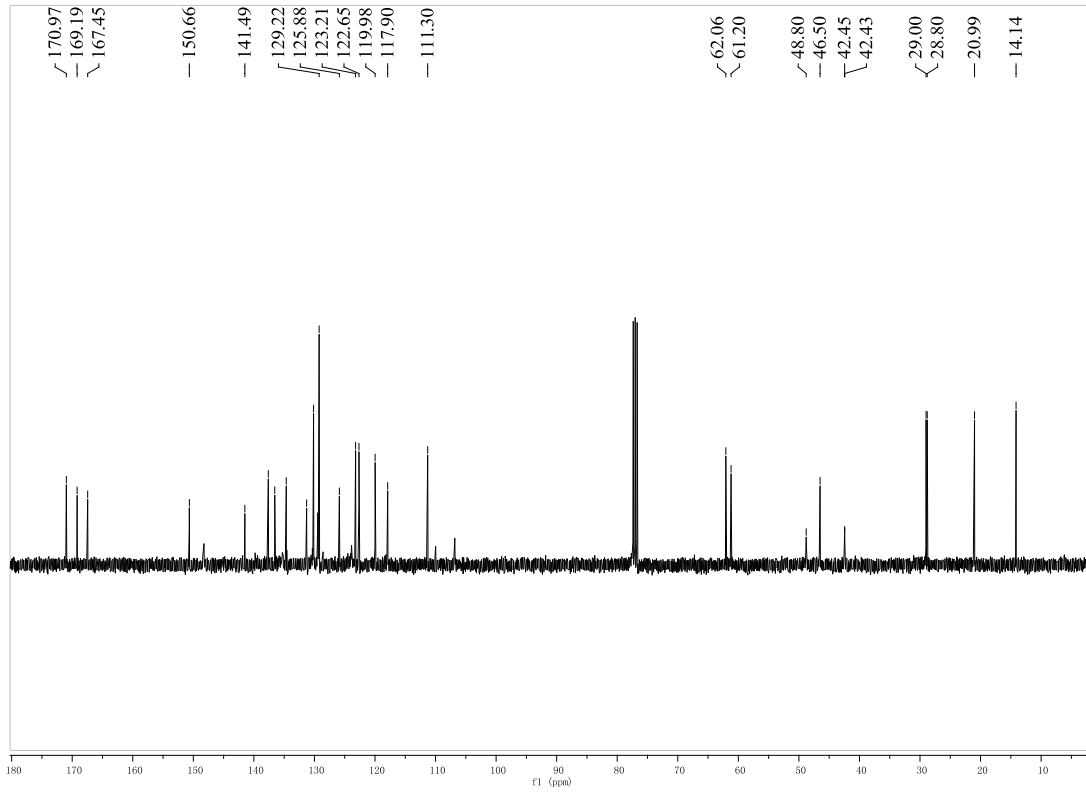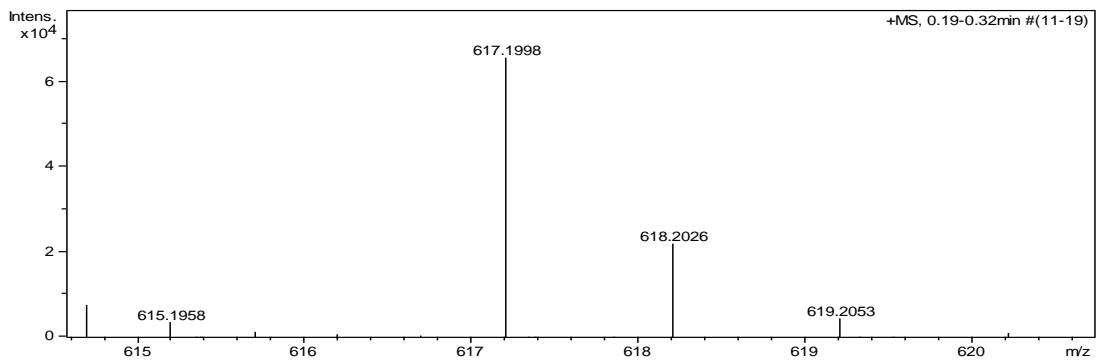

## Ethyl

### *rel*-(1*R*,2*S*,4*R*)-1',3'-dimethyl-2',4',6'-trioxo-2,4-di-*o*-tolyl-1,1',2,3',4,4',6',9-octahydro-2'H-spiro[carbazole-3,5'-pyrimidine]-1-carboxylate (1k')

yellow solid, 71%, m.p. 203-206 °C; <sup>1</sup>H NMR (400 MHz, CDCl<sub>3</sub>) δ: 8.37 (s, 1H, NH), 7.31 (d, *J* = 8.4 Hz, 1H, ArH), 7.18 (t, *J* = 7.2 Hz, 1H, ArH), 7.15 (d, *J* = 7.2 Hz, 1H, ArH), 7.13-7.09 (m, 2H, ArH), 7.07-7.04 (m, 2H, ArH), 6.95 (t, *J* = 7.2 Hz, 1H, ArH), 6.86 (d, *J* = 8.0 Hz, 1H, ArH), 6.73 (t, *J* = 7.2 Hz, 1H, ArH), 6.09 (d, *J* = 8.0 Hz, 1H, ArH), 5.61 (d, *J* = 1.6 Hz, 1H, CH), 5.10 (dd, *J*<sub>1</sub> = 11.2 Hz, *J*<sub>2</sub> = 2.0 Hz, 1H, CH), 4.89 (d, *J* = 11.2 Hz, 1H, CH), 4.11 (q, *J* = 7.2 Hz, 2H, CH<sub>2</sub>), 2.99 (s, 3H, CH<sub>3</sub>), 2.88 (s, 3H, CH<sub>3</sub>), 2.54 (s, 3H, CH<sub>3</sub>), 2.41 (s, 3H, CH<sub>3</sub>), 1.14 (t, *J* = 7.2 Hz, 3H, CH<sub>3</sub>); <sup>13</sup>C NMR (400 MHz, CDCl<sub>3</sub>) δ: 171.2, 170.3, 169.0, 149.9, 138.6, 136.6, 136.3, 136.0, 134.9, 131.3, 130.9, 130.7, 129.9, 128.0, 127.7, 126.3, 126.2, 126.0, 125.6, 121.6, 119.5, 119.2, 110.8, 109.6, 61.6, 61.4, 47.1, 47.0, 44.3, 28.5, 28.1, 19.8, 19.6, 14.0; IR(KBr) ν: 3382, 3245, 3163, 3023, 2918, 2832, 2152, 1873, 1655, 1631, 1542, 1428, 1317, 1295, 1167, 1145, 956, 923, 872, 745 cm<sup>-1</sup>; MS (*m/z*): HRMS (ESI) Calcd. for C<sub>34</sub>H<sub>33</sub>N<sub>3</sub>O<sub>5</sub> ([M+Na]<sup>+</sup>):586.2312, found: 586.2297.

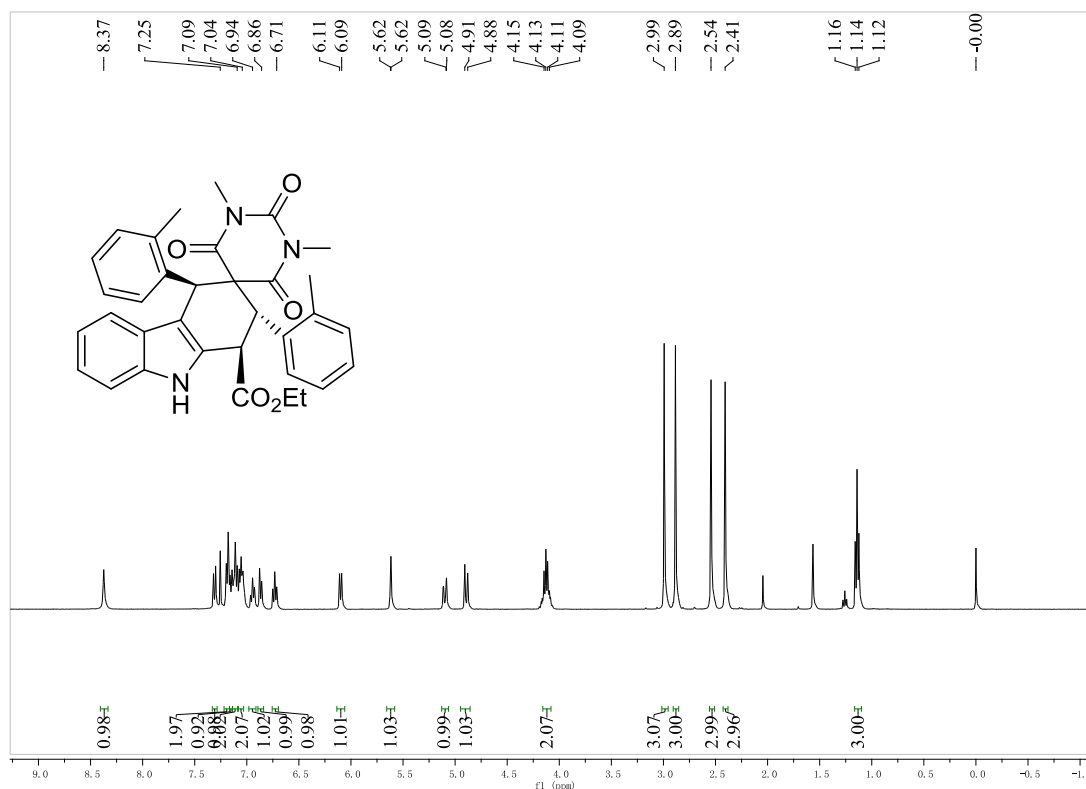

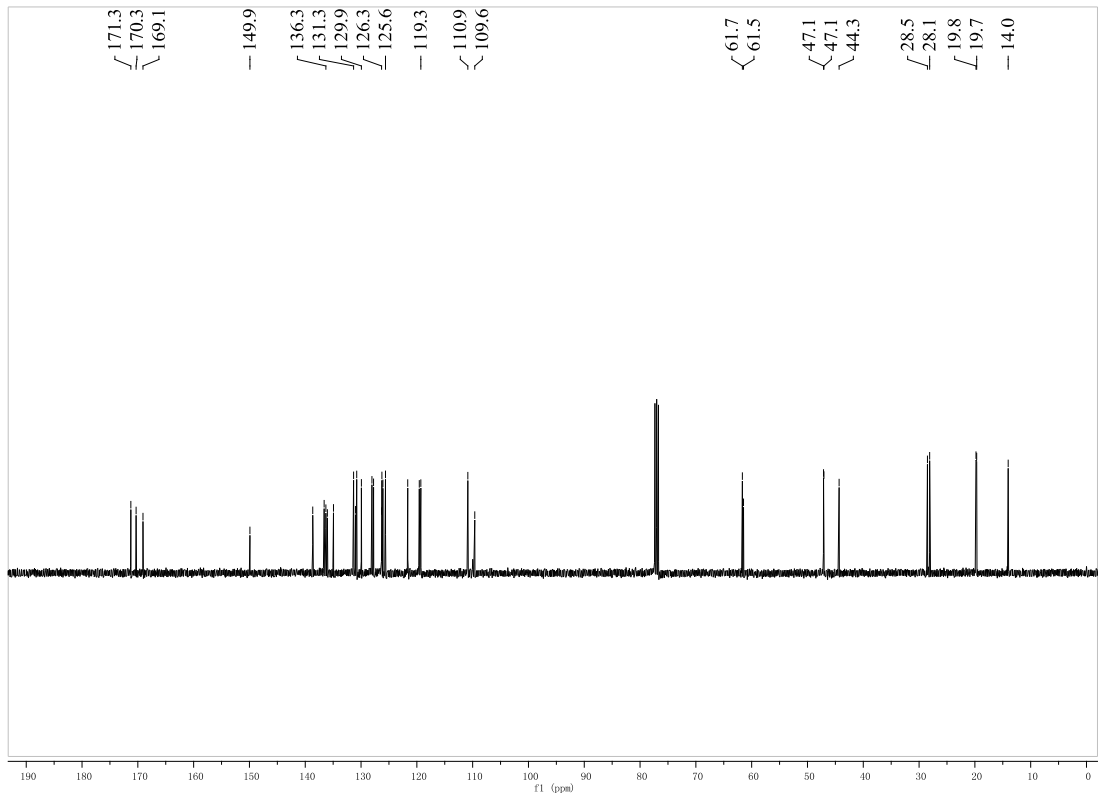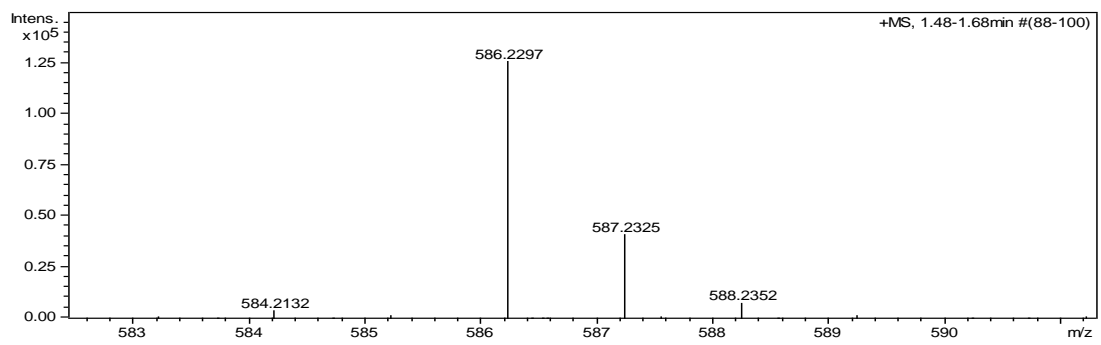

## Ethyl

### *rel*-(1*R*,2*S*,4*S*)-1',3'-dimethyl-2',4',6'-trioxo-2,4-di-*o*-tolyl-1,1',2,3',4,4',6',9-octahydro-2'*H*-spiro[carbazole-3,5'-pyrimidine]-1-carboxylate (1*k*'):

yellow solid, 9%, m.p. 211-214 °C; <sup>1</sup>H NMR (400 MHz, CDCl<sub>3</sub>) δ: 8.22 (s, 1H, NH), 7.37 (d, *J* = 8.4 Hz, 1H, ArH), 7.31 (d, *J* = 8.4 Hz, 1H, ArH), 7.28-7.26 (m, 1H, ArH), 7.17-7.15 (m, 2H, ArH), 7.14-7.10 (m, 2H, ArH), 7.08-7.05 (m, 3H, ArH), 6.91 (t, *J* = 7.6 Hz, 1H, ArH), 6.85 (d, *J* = 7.6 Hz, 1H, ArH), 5.02-4.99 (m, 2H, CH), 4.96 (s, 1H, CH), 4.17 (q, *J* = 7.2 Hz, 2H, CH<sub>2</sub>), 3.32 (s, 3H, CH<sub>3</sub>), 2.85 (s, 3H, CH<sub>3</sub>), 2.43 (s, 3H, CH<sub>3</sub>), 2.37 (s, 3H, CH<sub>3</sub>), 1.19 (t, *J* = 7.2 Hz, 3H, CH<sub>3</sub>); <sup>13</sup>C NMR (400 MHz, CDCl<sub>3</sub>) δ: 171.5, 170.4, 166.9, 150.7, 139.4, 137.2, 137.2, 136.4, 134.4, 131.3, 131.2, 130.6, 130.2, 127.7, 127.4, 126.7, 126.4, 126.2, 122.3, 119.7, 118.1, 111.0, 109.2, 61.6, 60.3, 47.5, 44.5, 38.7, 28.9, 28.4, 19.7, 19.5, 14.0; IR(KBr) ν: 3379, 3251, 3148, 3033, 2973, 2864, 2173, 1849, 1667, 1618, 1537, 1471, 1365, 1288, 1173, 1151, 982, 907, 866, 755 cm<sup>-1</sup>; MS (*m/z*): HRMS (ESI) Calcd. for C<sub>34</sub>H<sub>33</sub>N<sub>3</sub>O<sub>5</sub> ([M+Na]<sup>+</sup>): 586.2312, found: 586.2314.

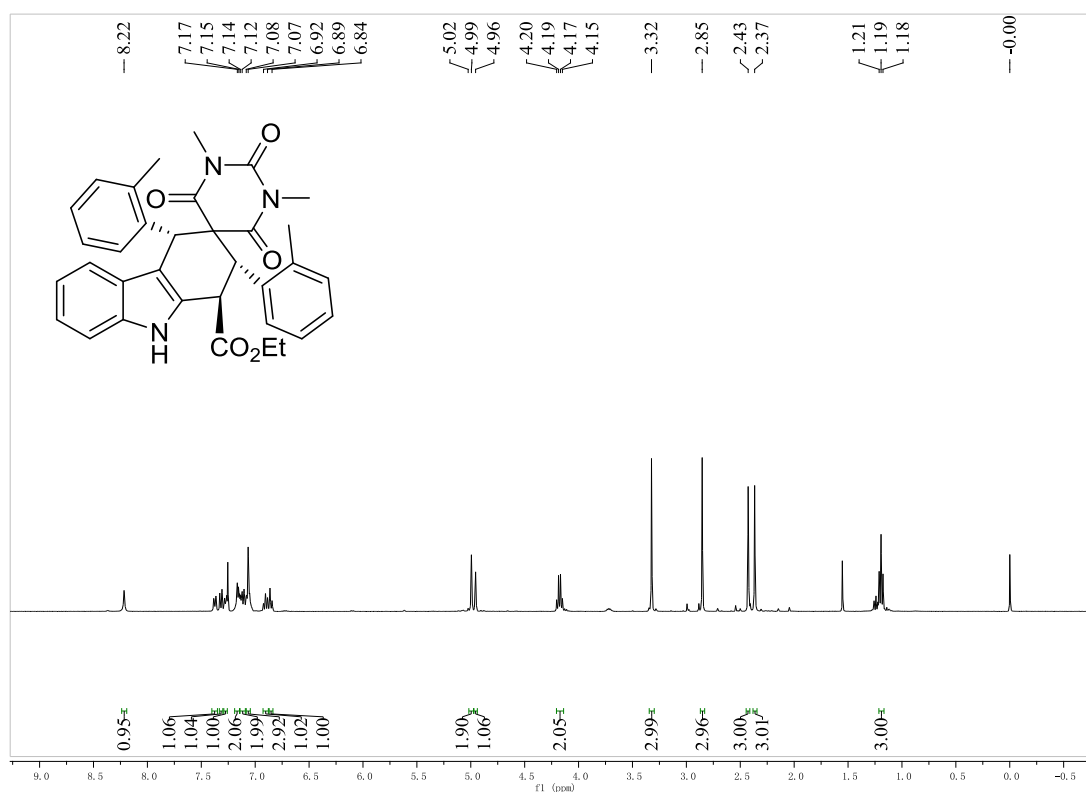

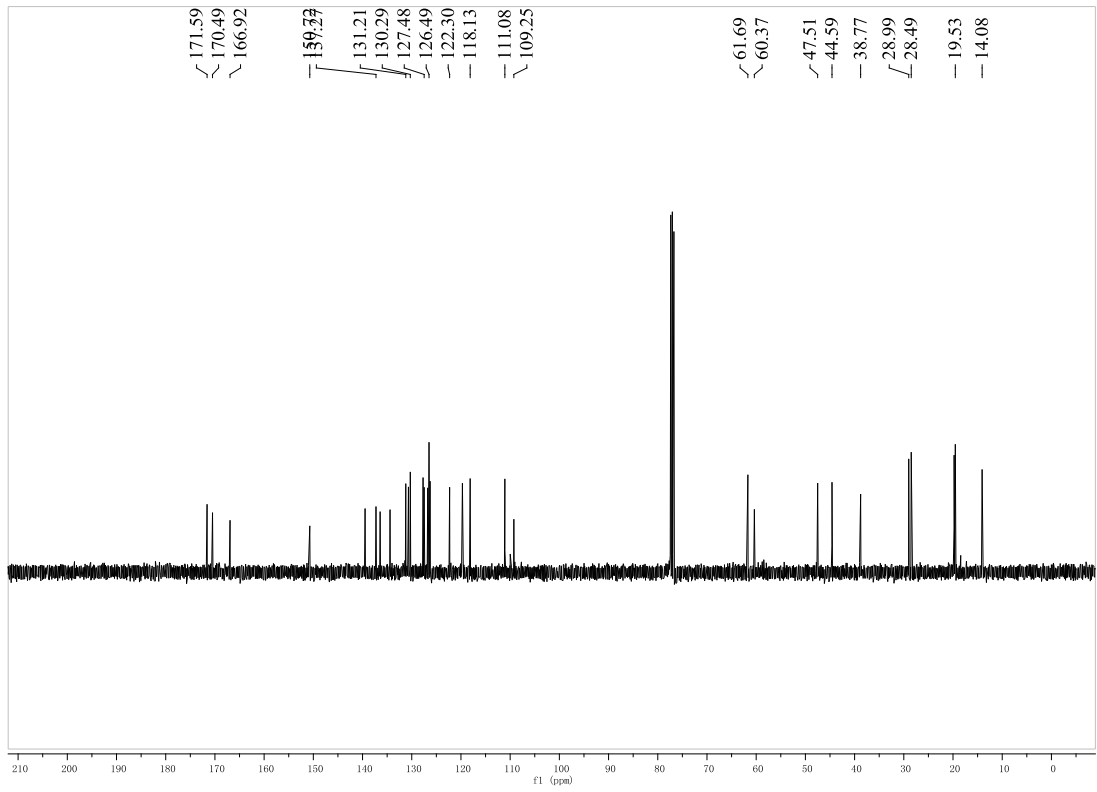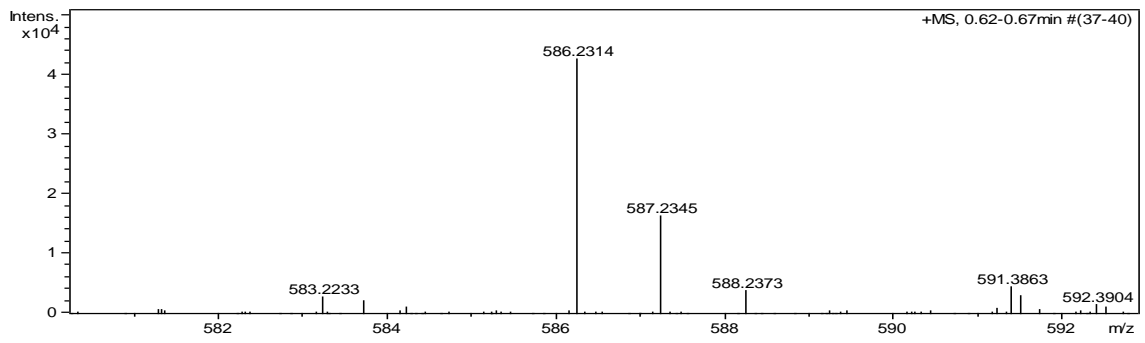

## Ethyl

### *rel*-(1*R*,2*S*,4*R*)-1',3'-dimethyl-2',4',6'-trioxo-2,4-di-*m*-tolyl-1,1',2,3',4,4',6',9-octahydro-2'*H*-spiro[carbazole-3,5'-pyrimidine]-1-carboxylate (**11**):

yellow solid, 77%, m.p. 201-204 °C; <sup>1</sup>H NMR (400 MHz, CDCl<sub>3</sub>) δ: 8.36 (s, 1H, NH), 7.31 (d, *J* = 8.0 Hz, 1H, ArH), 7.26-7.24 (m, 2H, ArH), 7.12-7.03 (m, 5H, ArH), 6.99-6.96 (m, 2H, ArH), 6.94-6.88 (m, 2H, ArH), 5.08 (d, *J* = 10.4 Hz, 1H, CH), 4.62 (d, *J* = 10.4 Hz, 1H, CH), 4.55 (s, 1H, CH), 4.17 (q, *J* = 7.2 Hz, 2H, CH<sub>2</sub>), 3.25 (s, 3H, CH<sub>3</sub>), 2.97 (s, 3H, CH<sub>3</sub>), 2.30 (s, 3H, CH<sub>3</sub>), 2.26 (s, 3H, CH<sub>3</sub>), 1.23 (t, *J* = 7.2 Hz, 3H, CH<sub>3</sub>); <sup>13</sup>C NMR (400 MHz, CDCl<sub>3</sub>) δ: 171.7, 170.2, 167.5, 150.9, 139.4, 138.0, 137.8, 136.4, 135.5, 131.5, 130.9, 129.2, 128.9, 127.2, 127.0, 126.4, 126.3, 122.2, 119.6, 118.3, 110.9, 108.3, 62.1, 61.6, 50.7, 47.8, 37.6, 28.9, 28.8, 21.2, 19.8, 14.0; IR(KBr) ν: 3371, 3213, 3148, 3056, 2972, 2846, 2133, 1892, 1665, 1641, 1572, 1435, 1326, 1287, 1155, 1123, 942, 913, 865, 738 cm<sup>-1</sup>; MS (*m/z*): HRMS (ESI) Calcd. for C<sub>34</sub>H<sub>33</sub>N<sub>3</sub>O<sub>5</sub> ([M+Na]<sup>+</sup>): 586.2312, found: 586.2303.

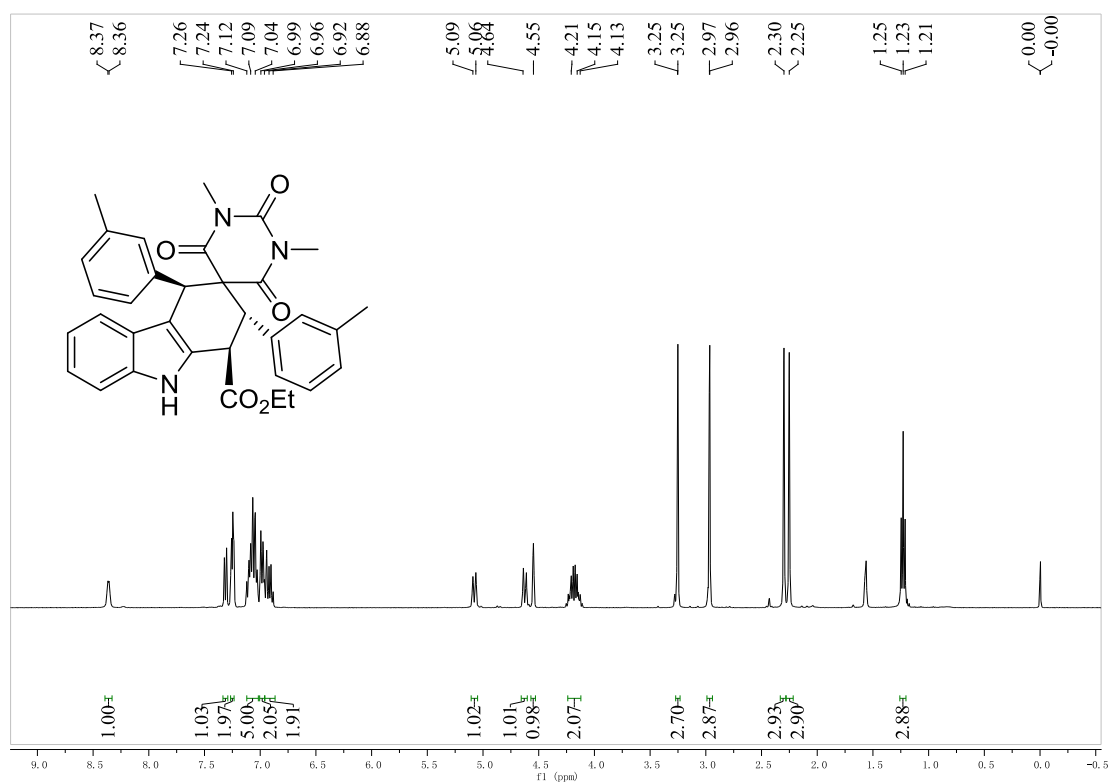

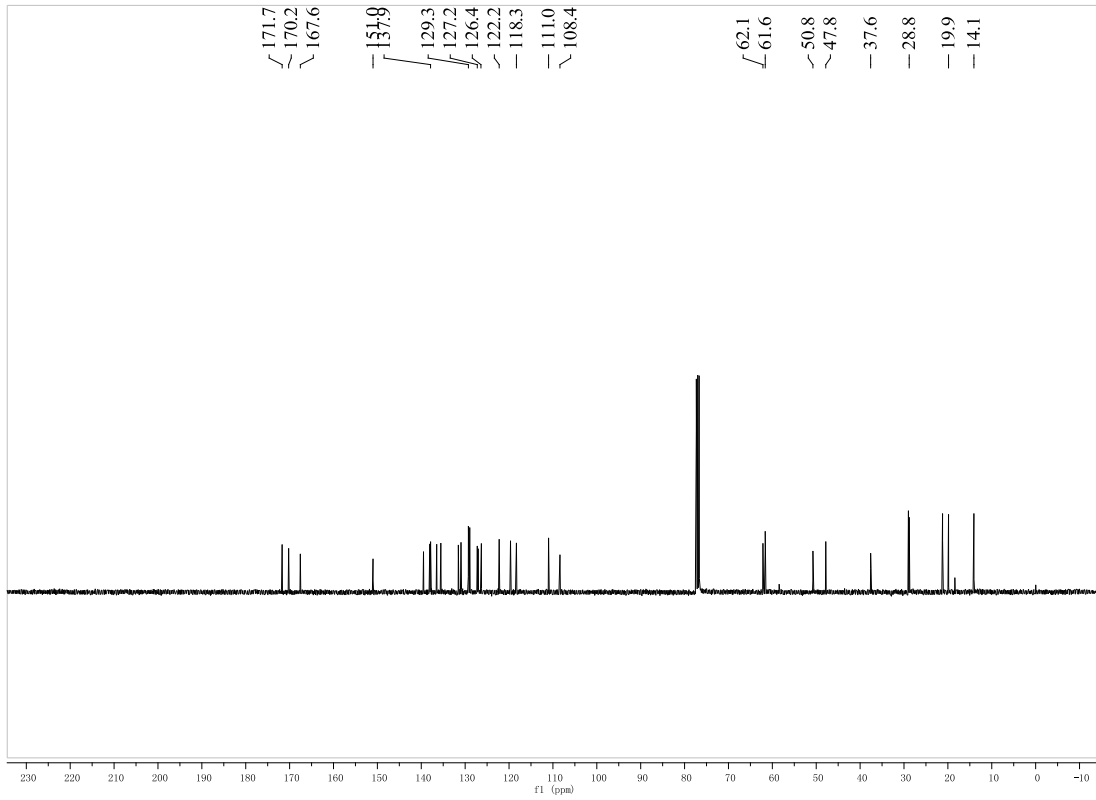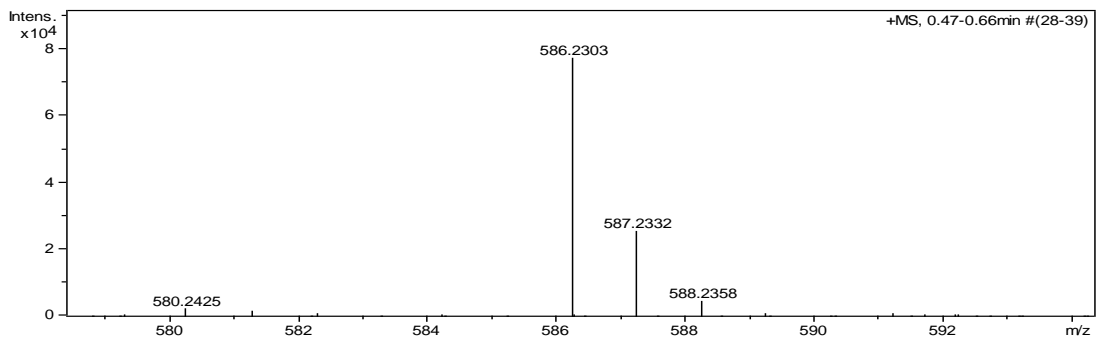

## Ethyl

### *rel*-(1*R*,2*S*,4*S*)-1',3'-dimethyl-2',4',6'-trioxo-2,4-di-*m*-tolyl-1,1',2,3',4,4',6',9-octahydro-2'*H*-spiro[carbazole-3,5'-pyrimidine]-1-carboxylate (11')

yellow solid, 6%, m.p. 213-215 °C; <sup>1</sup>H NMR (400 MHz, CDCl<sub>3</sub>) δ: 8.25 (s, 1H, NH), 7.36 (d, *J* = 6.4 Hz, 1H, ArH), 7.31 (d, *J* = 6.4 Hz, 1H, ArH), 7.12-7.04 (m, 8H, ArH), 6.96-6.89 (m, 2H, ArH), 5.03 (d, *J* = 10.4 Hz, 1H, CH), 4.86 (d, *J* = 10.4 Hz, 1H, CH), 4.59 (s, 1H, CH), 4.17 (q, *J* = 6.8 Hz, 2H, CH<sub>2</sub>), 3.28 (s, 3H, CH<sub>3</sub>), 2.98 (s, 3H, CH<sub>3</sub>), 2.43 (s, 3H, CH<sub>3</sub>), 2.30 (s, 3H, CH<sub>3</sub>), 1.19 (t, *J* = 6.8 Hz, 3H, CH<sub>3</sub>); <sup>13</sup>C NMR (400 MHz, CDCl<sub>3</sub>) δ: 171.2, 169.9, 167.4, 151.0, 137.8, 137.1, 136.4, 135.8, 135.5, 130.6, 130.5, 129.2, 128.9, 128.8, 126.4, 122.2, 119.6, 118.3, 110.9, 107.9, 61.7, 61.6, 50.1, 46.4, 41.7, 28.8, 28.7, 21.1, 20.9, 14.1; IR(KBr) ν: 3359, 3278, 3154, 3066, 2965, 2852, 2148, 1876, 1642, 1612, 1565, 1487, 1345, 1245, 1123, 1111, 999, 945, 865, 742 cm<sup>-1</sup>; MS (*m/z*): HRMS (ESI) Calcd. for C<sub>34</sub>H<sub>33</sub>N<sub>3</sub>O<sub>5</sub> ([M+Na]<sup>+</sup>): 586.2312, found: 586.2303.

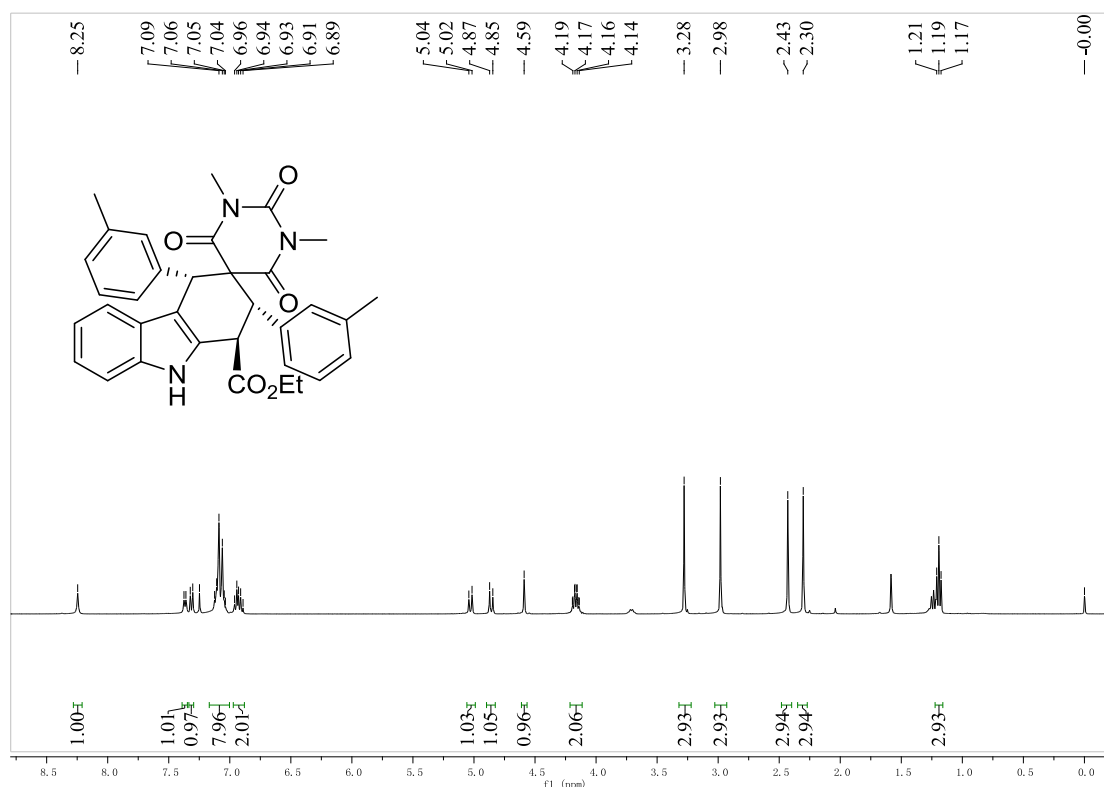



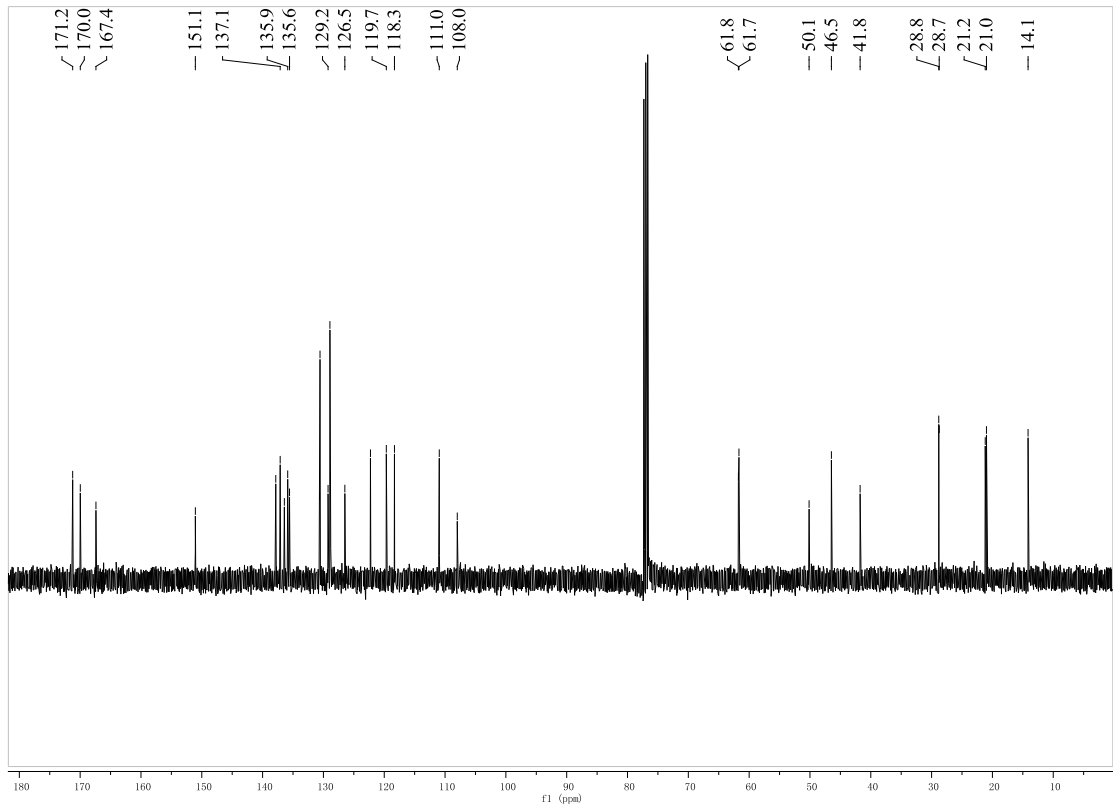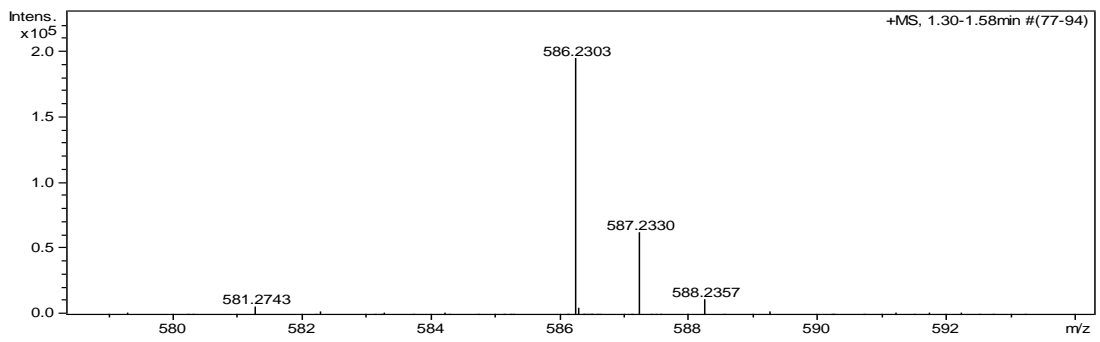

## Ethyl

### *rel*-(1*R*,2*S*,4*R*)-2,4-bis(4-methoxyphenyl)-1',3'-dimethyl-2',4',6'-trioxo-1,1',2,3',4,4',6',9-octahydro-2'*H*-spiro[carbazole-3,5'-pyrimidine]-1-carboxylate (**1m**):

yellow solid, 75%, m.p. 201-204 °C; <sup>1</sup>H NMR (400 MHz, CDCl<sub>3</sub>) δ: 8.34 (s, 1H, NH), 7.32 (d, *J* = 8.0 Hz, 1H, ArH), 7.29 (d, *J* = 8.8 Hz, 2H, ArH), 7.13-7.06 (m, 3H, ArH), 6.96-6.90 (m, 2H, ArH), 6.80 (d, *J* = 8.8 Hz, 2H, ArH), 6.72 (d, *J* = 8.8 Hz, 2H, ArH), 5.06 (d, *J* = 10.8 Hz, 1H, CH), 4.59 (d, *J* = 10.8 Hz, 1H, CH), 4.55 (s, 1H, CH), 4.19 (q, *J* = 7.2 Hz, 2H, CH<sub>2</sub>), 3.76 (s, 3H, OCH<sub>3</sub>), 3.74 (s, 3H, OCH<sub>3</sub>), 3.26 (s, 3H, CH<sub>3</sub>), 2.99 (s, 3H, CH<sub>3</sub>), 1.24 (t, *J* = 7.2 Hz, 3H, CH<sub>3</sub>); <sup>13</sup>C NMR (400 MHz, CDCl<sub>3</sub>) δ: 171.4, 170.0, 167.5, 159.3, 158.7, 151.1, 136.5, 131.8, 130.9, 130.6, 126.4, 122.3, 119.6, 118.3, 113.8, 113.5, 111.0, 108.1, 61.9, 61.7, 55.1, 55.0, 49.8, 46.6, 41.4, 28.8, 28.8, 14.2; IR(KBr) ν: 3345, 3267, 3132, 3017, 2960, 2833, 2140, 1873, 1641, 1601, 1514, 1411, 1372, 1255, 1146, 1137, 967, 941, 871, 765 cm<sup>-1</sup>; MS (*m/z*): HRMS (ESI) Calcd. for C<sub>34</sub>H<sub>33</sub>N<sub>3</sub>O<sub>7</sub> ([M+Na]<sup>+</sup>): 618.2211, found: 618.2214.

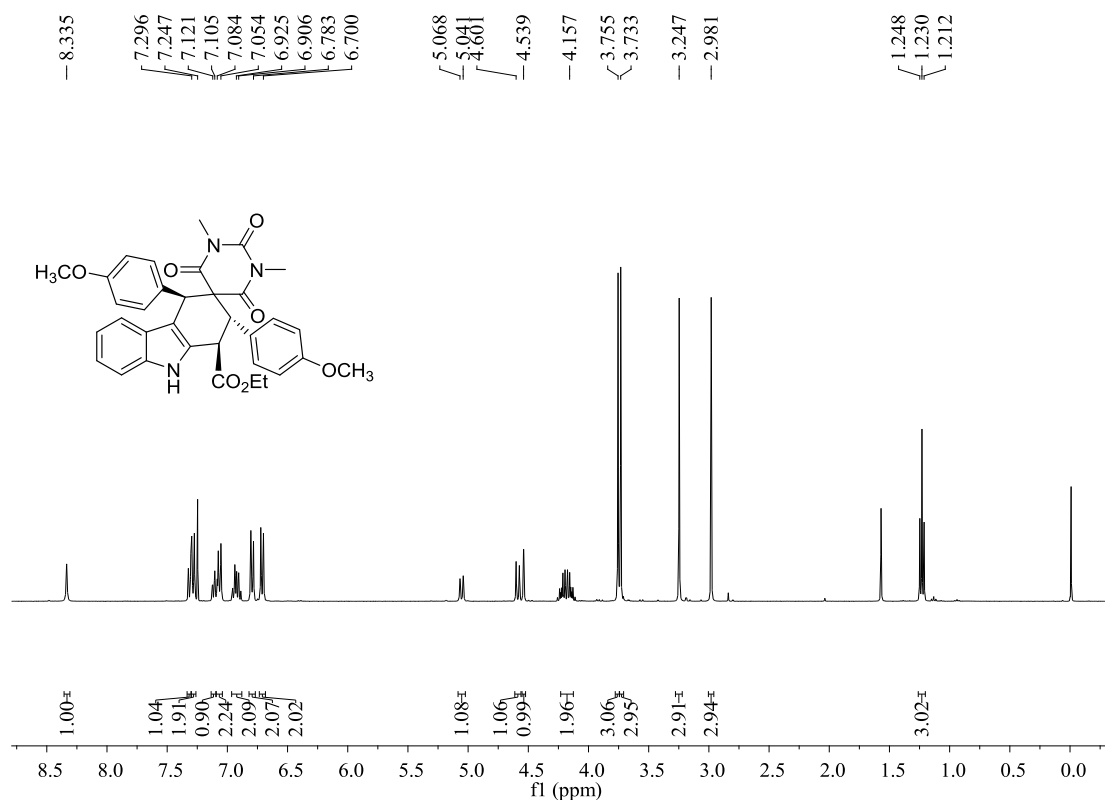

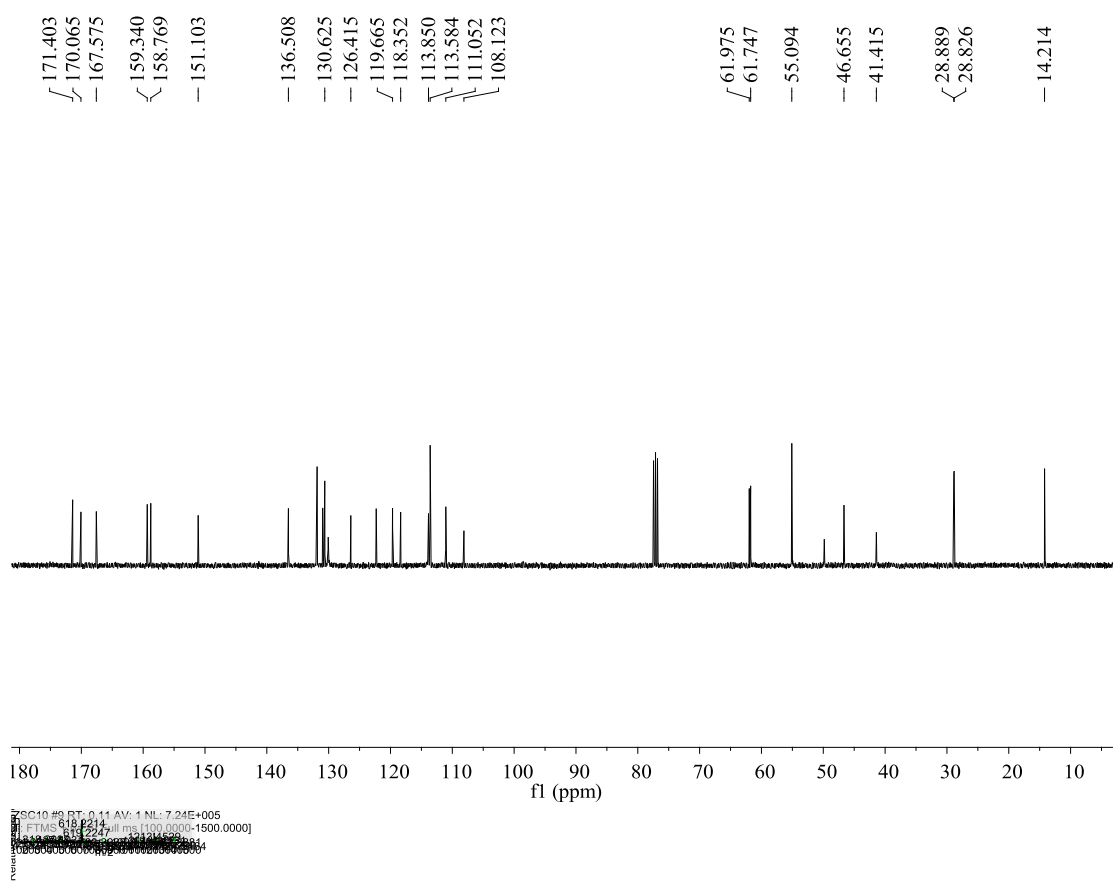

## Ethyl

### *rel*-(1*R*,2*S*,4*R*)-2,4-bis(3-methoxyphenyl)-1',3'-dimethyl-2',4',6'-trioxo-1,1',2,3',4,4',6',9-octahydro-2'*H*-spiro[carbazole-3,5'-pyrimidine]-1-carboxylate (1n):

yellow solid, 70%, m.p. 209-213 °C; <sup>1</sup>H NMR (400 MHz, CDCl<sub>3</sub>) δ: 8.39 (s, 1H, NH), 7.30 (d, *J* = 8.0 Hz, 1H, ArH), 7.19 (t, *J* = 8.0 Hz, 1H, ArH), 7.10 (t, *J* = 8.0 Hz, 2H, ArH), 7.00-6.90 (m, 4H, ArH), 6.81-6.71 (m, 4H, ArH), 5.07 (d, *J* = 10.4 Hz, 1H, CH), 4.68 (d, *J* = 10.8 Hz, 1H, CH), 4.55 (s, 1H, CH), 4.18 (q, *J* = 7.2 Hz, 2H, CH<sub>2</sub>), 3.73 (s, 3H, OCH<sub>3</sub>), 3.71 (s, 3H, OCH<sub>3</sub>), 3.26 (s, 3H, CH<sub>3</sub>), 3.00 (s, 3H, CH<sub>3</sub>), 1.23 (t, *J* = 7.2 Hz, 3H, CH<sub>3</sub>); <sup>13</sup>C NMR (400 MHz, CDCl<sub>3</sub>) δ: 171.2, 169.8, 167.1, 151.0, 140.3, 140.2, 136.4, 130.6, 129.3, 129.1, 126.4, 123.1, 122.3, 121.3, 119.7, 118.2, 116.2, 115.2, 113.2, 111.0, 107.7, 61.7, 61.5, 55.1, 50.3, 46.5, 42.2, 28.8, 28.8, 14.1; IR(KBr) ν: 3372, 3264, 3138, 3072, 2946, 2831, 2172, 1862, 1655, 1638, 1571, 1467, 1352, 1261, 1178, 1121, 973, 952, 834, 721 cm<sup>-1</sup>; MS (*m/z*): HRMS (ESI) Calcd. for C<sub>34</sub>H<sub>33</sub>N<sub>3</sub>O<sub>7</sub> ([M+Na]<sup>+</sup>): 618.2211, found: 618.2191.

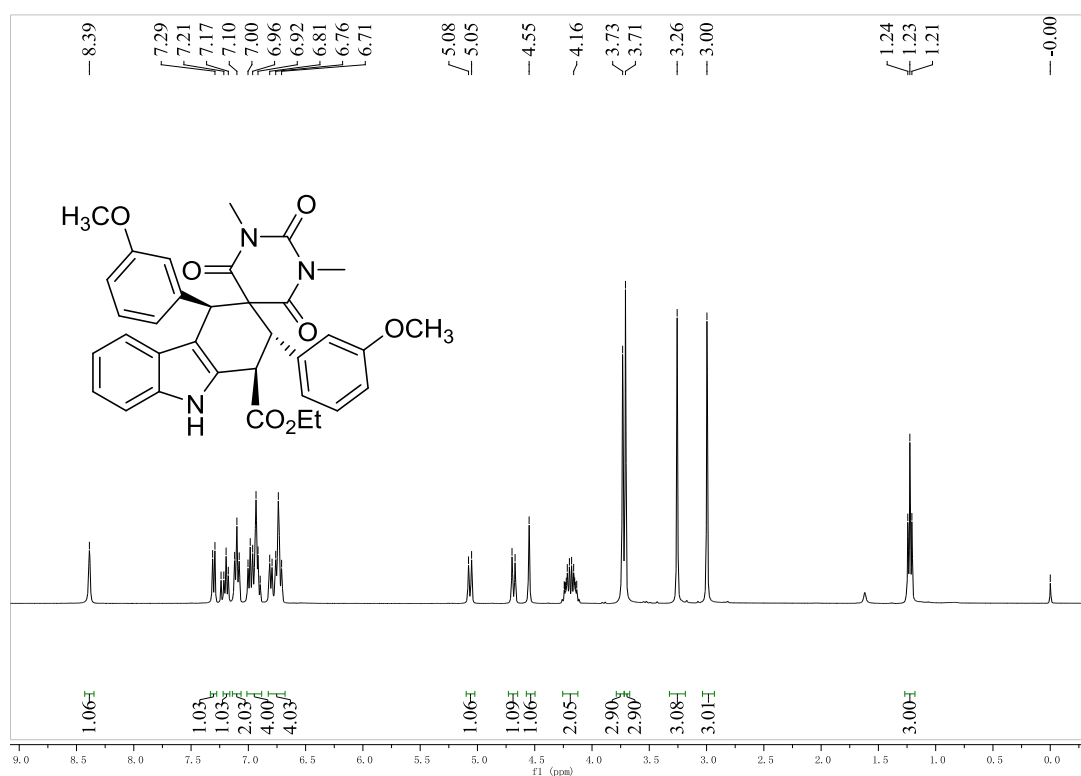

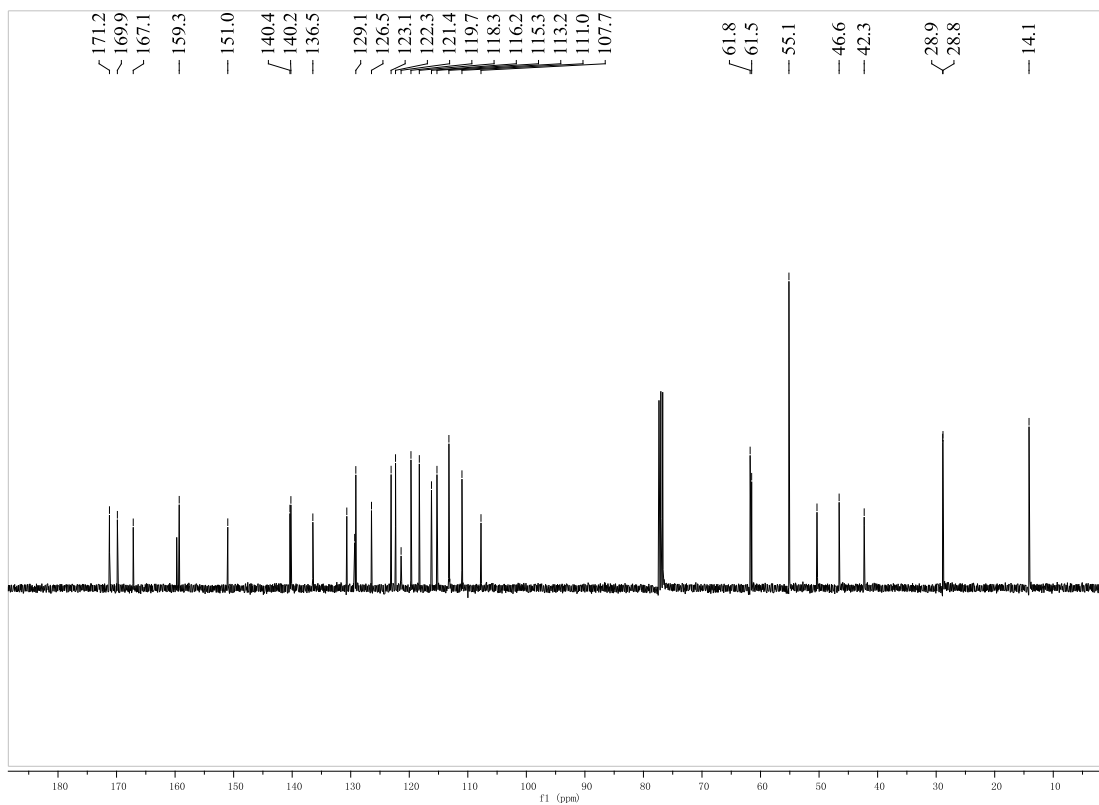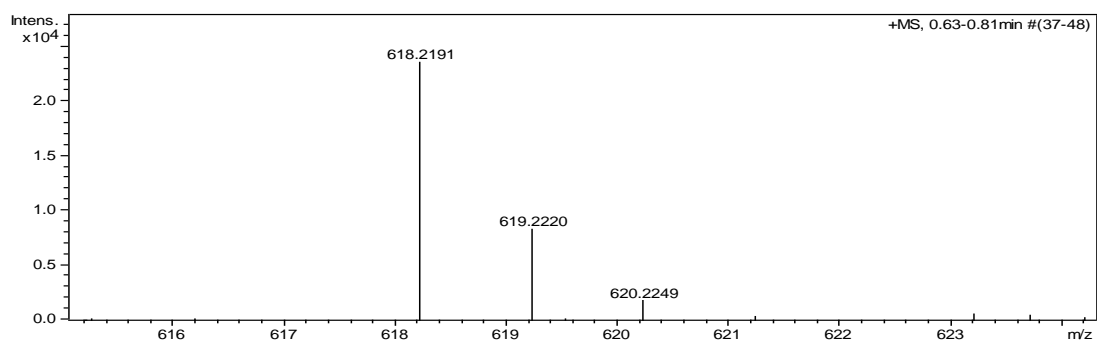

## Ethyl

### *rel*-(1*R*,2*R*,4*R*)-2,4-bis(2-chlorophenyl)-1',3'-dimethyl-2',4',6'-trioxo-1,1',2,3',4,4',6',9-octahydro-2'*H*-spiro[carbazole-3,5'-pyrimidine]-1-carboxylate (1o):

yellow solid, 72%, m.p. 214-216 °C; <sup>1</sup>H NMR (400 MHz, CDCl<sub>3</sub>) δ: 8.55 (s, 1H, NH), 7.45-7.39 (m, 2H, ArH), 7.34 (d, *J* = 8.4 Hz, 1H, ArH), 7.26-7.22 (m, 1H, ArH), 7.20-7.16 (m, 1H, ArH), 7.09 (t, *J* = 7.6 Hz, 2H, ArH), 7.04 (t, *J* = 8.4 Hz, 1H, ArH), 6.91 (dd, *J*<sub>1</sub> = 8.0 Hz, *J*<sub>2</sub> = 1.6 Hz, 1H, ArH), 6.85 (dd, *J*<sub>1</sub> = 8.0 Hz, *J*<sub>2</sub> = 1.2 Hz, 1H, ArH), 6.76 (t, *J* = 7.2 Hz, 1H, ArH), 6.19 (d, *J* = 8.0 Hz, 1H, ArH), 5.66 (s, 1H, CH), 5.12 (d, *J* = 6.8 Hz, 1H, CH), 4.64 (d, *J* = 10.8 Hz, 1H, CH), 4.04 (q, *J* = 7.2 Hz, 2H, CH<sub>2</sub>), 3.11 (s, 3H, CH<sub>3</sub>), 2.91 (s, 3H, CH<sub>3</sub>), 1.02 (t, *J* = 7.2 Hz, 3H, CH<sub>3</sub>); <sup>13</sup>C NMR (400 MHz, CDCl<sub>3</sub>) δ: 170.1, 169.3, 168.6, 150.2, 137.1, 136.8, 134.2, 132.4, 131.8, 130.0, 129.8, 129.6, 128.5, 128.2, 126.4, 126.2, 125.4, 122.0, 119.4, 119.2, 110.9, 108.0, 60.7, 57.5, 48.9, 45.5, 40.6, 29.3, 28.2, 13.8; IR(KBr) ν: 3341, 3257, 3103, 2941, 2856, 2143, 1817, 1643, 1622, 1556, 1454, 1367, 1249, 1165, 1148, 945, 912, 864, 751 cm<sup>-1</sup>; MS (*m/z*): HRMS (ESI) Calcd. for C<sub>32</sub>H<sub>27</sub>Cl<sub>2</sub>N<sub>3</sub>O<sub>5</sub> ([M+Na]<sup>+</sup>):626.1220, found: 626.1224.

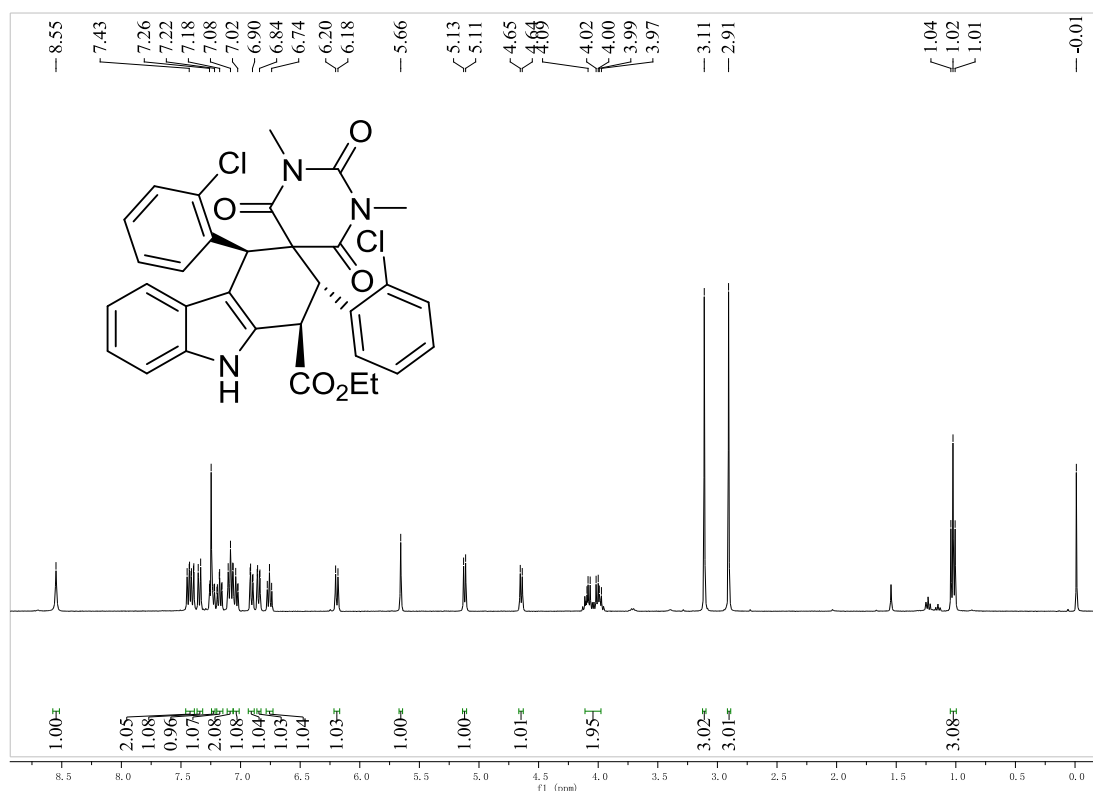

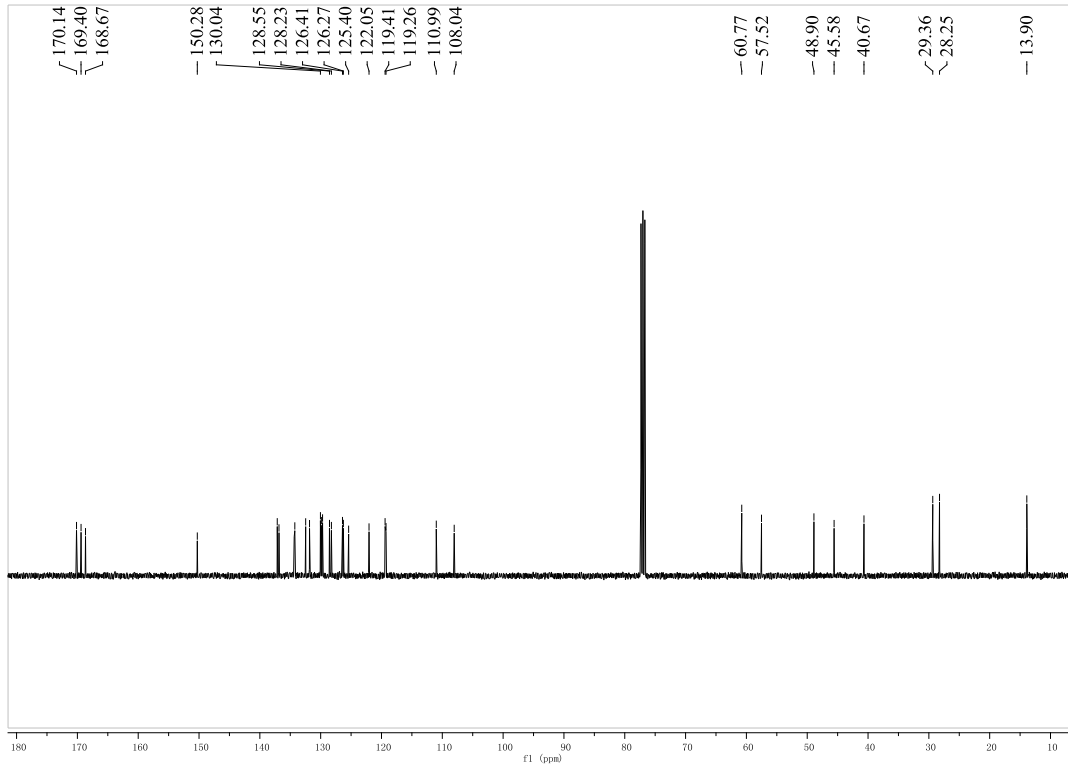

ZGC11 #9 DT: 0.11 AV: 1 NL: 8.42E+005  
 11 ETMS: 628.1228 (ms [100.0000-1500.0000])  
 11.11.09.2004.12.27  
 0000000000000000000000000000000000

## Ethyl

### *rel*-(1*R*,2*S*,4*R*)-1',3'-dimethyl-2,4-bis(4-nitrophenyl)-2',4',6'-trioxo-1,1',2,3',4,4',6',9-octahydro-*o*-2'*H*-spiro[carbazole-3,5'-pyrimidine]-1-carboxylate (1p):

yellow solid, 63%, m.p. 206-209 °C; <sup>1</sup>H NMR (400 MHz, CDCl<sub>3</sub>) δ: 8.65 (s, 1H, NH), 8.22 (dd, *J*<sub>1</sub> = 8.4 Hz, *J*<sub>2</sub> = 2.4 Hz, 1H, ArH), 8.14 (d, *J* = 8.4 Hz, 2H, ArH), 8.04 (dd, *J*<sub>1</sub> = 8.4 Hz, *J*<sub>2</sub> = 2.4 Hz, 1H, ArH), 7.44-7.40 (m, 4H, ArH), 7.17-7.11 (m, 2H, ArH), 6.84 (t, *J* = 8.0 Hz, 1H, ArH), 6.22 (d, *J* = 8.0 Hz, 1H, ArH), 5.38 (d, *J* = 2.0 Hz, 1H, CH), 5.12 (dd, *J*<sub>1</sub> = 10.6 Hz, *J*<sub>2</sub> = 2.0 Hz, 1H, CH), 4.71 (d, *J* = 10.6 Hz, 1H, CH), 4.15 (q, *J* = 7.2 Hz, 2H, CH<sub>2</sub>), 3.01 (s, 3H, CH<sub>3</sub>), 2.84 (s, 3H, CH<sub>3</sub>), 1.17 (t, *J* = 7.2 Hz, 3H, CH<sub>3</sub>); <sup>13</sup>C NMR (400 MHz, CDCl<sub>3</sub>) δ: 170.2, 169.7, 168.9, 166.8, 150.2, 147.8, 147.4, 145.7, 145.4, 136.4, 131.8, 129.9, 125.6, 123.8, 123.5, 123.1, 120.3, 117.8, 111.3, 111.3, 109.9, 62.4, 61.1, 45.8, 29.2, 29.0, 14.2; IR(KBr) ν: 3342, 3255, 3167, 3041, 2951, 2841, 2163, 1826, 1661, 1643, 1565, 1432, 1355, 1248, 1163, 1153, 963, 948, 827, 761 cm<sup>-1</sup>; MS (*m/z*): HRMS (ESI) Calcd. for C<sub>32</sub>H<sub>27</sub>N<sub>5</sub>O<sub>9</sub> ([M+H]<sup>+</sup>): 678.1701, found: 678.1703.

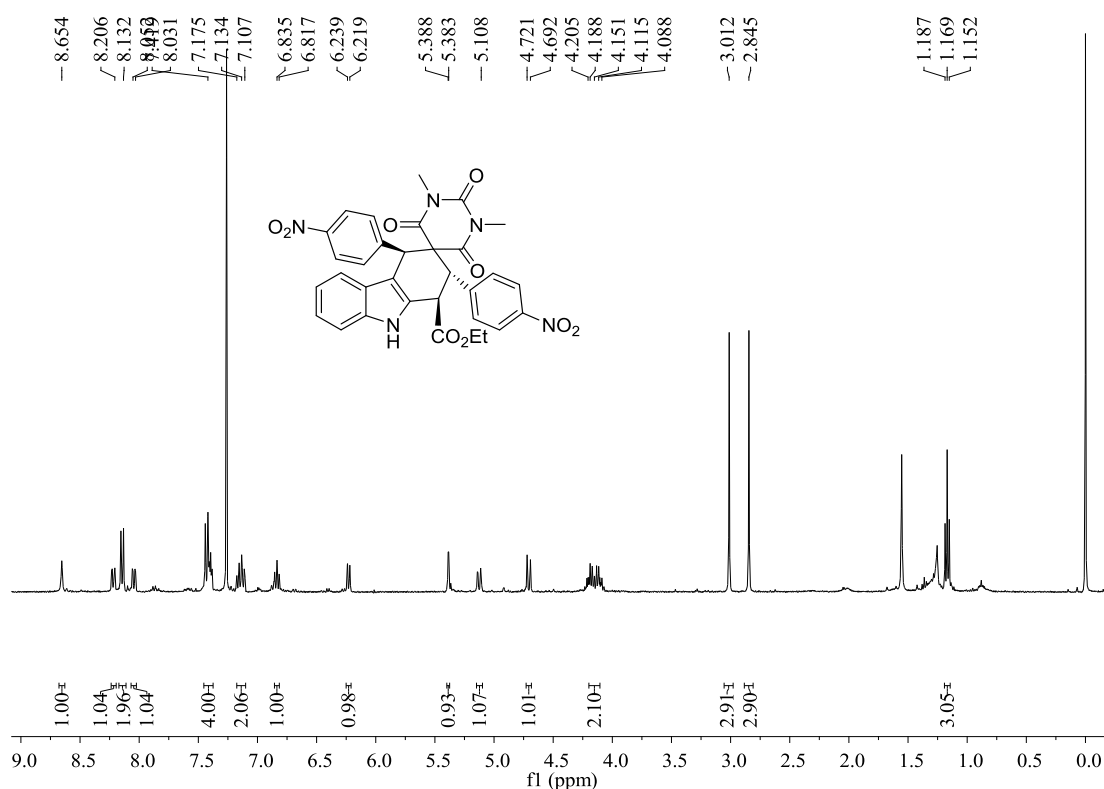





## Ethyl

### *rel*-(1*R*,2*S*,4*S*)-1',3'-dimethyl-2,4-bis(4-nitrophenyl)-2',4',6'-trioxo-1,1',2,3',4,4',6',9-octahydro-*o*-2'*H*-spiro[carbazole-3,5'-pyrimidine]-1-carboxylate (1p')

yellow solid, 9%, m.p. 209-213 °C; <sup>1</sup>H NMR (400 MHz, CDCl<sub>3</sub>) δ: 8.48 (s, 1H, NH), 8.17 (d, *J* = 8.8 Hz, 2H, ArH), 8.08 (d, *J* = 8.8 Hz, 2H, ArH), 7.57 (d, *J* = 8.8 Hz, 2H, ArH), 7.39 (d, *J* = 8.4 Hz, 1H, ArH), 7.35 (d, *J* = 8.8 Hz, 2H, ArH), 7.18 (t, *J* = 8.0 Hz, 1H, ArH), 6.96 (t, *J* = 7.2 Hz, 1H, ArH), 6.89 (d, *J* = 8.0 Hz, 1H, ArH), 5.12 (d, *J* = 10.4 Hz, 1H, CH), 4.75 (d, *J* = 10.4 Hz, 1H, CH), 4.72 (s, 1H, CH), 4.24 (q, *J* = 7.2 Hz, 2H, CH<sub>2</sub>), 3.30 (s, 3H, CH<sub>3</sub>), 3.02 (s, 3H, CH<sub>3</sub>), 1.28 (t, *J* = 7.2 Hz, 3H, CH<sub>3</sub>); <sup>13</sup>C NMR (400 MHz, CDCl<sub>3</sub>) δ: 170.0, 169.7, 167.2, 148.9, 147.9, 147.7, 144.5, 143.9, 136.0, 130.2, 129.9, 129.9, 129.8, 125.3, 123.8, 123.7, 123.3, 122.3, 119.8, 119.3, 111.3, 106.5, 62.3, 62.2, 50.8, 48.4, 44.6, 28.6, 28.0, 14.0; IR(KBr) ν: 3342, 3241, 3167, 3041, 2938, 2841, 2163, 1826, 1661, 1631, 1565, 1432, 1355, 1248, 1178, 1153, 963, 948, 827, 761 cm<sup>-1</sup>; MS (*m/z*): HRMS (ESI) Calcd. for C<sub>32</sub>H<sub>27</sub>N<sub>5</sub>O<sub>9</sub> ([M+Na]<sup>+</sup>): 648.1701, found: 648.1705.

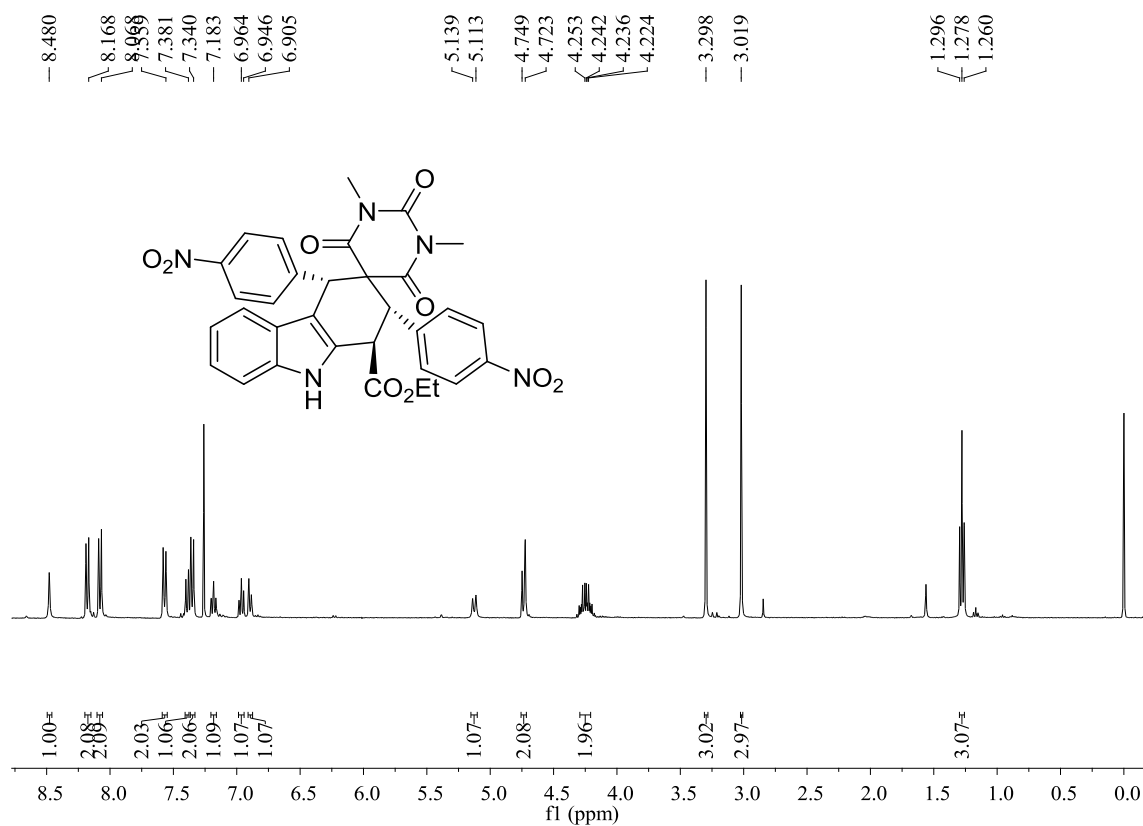

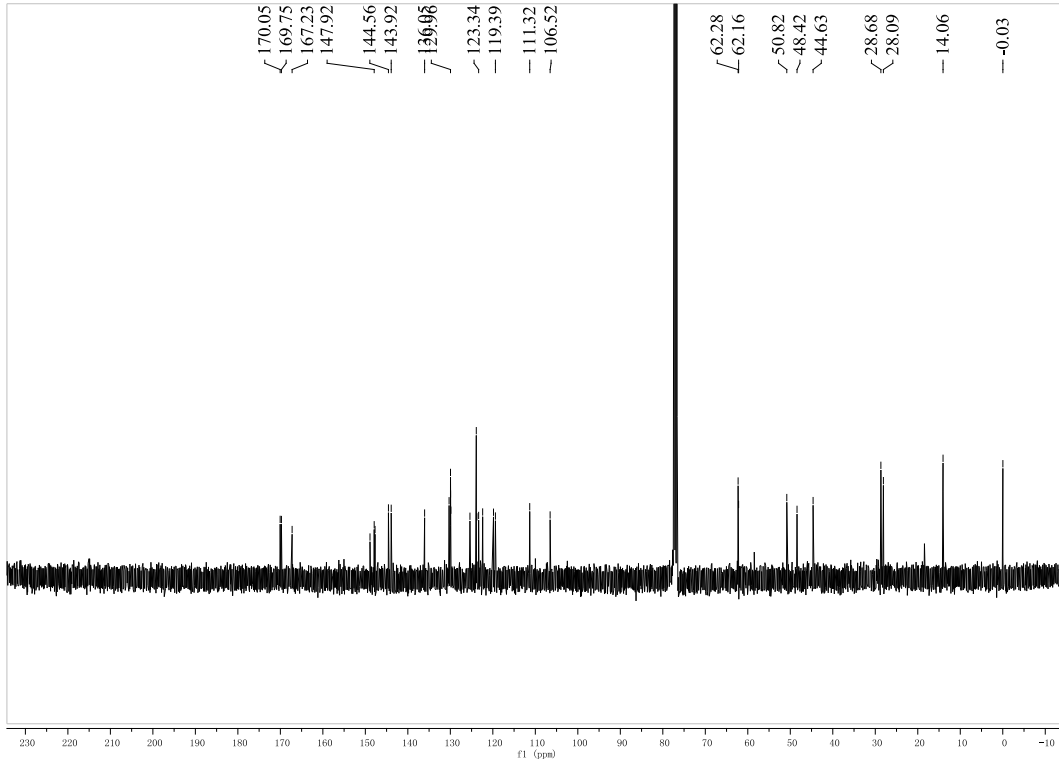

Z:\CC14 #98 RT: 0.44 AV: 1 NL: 4.12E+005  
 [1.000000-644.1705] ms [100.0000-1500.0000]  
 0.44483296010984 4.40800000000000  
 0.0000000000000000 0.0000000000000002  
 Name:

## Ethyl

### *rel*-(1*R*,2*S*,4*R*)-1',3'-dimethyl-2,4-bis(3-nitrophenyl)-2',4',6'-trioxo-1,1',2,3',4,4',6',9-octahydro-*o*-2'H-spiro[carbazole-3,5'-pyrimidine]-1-carboxylate (**1q**):

yellow solid, 63%, m.p. 221-224 °C; <sup>1</sup>H NMR (400 MHz, CDCl<sub>3</sub>) δ: 8.53 (s, 1H, NH), 8.27 (s, 1H, ArH), 8.20-8.18 (m, 1H, ArH), 8.10-8.06 (m, 2H, ArH), 7.72 (d, *J* = 8.0 Hz, 1H, ArH), 7.52-7.50 (m, 2H, ArH), 7.41 (t, *J* = 8.0 Hz, 2H, ArH), 7.21-7.17 (m, 1H, ArH), 6.98-6.96 (m, 2H, ArH), 5.15 (d, *J* = 10.4 Hz, 1H, CH), 4.76 (s, 1H, CH), 4.71 (d, *J* = 10.4 Hz, 1H, CH), 4.26 (q, *J* = 7.2 Hz, 2H, CH<sub>2</sub>), 3.31 (s, 3H, CH<sub>3</sub>), 3.04 (s, 3H, CH<sub>3</sub>), 1.28 (t, *J* = 7.2 Hz, 3H, CH<sub>3</sub>); <sup>13</sup>C NMR (400 MHz, CDCl<sub>3</sub>) δ: 170.3, 168.9, 167.2, 150.4, 148.2, 140.7, 140.2, 137.3, 136.5, 130.3, 129.7, 129.3, 125.6, 125.4, 123.5, 123.0, 123.0, 120.2, 117.7, 111.4, 62.4, 61.3, 46.3, 29.2, 28.9, 14.1; IR(KBr) ν: 3369, 3244, 3157, 3032, 2934, 2857, 2163, 1843, 1631, 1611, 1562, 1483, 1346, 1231, 1159, 1146, 933, 902, 846, 751 cm<sup>-1</sup>; MS (*m/z*): HRMS (ESI) Calcd. for C<sub>32</sub>H<sub>27</sub>N<sub>5</sub>O<sub>9</sub> ([M+Na]<sup>+</sup>): 648.1701, found: 648.1704.

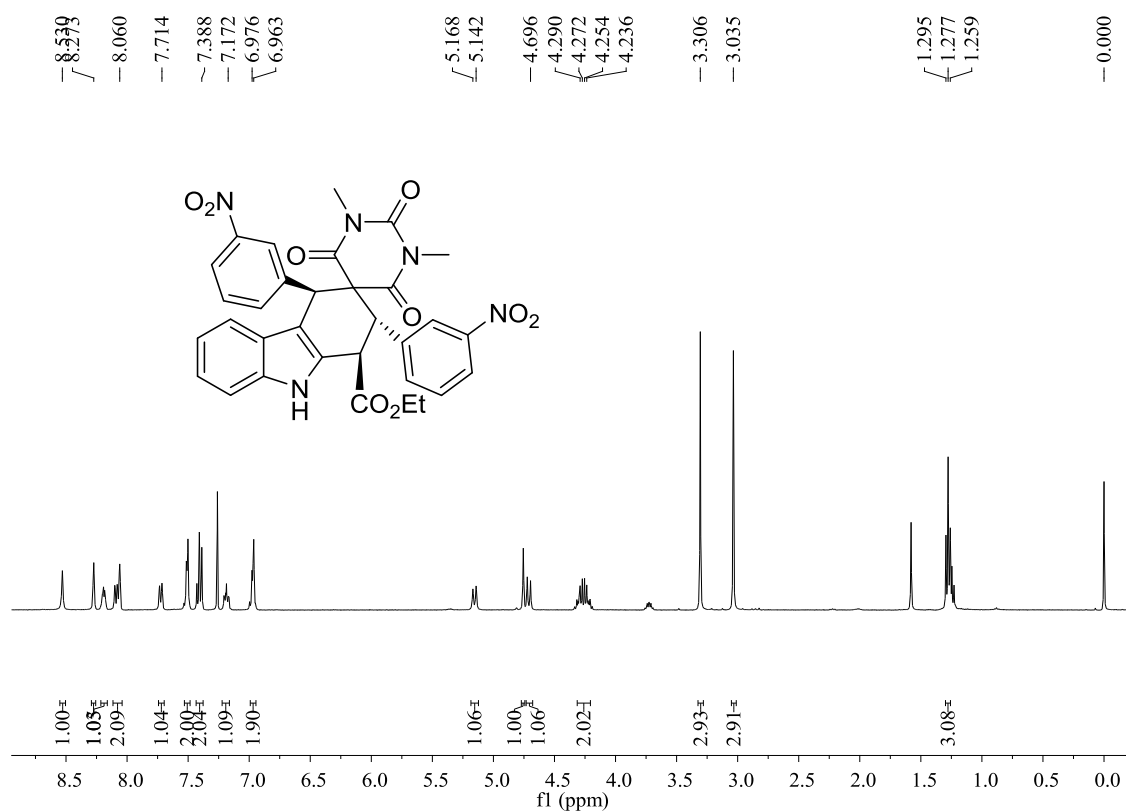



## Ethyl

### *rel*-(1*R*,2*S*,4*R*)-2,4-bis(4-fluorophenyl)-1',3'-dimethyl-2',4',6'-trioxo-1,1',2,3',4,4',6',9-octahydro-2'*H*-spiro[carbazole-3,5'-pyrimidine]-1-carboxylate (1*r*):

yellow solid, 65%, m.p. 212-214 °C; <sup>1</sup>H NMR (400 MHz, CDCl<sub>3</sub>) δ: 8.59 (s, 1H, NH), 7.37 (d, *J* = 8.0 Hz, 1H, ArH), 7.13 (d, *J* = 7.2 Hz, 2H, ArH), 7.11-7.03 (m, 3H, ArH), 6.96 (t, *J* = 8.4 Hz, 2H, ArH), 6.89 (t, *J* = 8.4 Hz, 2H, ArH), 6.81 (t, *J* = 8.0 Hz, 1H, ArH), 6.34 (d, *J* = 8.0 Hz, 1H, ArH), 5.04 (s, 1H, CH), 4.58 (d, *J* = 6.8 Hz, 1H, CH), 4.30 (d, *J* = 6.8 Hz, 1H, CH), 4.05 (q, *J* = 7.2 Hz, 2H, CH<sub>2</sub>), 3.06 (s, 3H, CH<sub>3</sub>), 2.93 (s, 3H, CH<sub>3</sub>), 1.08 (t, *J* = 7.2 Hz, 3H, CH<sub>3</sub>); <sup>13</sup>C NMR (400 MHz, CDCl<sub>3</sub>) δ: 170.9, 169.6, 168.0, 160.4, 150.0, 136.7, 134.6, 134.6, 132.2, 132.0, 132.0, 130.9, 130.8, 130.3, 130.3, 130.2, 130.2, 125.5, 122.0, 119.9, 119.2, 115.2, 115.0, 111.0, 108.1, 60.9, 58.8, 53.5, 49.1, 44.2, 28.4, 28.1, 13.9; IR(KBr) ν: 3361, 3257, 3143, 3066, 2917, 2857, 2163, 1874, 1666, 1621, 1588, 1493, 1367, 1288, 1165, 1134, 951, 967, 855, 787 cm<sup>-1</sup>; MS (*m/z*): HRMS (ESI) Calcd. for C<sub>32</sub>H<sub>27</sub>F<sub>2</sub>N<sub>3</sub>O<sub>5</sub> ([M+Na]<sup>+</sup>): 594.1811, found: 594.1812.

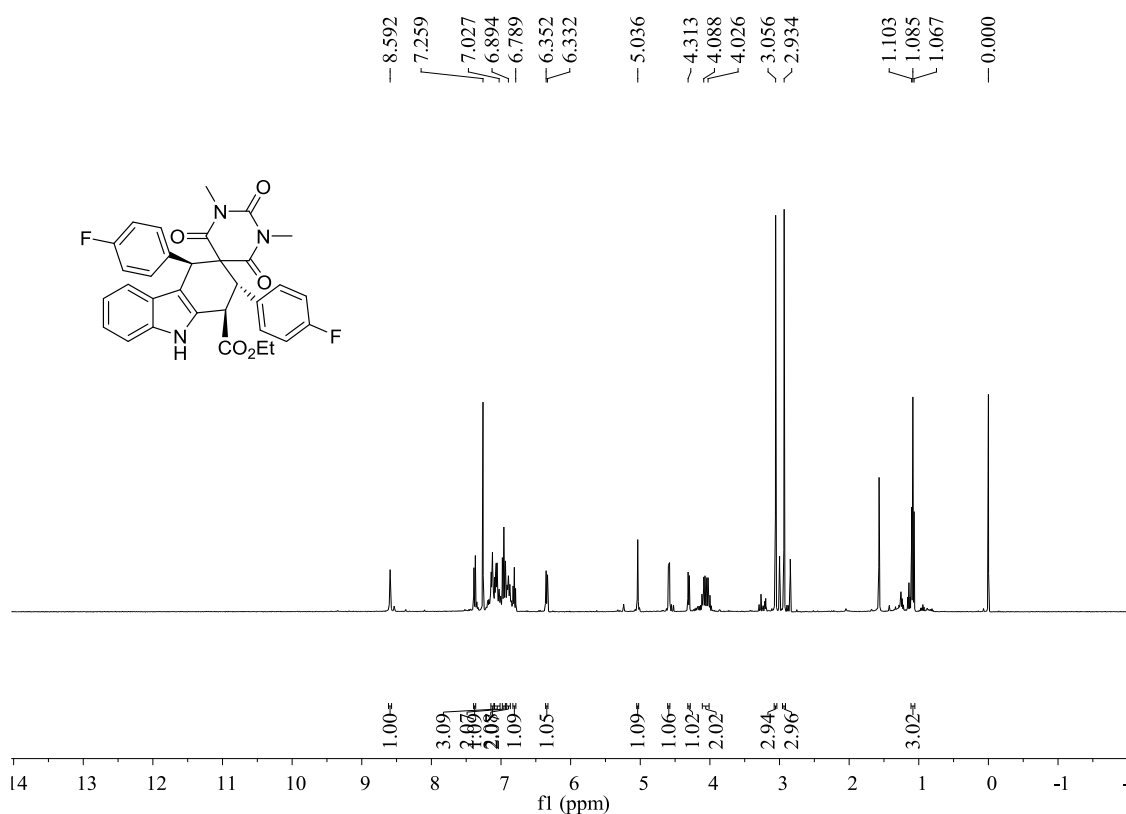



## Ethyl

### *rel*-(1*S*,2*R*,4*S*)-2',6'-dioxo-2,4-diphenyl-1,2,4,9-tetrahydrospiro[carbazole-3,1'-cyclohexane]-1-carboxylate (**2a**):

White solid, 76%, m.p. 175-178 °C; <sup>1</sup>H NMR (400 MHz, CDCl<sub>3</sub>) δ: 8.47 (s, 1H, NH), 7.33 (d, *J* = 7.64 Hz, 2H, ArH), 7.27-7.22 (m, 5H, ArH), 7.16-7.15 (m, 3H, ArH), 7.07 (t, *J* = 7.2 Hz, 1H, ArH), 6.86 (d, *J* = 7.6 Hz, 1H, ArH), 6.76 (d, *J* = 7.2 Hz, 1H, ArH), 6.32 (d, *J* = 8.0 Hz, 1H, ArH), 5.20 (s, 1H, CH), 5.09 (d, *J* = 11.2 Hz, 1H, CH), 4.22 (d, *J* = 11.2 Hz, 1H, CH), 4.07 (q, *J* = 6.8 Hz, 2H, CH<sub>2</sub>), 2.01-1.96 (m, 2H, CH<sub>2</sub>), 1.60-1.54 (m, 1H, CH), 1.48-1.44 (m, 1H, CH), 1.09 (t, *J* = 6.8 Hz, 3H, CH<sub>3</sub>), 0.73-0.71 (m, 2H, CH<sub>2</sub>); <sup>13</sup>C NMR (400 MHz, CDCl<sub>3</sub>) δ: 213.03, 211.34, 171.20, 138.24, 137.87, 136.10, 130.58, 130.18, 130.13, 129.56, 128.72, 128.60, 128.44, 127.74, 127.72, 126.36, 121.41, 120.14, 118.92, 110.82, 109.23, 72.00, 61.51, 50.03, 49.68, 45.34, 42.89, 41.42, 14.61, 13.97; IR (KBr) ν: 3407, 3164, 2977, 1853, 1746, 1631, 1613, 1555, 1431, 1317, 1300, 1285, 1184, 906, 867 cm<sup>-1</sup>; MS (*m/z*): HRMS (ESI) Calcd. for C<sub>32</sub>H<sub>29</sub>NO<sub>4</sub>([M+H]<sup>+</sup>): 514.1989, found: 514.1988.

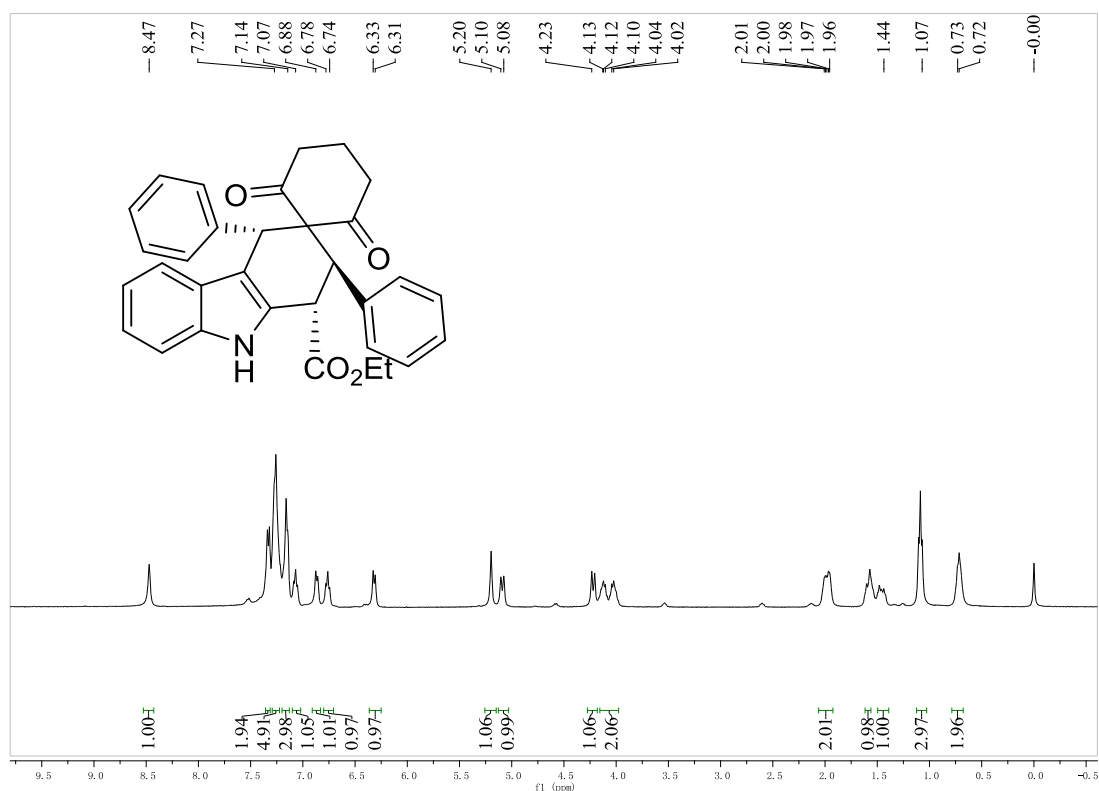



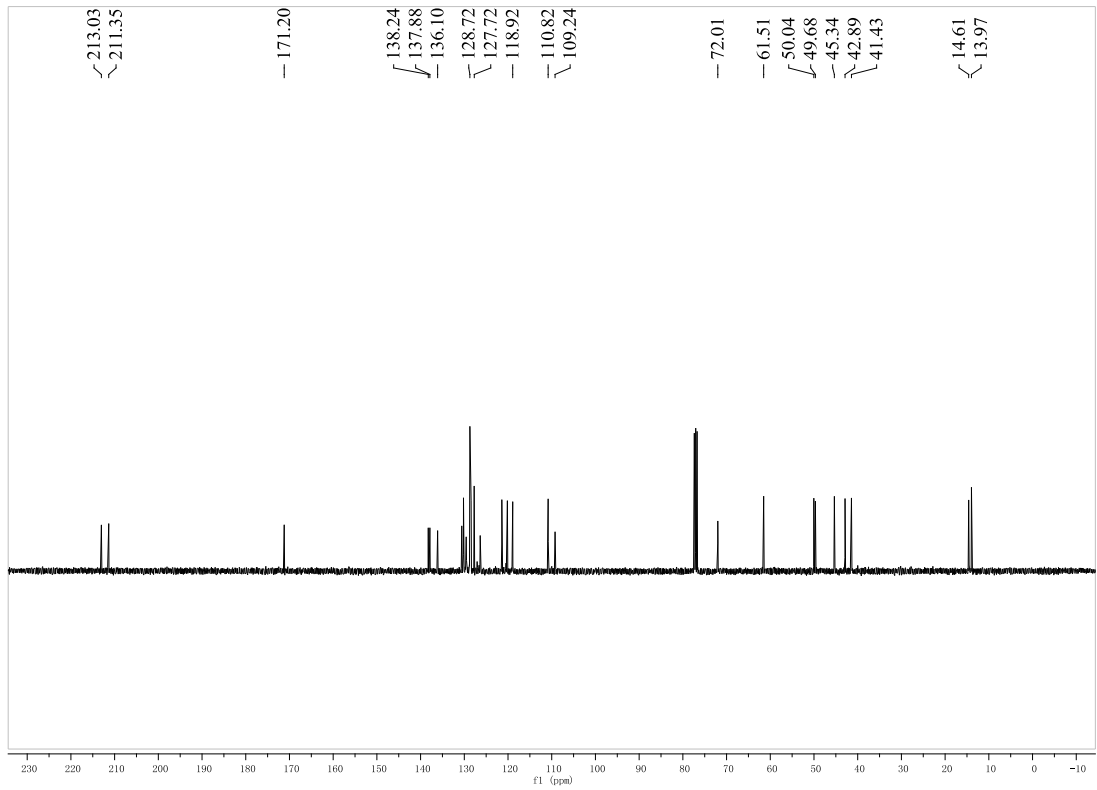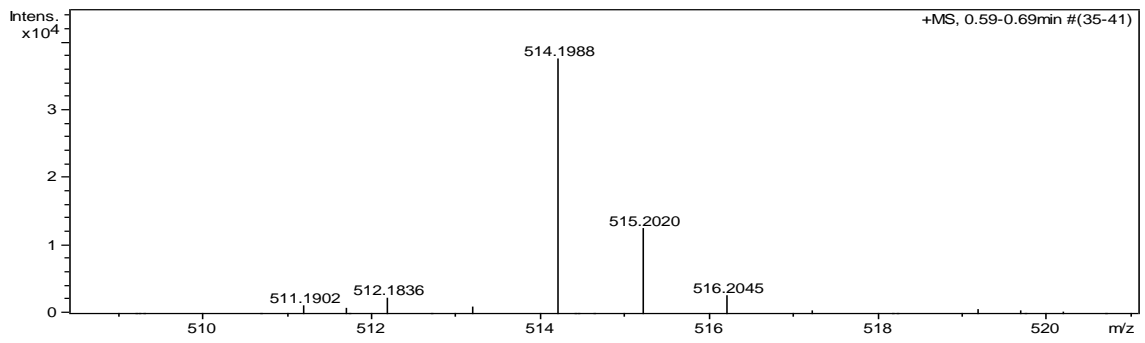

## Ethyl

### *rel*-(1*S*,2*R*,4*S*)-2',6'-dioxo-2,4-di-*p*-tolyl-1,2,4,9-tetrahydrospiro[carbazole-3,1'-cyclohexane]-1-carboxylate (2b):

White solid, 84%, m.p. 181-183 °C; <sup>1</sup>H NMR (400 MHz, CDCl<sub>3</sub>) δ: 8.43 (s, 1H, NH), 7.32 (d, *J* = 8.4 Hz, 1H, ArH), 7.13 (t, *J* = 9.6 Hz, 2H, ArH), 7.07 (d, *J* = 7.2 Hz, 1H, ArH), 7.04-7.01 (m, 4H, ArH), 6.96 (d, *J* = 8.4 Hz, 1H, ArH), 6.77 (d, *J* = 7.2 Hz, 1H, ArH), 6.73 (d, *J* = 9.6 Hz, 1H, ArH), 6.35 (d, *J* = 8.0 Hz, 1H, ArH), 5.14 (d, *J* = 2.4 Hz, 1H, CH), 5.04 (dd, *J*<sub>1</sub> = 2.4 Hz, *J*<sub>2</sub> = 11.6 Hz, 1H, CH), 4.17 (d, *J* = 11.2 Hz, 1H, CH), 4.07 (q, *J* = 7.2 Hz, 2H, CH<sub>2</sub>), 2.32 (s, 3H, CH<sub>3</sub>), 2.28 (s, 3H, CH<sub>3</sub>), 2.03-1.94 (m, 2H, CH<sub>2</sub>), 1.65-1.59 (m, 1H, CH), 1.52-1.45 (m, 1H, CH), 1.11 (t, *J* = 7.2 Hz, 3H, CH<sub>3</sub>), 0.78-0.71 (m, 2H, CH<sub>2</sub>); <sup>13</sup>C NMR (400 MHz, CDCl<sub>3</sub>) δ: 213.2, 211.5, 171.2, 137.2, 136.0, 135.1, 134.7, 130.5, 130.0, 129.9, 129.3, 128.9, 126.4, 121.3, 120.2, 118.8, 110.7, 109.4, 72.0, 61.4, 49.6, 49.2, 45.4, 42.9, 41.4, 21.1, 21.0, 14.7, 14.0; IR (KBr) ν: 3431, 3045, 2981, 1846, 1731, 1655, 1613, 1587, 1456, 1337, 1300, 1219, 1187, 845, 787 cm<sup>-1</sup>; MS (*m/z*): HRMS (ESI) Calcd. for C<sub>34</sub>H<sub>33</sub>NO<sub>4</sub>([M+H]<sup>+</sup>): 520.2468, found: 520.2462.

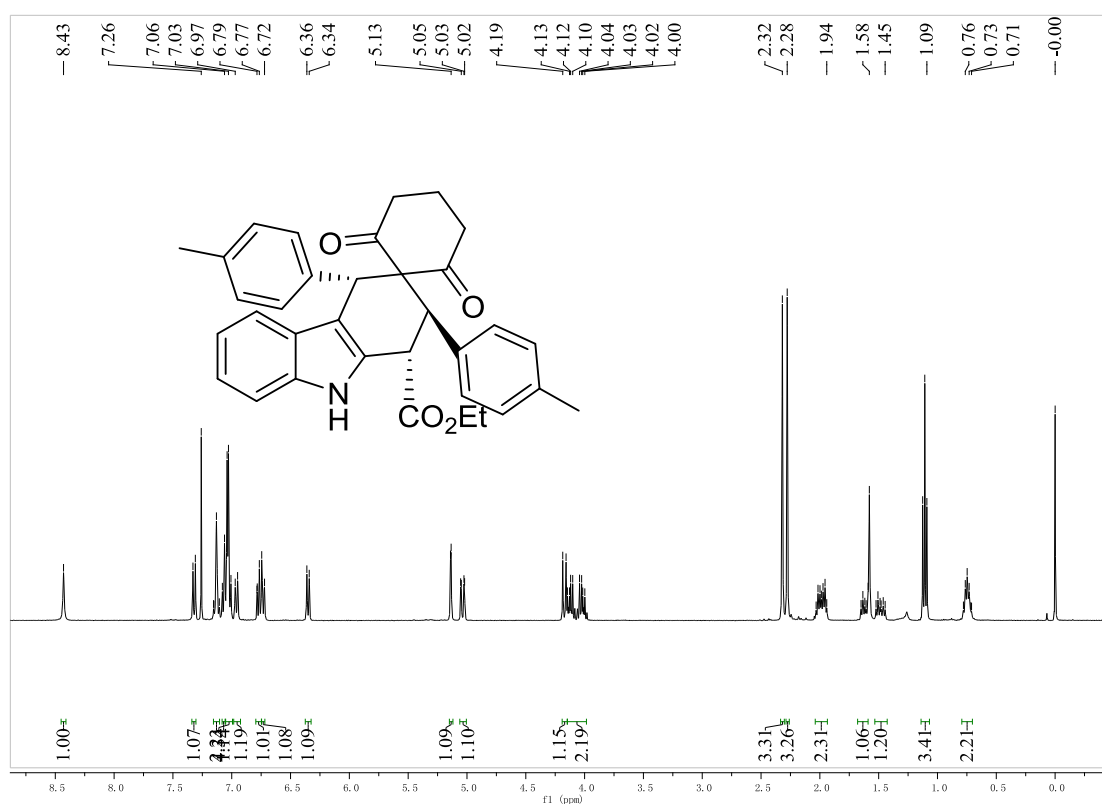

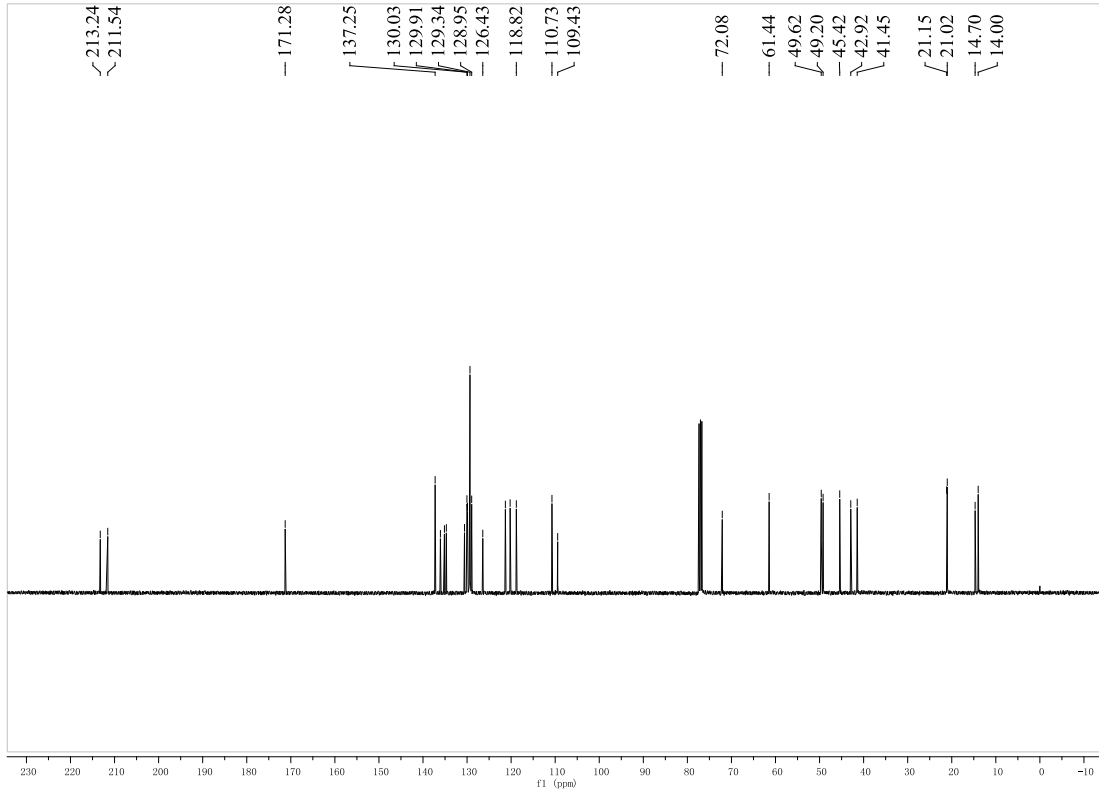

7-200-20210130102010 #39 RT: 0.38 AV: 1 NL: 3.74E+007  
 13C NMR (100.0000-1500.0000)  
 100009085000 100008800000

## Ethyl

### *rel*-(1*S*,2*R*,4*S*)-2,4-bis(4-methoxyphenyl)-2',6'-dioxo-1,2,4,9-tetrahydrospiro[carbazole-3,1'-cyclohexane]-1-carboxylate (2c):

white solid, 82%, m.p. 183-185 °C; <sup>1</sup>H NMR (400 MHz, CDCl<sub>3</sub>) δ: 8.42 (s, 1H, NH), 7.31 (d, *J* = 8.4 Hz, 1H, ArH), 7.18 (dd, *J*<sub>1</sub> = 8.4 Hz, *J*<sub>2</sub> = 2.0 Hz, 1H, ArH), 7.08-7.05 (m, 3H, ArH), 6.85 (dd, *J*<sub>1</sub> = 8.4 Hz, *J*<sub>2</sub> = 2.0 Hz, 1H, ArH), 6.80-6.76 (m, 4H, ArH), 6.70 (dd, *J*<sub>1</sub> = 8.4 Hz, *J*<sub>2</sub> = 2.0 Hz, 1H, ArH), 6.36 (d, *J* = 8.0 Hz, 1H, ArH), 5.13 (d, *J* = 2.0 Hz, 1H, CH), 5.01 (dd, *J*<sub>1</sub> = 11.2 Hz, *J*<sub>2</sub> = 2.0 Hz, 1H, CH), 4.16 (d, *J* = 11.2 Hz, 1H, CH), 4.08 (q, *J* = 7.2 Hz, 2H, CH<sub>2</sub>), 3.79 (s, 3H, OCH<sub>3</sub>), 3.76 (s, 3H, OCH<sub>3</sub>), 2.04-1.98 (m, 2H, CH<sub>2</sub>), 1.69-1.61 (m, 1H, CH), 1.55-1.49 (m, 1H, CH), 1.12 (t, *J* = 7.2 Hz, 3H, CH<sub>3</sub>), 0.83-0.80 (m, 2H, CH<sub>2</sub>); <sup>13</sup>C NMR (400 MHz, CDCl<sub>3</sub>) δ: 213.4, 211.7, 171.2, 158.9, 158.8, 136.0, 131.1, 130.5, 130.1, 129.7, 126.4, 121.3, 120.2, 118.8, 114.1, 113.9, 113.3, 110.7, 109.5, 72.1, 61.4, 55.1, 49.1, 48.8, 45.5, 42.8, 41.4, 14.8, 14.0; IR (KBr) ν: 3451, 3145, 2978, 1906, 1732, 1656, 1617, 1509, 1487, 1355, 1341, 1279, 1164, 884, 762 cm<sup>-1</sup>; MS (*m/z*): HRMS (ESI) Calcd. for C<sub>34</sub>H<sub>33</sub>NO<sub>6</sub>[M+H]<sup>+</sup>: 552.2361, found: 552.2358.

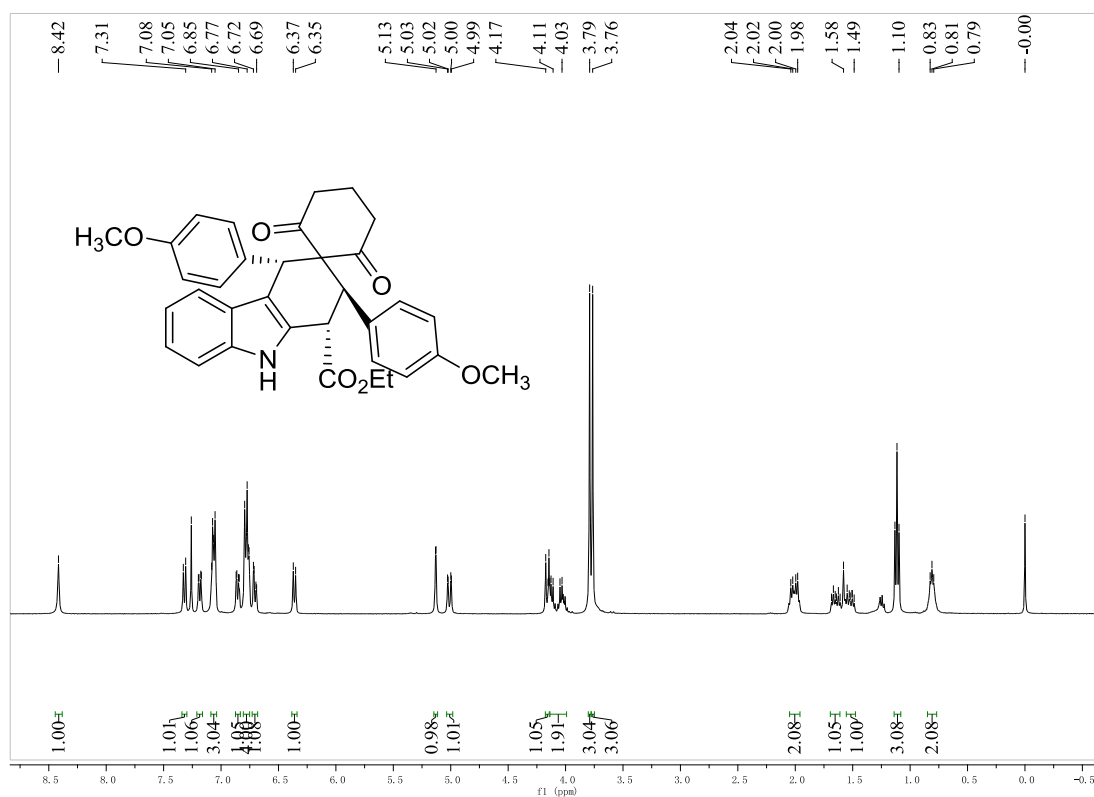



## Ethyl

### *rel*-(1*S*,2*R*,4*S*)-2,4-bis(4-chlorophenyl)-2',6'-dioxo-1,2,4,9-tetrahydrospiro[carbazole-3,1'-cyclohexane]-1-carboxylate (2d):

white solid, 80%, m.p. 190-192 °C;  $^1\text{H}$  NMR (400 MHz,  $\text{CDCl}_3$ )  $\delta$ : 8.48 (s, 1H, NH), 7.33 (d,  $J = 8.0$  Hz, 2H, ArH), 7.27-7.26 (m, 1H, ArH), 7.26-7.24 (m, 1H, ArH), 7.21 (dd,  $J_1 = 8.4$  Hz,  $J_2 = 2.0$  Hz, 1H, ArH), 7.15 (dd,  $J_1 = 8.4$  Hz,  $J_2 = 2.0$  Hz, 1H, ArH), 7.11-7.08 (m, 3H, ArH), 6.82-6.78 (m, 2H, ArH), 6.30 (d,  $J = 8.0$  Hz, 1H, ArH), 5.15 (d,  $J = 2.0$  Hz, 1H, CH), 5.00 (dd,  $J_1 = 11.2$  Hz,  $J_2 = 2.0$  Hz, 1H, CH), 4.19 (d,  $J = 11.2$  Hz, 1H, CH), 4.08 (q,  $J = 7.2$  Hz, 2H,  $\text{CH}_2$ ), 2.07-1.99 (m, 2H,  $\text{CH}_2$ ), 1.71-1.64 (m, 1H, CH), 1.54-1.48 (m, 1H, CH), 1.12 (t,  $J = 7.2$  Hz, 3H,  $\text{CH}_3$ ), 0.85-0.81 (m, 2H,  $\text{CH}_2$ );  $^{13}\text{C}$  NMR (400 MHz,  $\text{CDCl}_3$ )  $\delta$ : 212.7, 211.0, 170.7, 136.7, 136.3, 136.0, 133.7, 133.7, 131.4, 131.3, 130.3, 128.9, 128.9, 128.6, 126.0, 121.6, 119.9, 119.1, 110.9, 108.5, 71.7, 61.7, 49.3, 48.9, 45.1, 42.9, 41.4, 14.7, 14.0; IR (KBr)  $\nu$ : 3431, 3045, 2966, 1868, 1771, 1643, 1637, 1554, 1478, 1321, 1301, 1266, 1145, 882, 761  $\text{cm}^{-1}$ ; MS ( $m/z$ ): HRMS (ESI) Calcd. for  $\text{C}_{32}\text{H}_{27}\text{Cl}_2\text{NO}_4$  ( $[\text{M}+\text{Na}]^+$ ): 582.1209, found: 582.1208.

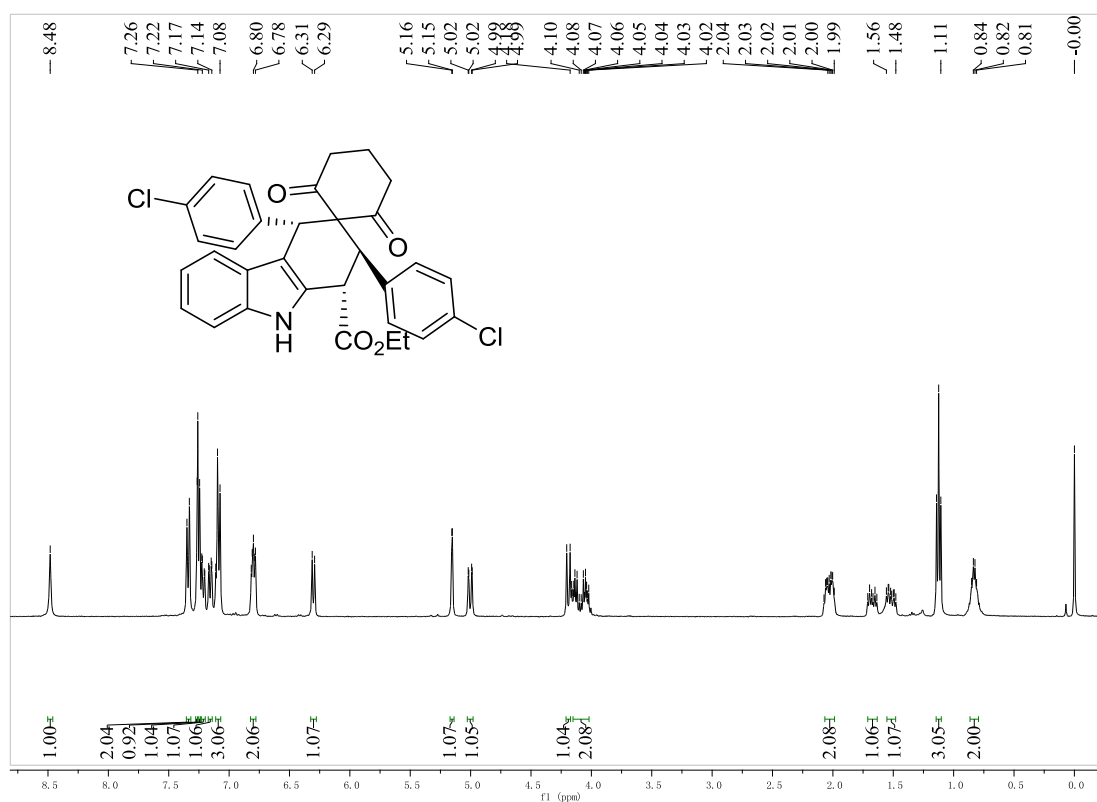

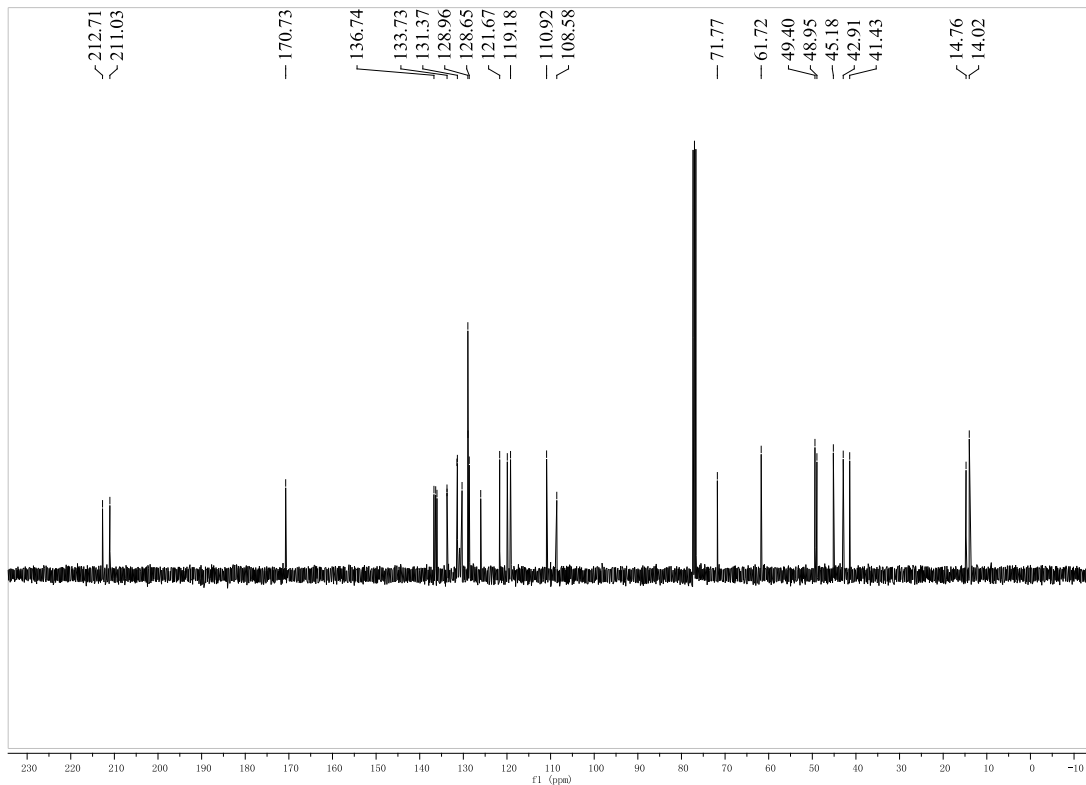

Z:\SCS\_20210130\103748#\8 RT: 0.10 AV: 1 NL: 1.19E+006  
 13C NMR (100.0000-1500.0000)  
 20210130 09:07:07  
 13C NMR (100.0000-1500.0000)

## Ethyl

### *rel*-(1*S*,2*S*,4*S*)-2,4-bis(2-chlorophenyl)-2',6'-dioxo-1,2,4,9-tetrahydrospiro[carbazole-3,1'-cyclohexane]-1-carboxylate (2e):

white solid, 74%, m.p. 198-200 °C; <sup>1</sup>H NMR (400 MHz, CDCl<sub>3</sub>) δ: 8.46 (s, 1H, NH), 7.45 (dd, *J*<sub>1</sub> = 8.0 Hz, *J*<sub>2</sub> = 0.8 Hz, 1H, ArH), 7.38 (dd, *J*<sub>1</sub> = 8.0 Hz, *J*<sub>2</sub> = 2.0 Hz, 1H, ArH), 7.32-7.29 (m, 2H, ArH), 7.23-7.16 (m, 3H, ArH), 7.09-7.02 (m, 2H, ArH), 6.86 (dd, *J*<sub>1</sub> = 8.0 Hz, *J*<sub>2</sub> = 2.0 Hz, 1H, ArH), 6.75 (t, *J* = 8.0 Hz, 1H, ArH), 6.15 (d, *J* = 8.0 Hz, 1H, ArH), 5.81 (d, *J* = 2.0 Hz, 1H, CH), 5.07 (dd, *J*<sub>1</sub> = 11.2 Hz, *J*<sub>2</sub> = 2.0 Hz, 1H, CH), 4.96 (d, *J* = 11.2 Hz, 1H, CH), 4.09 (q, *J* = 7.2 Hz, 2H, CH<sub>2</sub>), 2.24-2.14 (m, 2H, CH<sub>2</sub>), 1.77-1.68 (m, 2H, CH<sub>2</sub>), 1.10 (t, *J* = 7.2 Hz, 3H, CH<sub>3</sub>), 1.07-1.03 (m, 1H, CH), 1.01-0.96 (m, 1H, CH); <sup>13</sup>C NMR (400 MHz, CDCl<sub>3</sub>) δ: 212.5, 207.6, 171.1, 136.6, 136.0, 135.9, 135.8, 134.4, 133.2, 130.9, 130.8, 129.9, 128.9, 128.9, 128.8, 127.0, 126.8, 126.0, 121.6, 119.4, 119.1, 110.8, 109.6, 69.2, 61.7, 46.6, 45.4, 44.4, 43.5, 40.5, 15.1, 13.8; IR (KBr) ν: IR (KBr) ν: 3411, 3045, 2966, 1868, 1761, 1643, 1637, 1574, 1478, 1321, 1301, 1245, 1145, 890, 761 cm<sup>-1</sup>; MS (*m/z*): HRMS (ESI) Calcd. for C<sub>32</sub>H<sub>27</sub>Cl<sub>2</sub>NO<sub>4</sub>([M+Na]<sup>+</sup>): 582.1209, found: 582.1208.

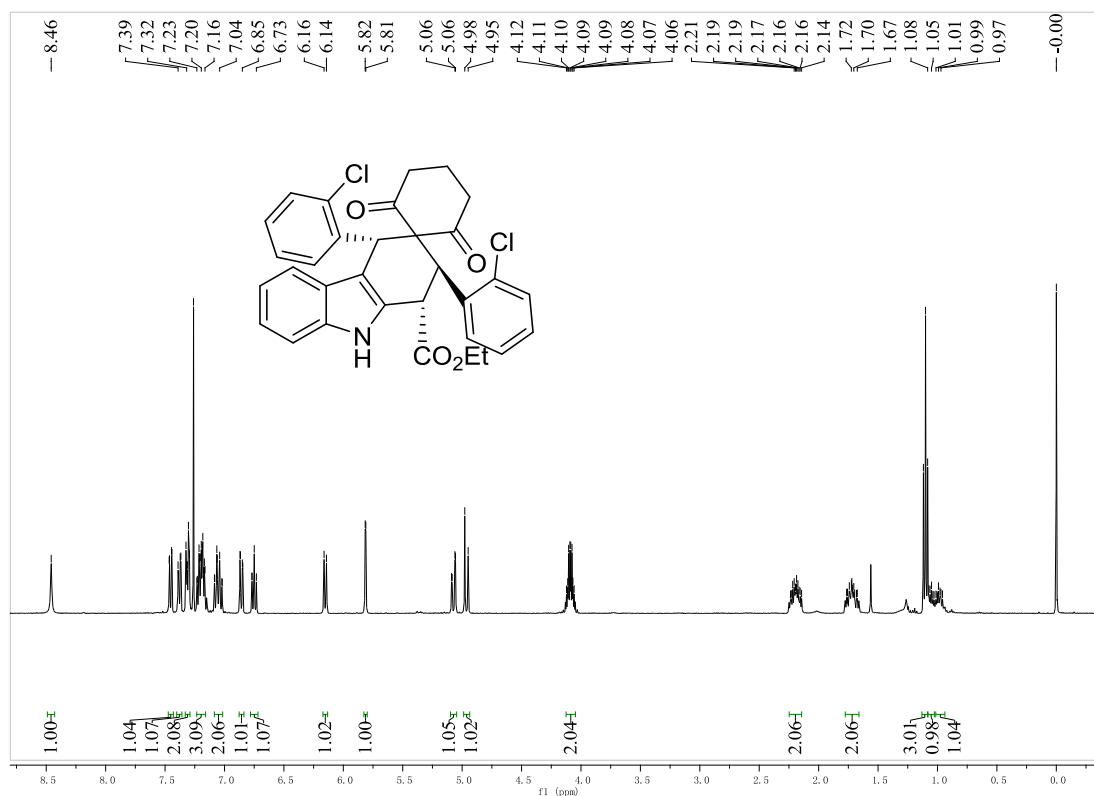





## Ethyl

### *rel*-(1*S*,2*R*,4*S*)-2,4-bis(3-chlorophenyl)-2',6'-dioxo-1,2,4,9-tetrahydrospiro[carbazole-3,1'-cyclohexane]-1-carboxylate (**2f**):

white solid, 66%, m.p. 196-198 °C; <sup>1</sup>H NMR (400 MHz, CDCl<sub>3</sub>) δ: 8.50 (s, 1H, NH), 7.35 (dd, *J*<sub>1</sub> = 8.0 Hz, *J*<sub>2</sub> = 3.2 Hz, 1H, ArH), 7.31-7.29 (m, 2H, ArH), 7.23-7.22 (m, 2H, ArH), 7.16-7.08 (m, 3H, ArH), 7.05-7.03 (m, 1H, ArH), 6.85-6.74 (m, 2H, ArH), 6.32 (dd, *J*<sub>1</sub> = 8.0 Hz, *J*<sub>2</sub> = 3.2 Hz, 1H, ArH), 5.14 (dd, *J*<sub>1</sub> = 17.6 Hz, *J*<sub>2</sub> = 2.0 Hz, 1H, CH), 5.01 (dd, *J*<sub>1</sub> = 11.2 Hz, *J*<sub>2</sub> = 2.0 Hz, 1H, CH), 4.17 (q, *J* = 7.2 Hz, 2H, CH<sub>2</sub>), 4.07-4.02 (m, 1H, CH), 2.11-2.01 (m, 2H, CH<sub>2</sub>), 1.71-1.61 (m, 1H, CH), 1.54-1.44 (m, 1H, CH), 1.12 (t, *J* = 7.2 Hz, 3H, CH<sub>3</sub>), 0.87-0.78 (m, 2H, CH<sub>2</sub>); <sup>13</sup>C NMR (400 MHz, CDCl<sub>3</sub>) δ: 212.3, 212.3, 210.8, 210.7, 170.6, 140.3, 139.9, 136.0, 134.6, 130.0, 129.9, 129.9, 128.3, 128.0, 128.0, 121.6, 119.9, 119.1, 110.9, 110.9, 108.4, 71.5, 61.7, 49.6, 49.3, 49.2, 45.1, 45.0, 42.8, 41.3, 14.7, 13.9; IR (KBr) ν: 3420, 3045, 2976, 1842, 1764, 1643, 1611, 1538, 1478, 1321, 1301, 1266, 1145, 882, 770 cm<sup>-1</sup>; MS (*m/z*): HRMS (ESI) Calcd. for C<sub>32</sub>H<sub>27</sub>Cl<sub>2</sub>NO<sub>4</sub>([M+Na]<sup>+</sup>): 582.1209, found: 582.1210.

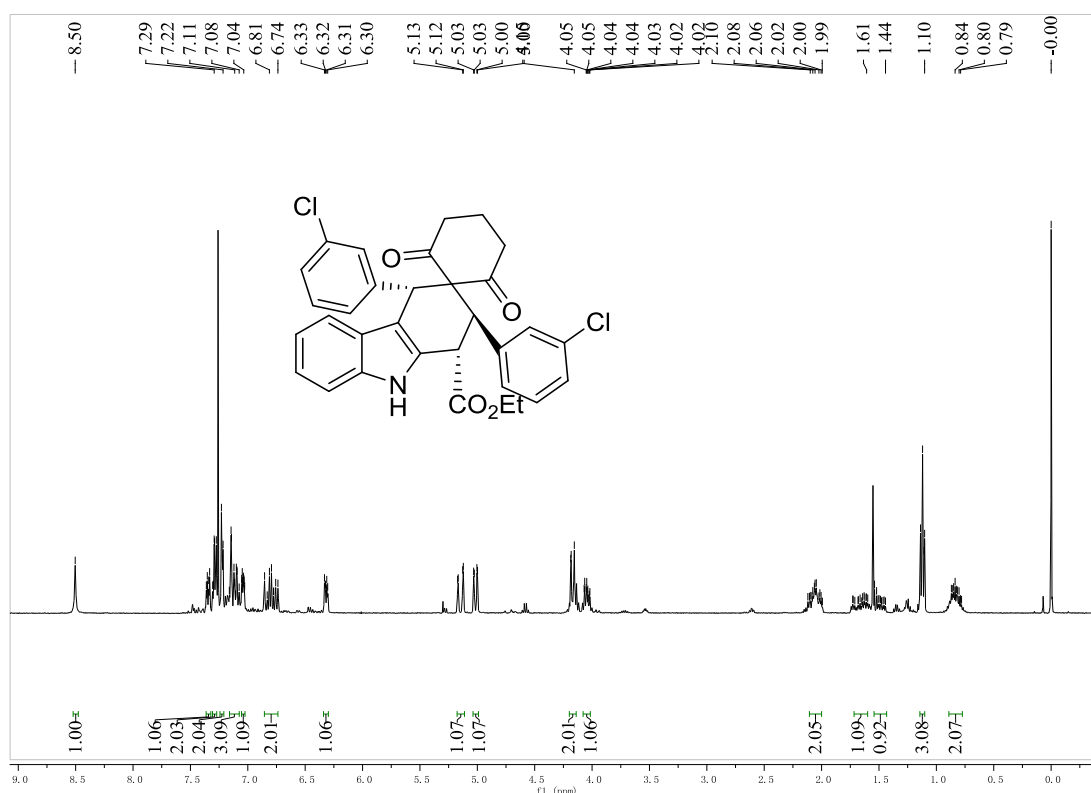



## Ethyl

### *rel*-(1*S*,2*R*,4*S*)-2,4-bis(4-nitrophenyl)-2',6'-dioxo-1,2,4,9-tetrahydrospiro[carbazole-3,1'-cyclohexane]-1-carboxylate (2g):

white solid, 76%, m.p. 203-205 °C; <sup>1</sup>H NMR (400 MHz, CDCl<sub>3</sub>) δ: 8.61 (s, 1H, NH), 8.26 (dd, *J*<sub>1</sub> = 8.4 Hz, *J*<sub>2</sub> = 2.4 Hz, 1H, ArH), 8.17 (d, *J* = 8.8 Hz, 2H, ArH), 8.05 (dd, *J*<sub>1</sub> = 8.8 Hz, *J*<sub>2</sub> = 2.4 Hz, 1H, ArH), 7.48 (dd, *J*<sub>1</sub> = 8.4 Hz, *J*<sub>2</sub> = 2.0 Hz, 1H, ArH), 7.39-7.35 (m, 3H, ArH), 7.13 (t, *J* = 7.2 Hz, 1H, ArH), 7.05 (dd, *J*<sub>1</sub> = 8.8 Hz, *J*<sub>2</sub> = 2.0 Hz, 1H, ArH), 6.80 (t, *J* = 7.2 Hz, 1H, ArH), 6.18 (d, *J* = 8.0 Hz, 1H, ArH), 5.32 (d, *J* = 2.0 Hz, 1H, CH), 5.09 (dd, *J*<sub>1</sub> = 11.6 Hz, *J*<sub>2</sub> = 2.4 Hz, 1H, CH), 4.37 (d, *J* = 11.6 Hz, 1H, CH), 4.12 (q, *J* = 7.2 Hz, 2H, CH<sub>2</sub>), 2.09-2.02 (m, 2H, CH<sub>2</sub>), 1.71-1.63 (m, 1H, CH), 1.52-1.44 (m, 1H, CH), 1.14 (t, *J* = 7.2 Hz, 3H, CH<sub>3</sub>), 0.83-0.77 (m, 2H, CH<sub>2</sub>); <sup>13</sup>C NMR (400 MHz, CDCl<sub>3</sub>) δ: 211.8, 210.1, 170.0, 147.5, 147.4, 145.6, 145.3, 136.0, 131.1, 130.9, 129.9, 125.5, 123.9, 123.8, 123.7, 122.1, 119.5, 119.4, 111.2, 107.5, 71.4, 62.1, 49.8, 49.3, 44.8, 42.8, 41.3, 14.7, 14.0; IR (KBr) ν: 3471, 3000, 2941, 1932, 1816, 1690, 1631, 1507, 1471, 1345, 1300, 1241, 1131, 932, 817 cm<sup>-1</sup>; MS (*m/z*): HRMS (ESI) Calcd. for C<sub>32</sub>H<sub>27</sub>N<sub>3</sub>O<sub>8</sub>([M+Na]<sup>+</sup>): 604.1690, found: 604.1684.

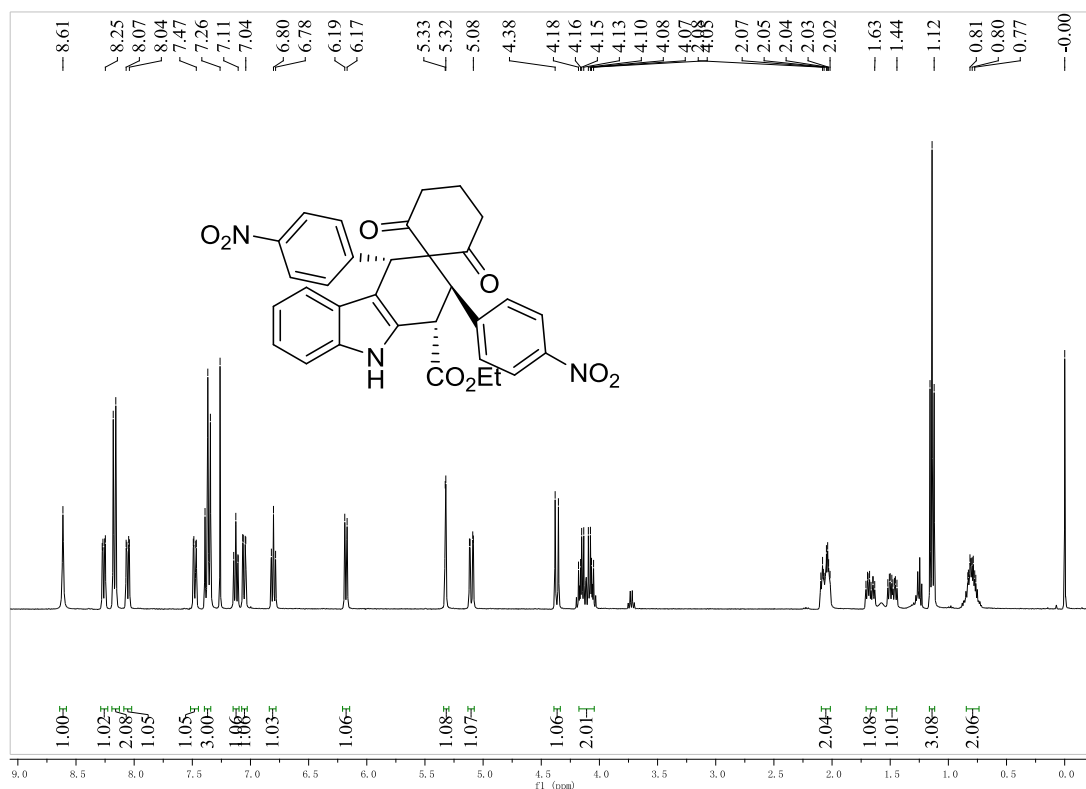



## Ethyl

### *rel*-(1*S*,2*R*,4*S*)-2,4-bis(3-nitrophenyl)-2',6'-dioxo-1,2,4,9-tetrahydrospiro[carbazole-3,1'-cyclohexane]-1-carboxylate (2h):

white solid, 62%, m.p. 213-215 °C; <sup>1</sup>H NMR (400 MHz, CDCl<sub>3</sub>) δ: 8.45 (s, 1H, NH), 8.22-8.21 (m, 1H, ArH), 8.17-8.15 (m, 2H, ArH), 8.04 (dd, *J*<sub>1</sub> = 8.0 Hz, *J*<sub>2</sub> = 1.2 Hz, 1H, ArH), 7.67 (d, *J* = 7.6 Hz, 1H, ArH), 7.61 (d, *J* = 7.6 Hz, 1H, ArH), 7.50 (t, *J* = 8.0 Hz, 1H, ArH), 7.38 (t, *J* = 8.0 Hz, 2H, ArH), 7.17 (t, *J* = 8.0 Hz, 1H, ArH), 7.05 (d, *J* = 7.6 Hz, 1H, ArH), 6.98 (t, *J* = 7.6 Hz, 1H, ArH), 5.09 (d, *J* = 10.4 Hz, 1H, CH), 4.92 (s, 1H, CH), 4.63 (d, *J* = 10.4 Hz, 1H, CH), 4.25 (q, *J* = 7.2 Hz, 2H, CH<sub>2</sub>), 3.12-3.04 (m, 1H, CH), 2.69-2.59 (m, 2H, CH<sub>2</sub>), 2.34-2.20 (m, 2H, CH<sub>2</sub>), 1.68-1.61 (m, 1H, CH), 1.27 (t, *J* = 7.2 Hz, 3H, CH<sub>3</sub>); <sup>13</sup>C NMR (400 MHz, CDCl<sub>3</sub>) δ: 211.6, 210.3, 170.1, 148.3, 140.4, 136.4, 130.1, 129.9, 129.7, 129.7, 125.6, 124.7, 124.4, 123.2, 123.1, 123.0, 122.0, 119.6, 119.5, 119.4, 119.0, 111.3, 111.2, 107.6, 71.4, 62.0, 49.7, 49.7, 49.2, 45.0, 42.7, 41.1, 14.8, 14.0; IR (KBr) ν: 3459, 3010, 2941, 1932, 1816, 1690, 1653, 1507, 1462, 1345, 1331, 1248, 1131, 932, 817 cm<sup>-1</sup>; MS (*m/z*): HRMS (ESI) Calcd. for C<sub>32</sub>H<sub>27</sub>N<sub>3</sub>O<sub>8</sub>([M+Na]<sup>+</sup>): 604.1690, found: 604.1688.

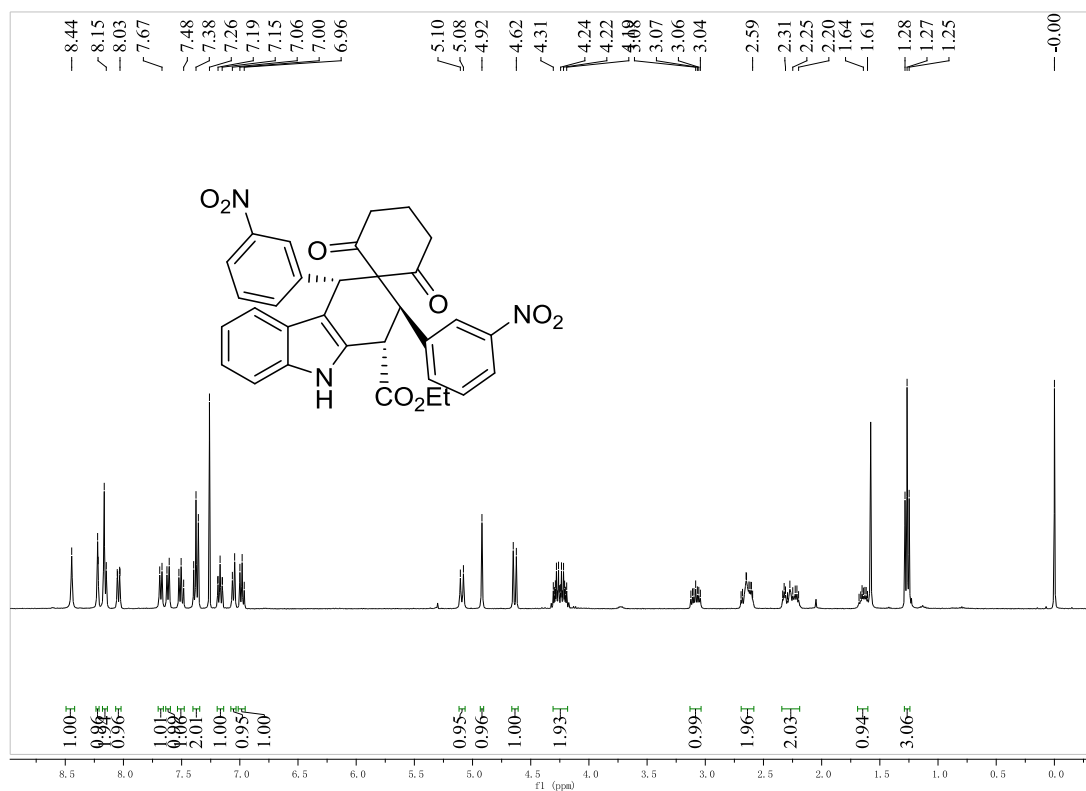



## Ethyl

### *rel*-(1*S*,2*R*,4*S*)-2,4-bis(4-fluorophenyl)-2',6'-dioxo-1,2,4,9-tetrahydrospiro[carbazole-3,1'-cyclohexane]-1-carboxylate (**2i**):

white solid, 70%, m.p. 184-186 °C; <sup>1</sup>H NMR (400 MHz, CDCl<sub>3</sub>) δ: 8.47 (s, 1H, NH), 7.33 (d, *J* = 8.4 Hz, 1H, ArH), 7.26-7.23 (m, 1H, ArH), 7.15-7.11 (m, 2H, ArH), 7.09-7.05 (m, 2H, ArH), 6.97 (t, *J* = 8.2 Hz, 2H, ArH), 6.89-6.83 (m, 2H, ArH), 6.79 (t, *J* = 8.0 Hz, 1H, ArH), 6.29 (d, *J* = 8.0 Hz, 1H, ArH), 5.17 (d, *J* = 2.0 Hz, 1H, CH), 5.01 (dd, *J*<sub>1</sub> = 11.2 Hz, *J*<sub>2</sub> = 2.0 Hz, 1H, CH), 4.20 (d, *J* = 11.2 Hz, 1H, CH), 4.09 (q, *J* = 7.2 Hz, 2H, CH<sub>2</sub>), 2.05-1.99 (m, 2H, CH<sub>2</sub>), 1.69-1.61 (m, 1H, CH), 1.54-1.48 (m, 1H, CH), 1.11 (t, *J* = 7.2 Hz, 3H, CH<sub>3</sub>), 0.84-0.80 (m, 2H, CH<sub>2</sub>); <sup>13</sup>C NMR (400 MHz, CDCl<sub>3</sub>) δ: 212.9, 211.3, 170.8, 163.4, 161.0, 160.8, 136.0, 133.9, 131.7, 131.7, 131.5, 131.5, 130.3, 126.1, 121.5, 119.9, 119.0, 115.8, 115.5, 110.9, 108.9, 71.9, 61.6, 49.2, 48.8, 45.4, 42.8, 41.4, 14.7, 14.0; IR (KBr) ν: 3441, 3082, 2973, 1845, 1761, 1688, 1648, 1565, 1483, 1343, 1382, 1266, 1141, 863, 745 cm<sup>-1</sup>; MS (*m/z*): HRMS (ESI) Calcd. for C<sub>32</sub>H<sub>28</sub>F<sub>2</sub>NO<sub>4</sub>([M+H]<sup>+</sup>): 528.1981, found: 528.1973.

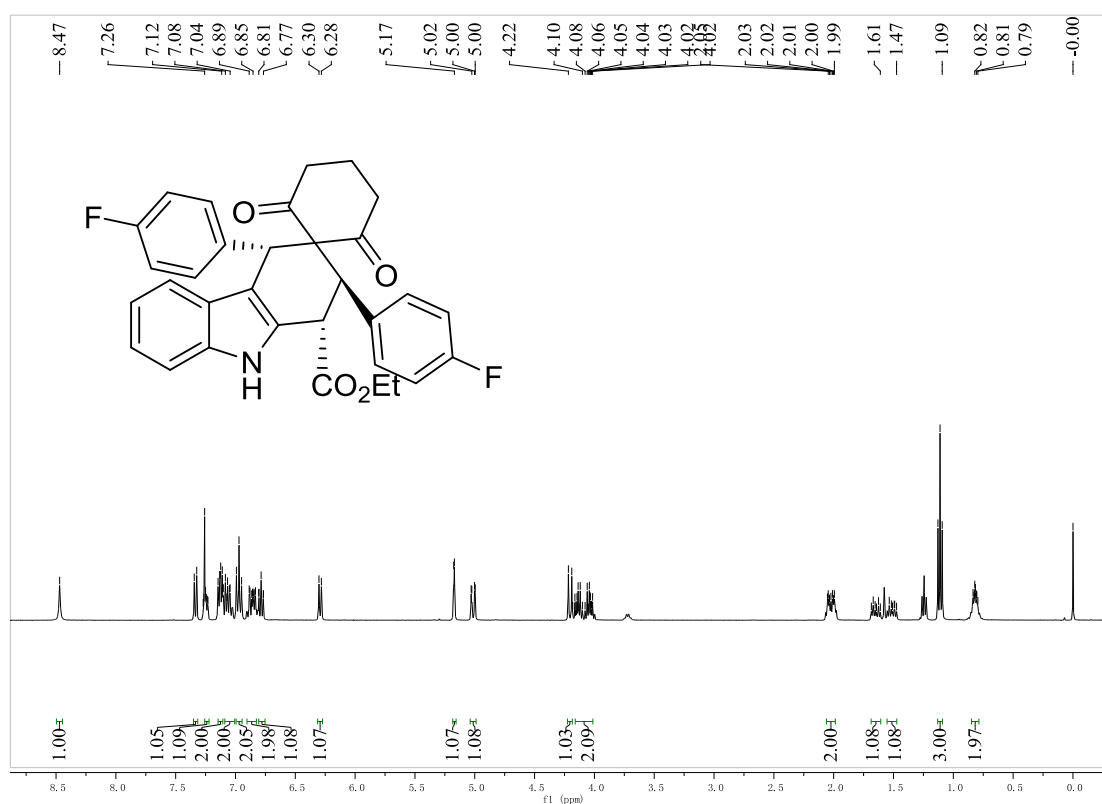



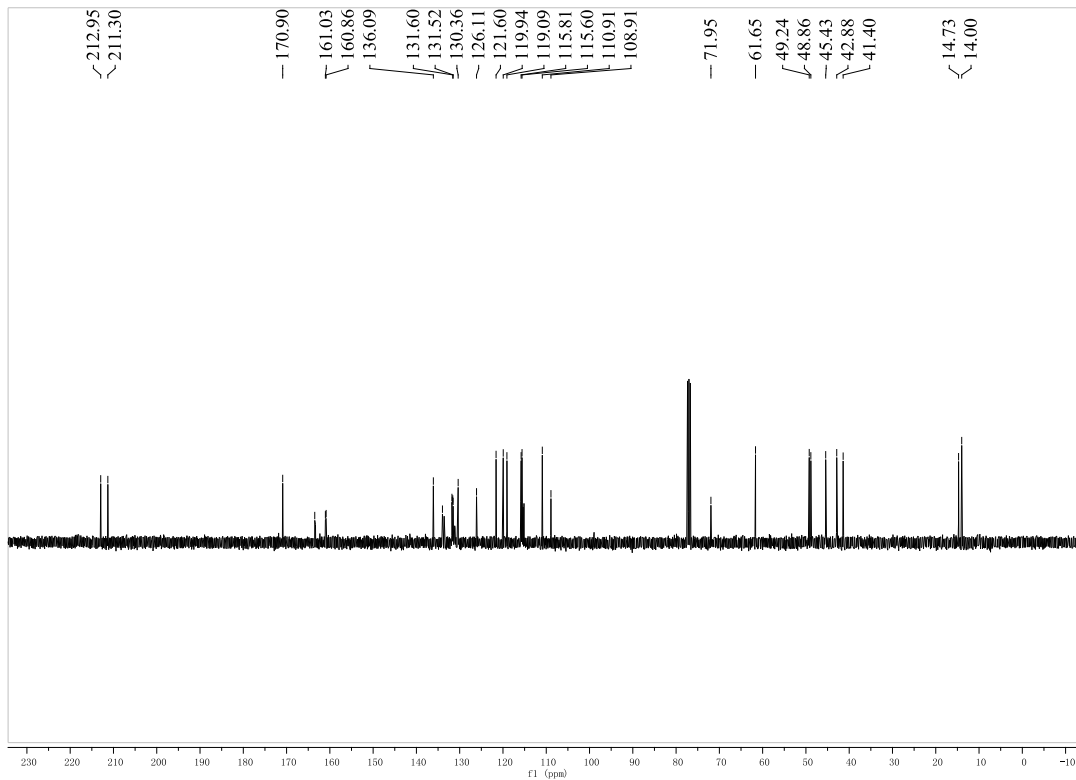

C:\MSDC1\#14 PT-013 AV:1 NI:4.51E+007  
 01\_0894  
 13C NMR (100.0000) Full.ms [100.0000-1500.0000]  
 162.1620 0.0000  
 170.9000 0.0000  
 211.3000 0.0000  
 212.9500 0.0000

## Ethyl

### *rel*-(1*S*,2*R*,4*S*)-4',4'-dimethyl-2',6'-dioxo-2,4-diphenyl-1,2,4,9-tetrahydrospiro[carbazole-3,1'-cyclohexane]-1-carboxylate (2j):

white solid, 63%, m.p. 178-181 °C; <sup>1</sup>H NMR (400 MHz, CDCl<sub>3</sub>) δ: 8.40 (s, 1H, NH), 7.39-7.31 (m, 4H, ArH), 7.27-7.20 (m, 6H, ArH), 7.08-6.93 (m, 2H, ArH), 6.75-6.72 (m, 1H, ArH), 6.15-6.13 (m, 1H, ArH), 5.24 (dd, *J*<sub>1</sub> = 10.8 Hz, *J*<sub>2</sub> = 2.4 Hz, 1H, CH), 5.04 (d, *J* = 2.4 Hz, 1H, CH), 4.37 (d, *J* = 10.8 Hz, 1H, CH), 4.06 (q, *J* = 7.2 Hz, 2H, CH<sub>2</sub>), 2.05 (dd, *J*<sub>1</sub> = 17.2 Hz, *J*<sub>2</sub> = 1.6 Hz, 1H, CH), 1.88 (d, *J* = 17.2 Hz, 1H, CH), 1.74 (dd, *J*<sub>1</sub> = 16.4 Hz, *J*<sub>2</sub> = 1.6 Hz, 1H, CH), 1.52 (d, *J* = 16.4 Hz, 1H, CH), 1.06 (t, *J* = 7.2 Hz, 3H, CH<sub>3</sub>), 0.28 (s, 3H, CH<sub>3</sub>), 0.01 (s, 3H, CH<sub>3</sub>); <sup>13</sup>C NMR (400 MHz, CDCl<sub>3</sub>) δ: 212.1, 211.3, 171.2, 138.7, 138.6, 136.1, 131.1, 130.7, 130.4, 128.5, 128.5, 128.3, 128.0, 127.6, 126.4, 121.4, 120.1, 118.9, 110.7, 109.1, 71.4, 61.4, 56.1, 54.8, 51.8, 48.6, 45.6, 30.2, 28.7, 28.1, 13.9; IR (KBr) ν: 3354, 3167, 3079, 2945, 1766, 1637, 1645, 1587, 1464, 1371, 1378, 1256, 1183, 967, 888 cm<sup>-1</sup>; MS (*m/z*): HRMS (ESI) Calcd. for C<sub>34</sub>H<sub>33</sub>NO<sub>4</sub>([M+Na]<sup>+</sup>): 542.2302, found: 542.2297.

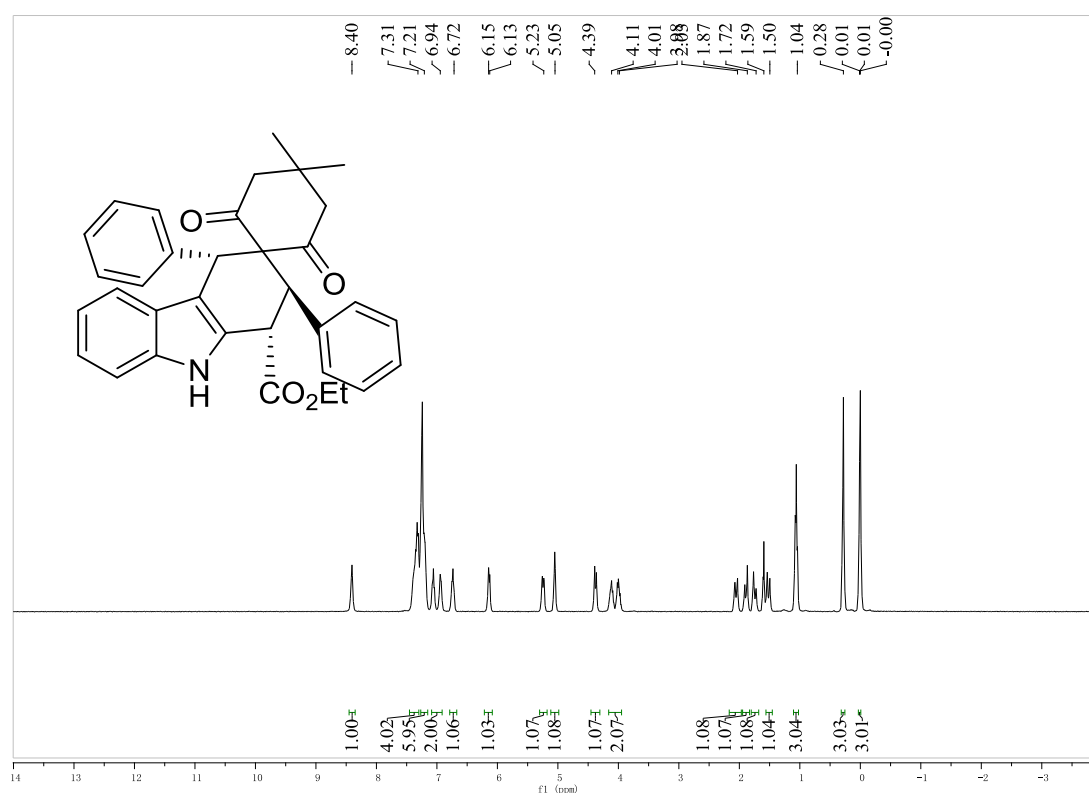

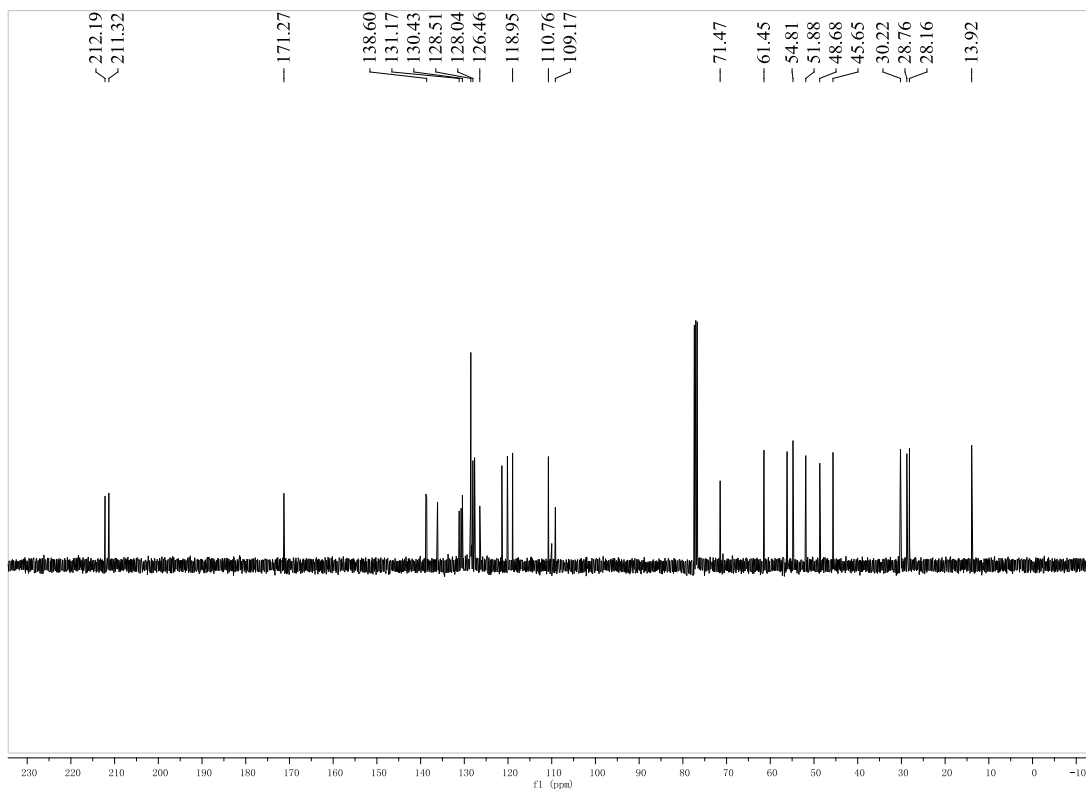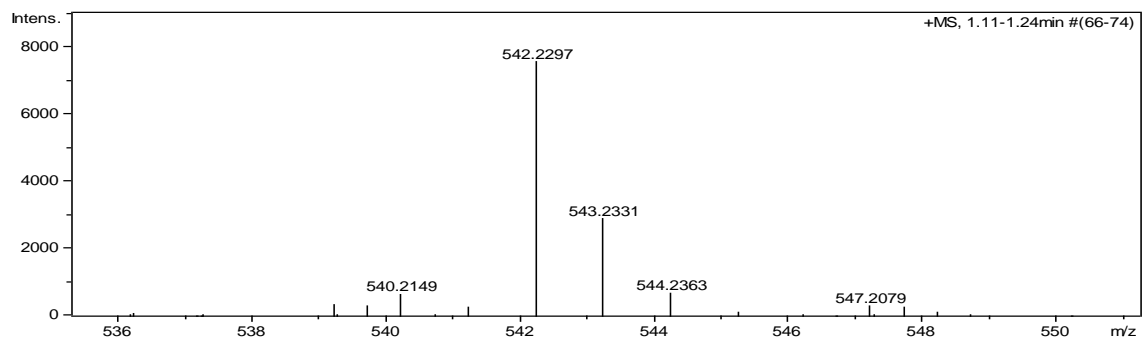

## Ethyl

### *rel*-(1*S*,2*R*,4*S*)-4',4'-dimethyl-2',6'-dioxo-2,4-di-*p*-tolyl-1,2,4,9-tetrahydrospiro[carbazole-3,1'-cyclohexane]-1-carboxylate (**2k**):

white solid, 63%, m.p. 178-181 °C; <sup>1</sup>H NMR (400 MHz, CDCl<sub>3</sub>) δ: 8.33 (s, 1H, NH), 7.29-7.27 (m, 1H, ArH), 7.18-7.17 (m, 2H, ArH), 7.08-7.06 (m, 2H, ArH), 7.03-6.97 (m, 4H, ArH), 6.79-6.72 (m, 2H, ArH), 6.15 (d, *J* = 7.6 Hz, 1H, ArH), 5.17 (d, *J* = 11.2 Hz, 1H, CH), 4.97 (s, 1H, CH), 4.30 (d, *J* = 11.2 Hz, 1H, CH), 4.09 (q, *J* = 6.4 Hz, 2H, CH<sub>2</sub>), 2.33 (s, 3H, CH<sub>3</sub>), 2.25 (s, 3H, CH<sub>3</sub>), 2.02 (d, *J* = 16.8 Hz, 1H, CH), 1.87 (d, *J* = 16.8 Hz, 1H, CH), 1.73 (d, *J* = 16.8 Hz, 1H, CH), 1.52 (d, *J* = 16.8 Hz, 1H, CH), 1.06 (t, *J* = 6.4 Hz, 3H, CH<sub>3</sub>), 0.28 (s, 3H, CH<sub>3</sub>), 0.10 (s, 3H, CH<sub>3</sub>); <sup>13</sup>C NMR (400 MHz, CDCl<sub>3</sub>) δ: 212.3, 211.5, 171.3, 137.6, 137.1, 136.0, 135.7, 135.4, 131.0, 130.4, 130.4, 129.2, 129.0, 128.8, 126.5, 121.3, 120.2, 118.8, 110.6, 109.9, 109.3, 71.5, 61.3, 56.1, 54.8, 51.4, 48.2, 45.7, 30.2, 28.7, 28.1, 21.1, 20.9, 13.9; IR (KBr) ν: 3400, 3173, 3054, 2985, 1787, 1643, 1611, 1545, 1437, 1380, 1356, 1244, 1167, 932, 840 cm<sup>-1</sup>; MS (*m/z*): HRMS (ESI) Calcd. for C<sub>36</sub>H<sub>37</sub>NO<sub>4</sub>([M+Na]<sup>+</sup>): 570.2615, found: 570.2607.

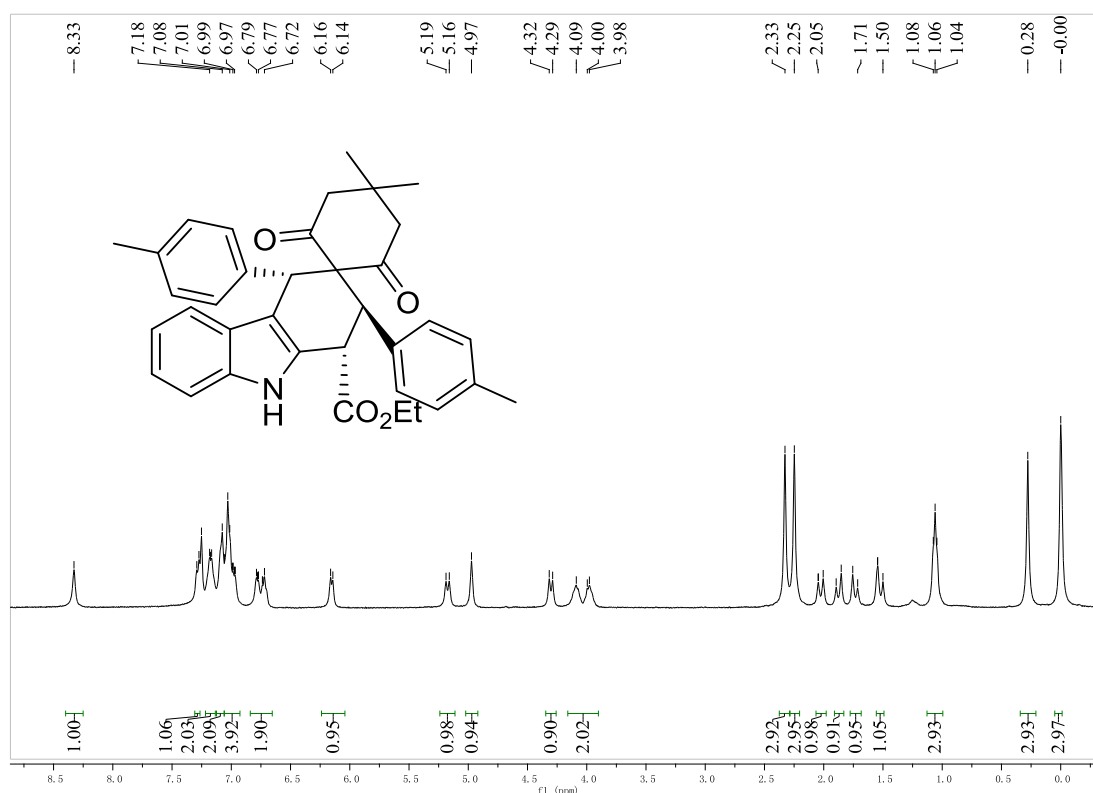

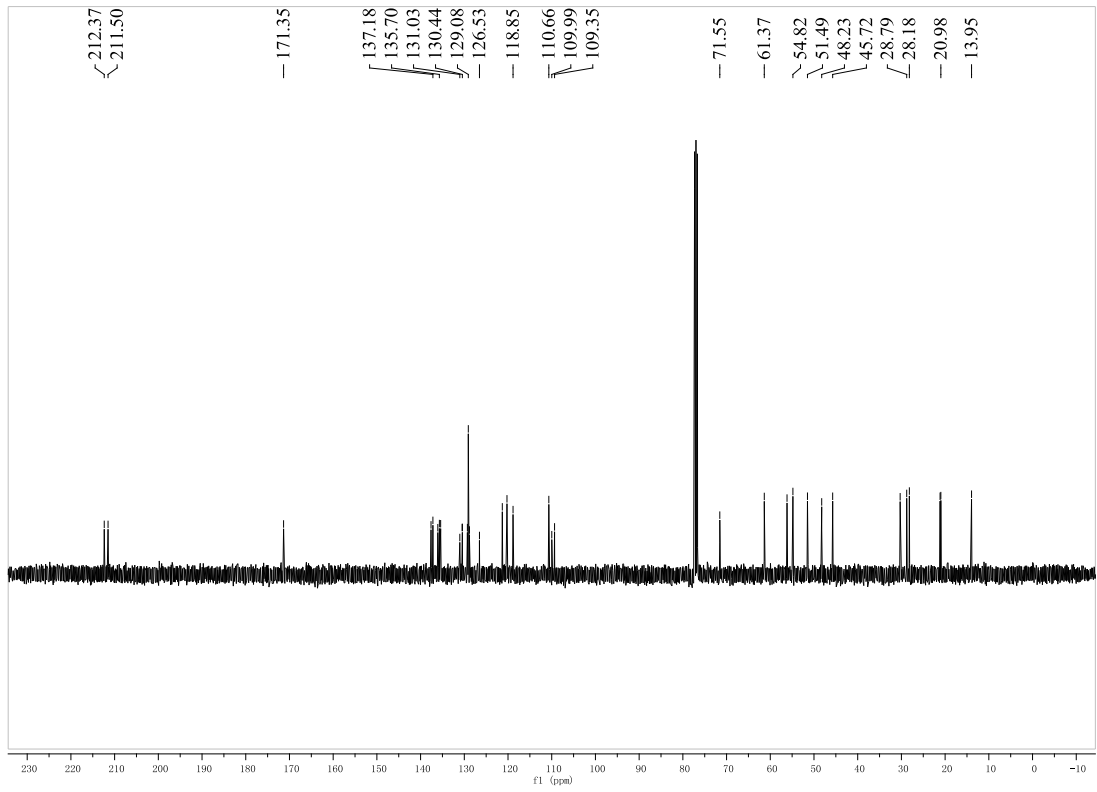

JCC11\_20210130104636 #21 RT: 0.26 AV: 1 NL: 1.12E+006  
 1230.5694658 [11171588.000-1500.0000]  
 1780006051602079205500660004990P

## Ethyl

### *rel*-(1*S*,2*R*,4*S*)-4',4'-dimethyl-2',6'-dioxo-2,4-di-*o*-tolyl-1,2,4,9-tetrahydrospiro[carbazole-3,1'-cyclohexane]-1-carboxylate (2l):

white solid, 53%, m.p. 181-183 °C; <sup>1</sup>H NMR (400 MHz, CDCl<sub>3</sub>) δ: 8.26 (s, 1H, NH), 7.28-7.26 (m, 1H, ArH), 7.23-7.21 (m, 2H, ArH), 7.15 (t, *J* = 7.6 Hz, 1H, ArH), 7.10-7.08 (m, 3H, ArH), 7.02 (t, *J* = 7.6 Hz, 1H, ArH), 6.97 (t, *J* = 8.0 Hz, 1H, ArH), 6.85 (d, *J* = 8.0 Hz, 1H, ArH), 6.69 (t, *J* = 8.0 Hz, 1H, ArH), 5.94 (d, *J* = 8.0 Hz, 1H, ArH), 5.45 (d, *J* = 2.0 Hz, 1H, CH), 5.11 (dd, *J*<sub>1</sub> = 11.2 Hz, *J*<sub>2</sub> = 2.0 Hz, 1H, CH), 4.57 (d, *J* = 11.2 Hz, 1H, CH), 4.08 (q, *J* = 7.2 Hz, 2H, CH<sub>2</sub>), 2.48 (s, 3H, CH<sub>3</sub>), 2.45 (s, 3H, CH<sub>3</sub>), 2.25 (d, *J* = 18.4 Hz, 1H, CH), 1.95 (d, *J* = 18.4 Hz, 1H, CH), 1.78 (d, *J* = 15.4 Hz, 1H, CH), 1.46 (d, *J* = 15.2 Hz, 1H, CH), 1.09 (t, *J* = 7.2 Hz, 3H, CH<sub>3</sub>), 0.27 (s, 3H, CH<sub>3</sub>), 0.20 (s, 3H, CH<sub>3</sub>); <sup>13</sup>C NMR (400 MHz, CDCl<sub>3</sub>) δ: 213.5, 211.0, 171.5, 138.6, 137.4, 137.4, 137.4, 135.9, 131.4, 130.7, 130.5, 128.0, 127.6, 126.1, 121.3, 119.5, 119.0, 110.7, 110.6, 69.5, 61.4, 56.4, 54.3, 47.4, 45.8, 44.6, 29.5, 29.0, 28.6, 20.0, 19.7, 13.9; IR (KBr) ν: 3413, 3155, 3081, 2961, 1766, 1651, 1630, 1543, 1466, 1358, 1318, 1260, 1141, 962, 860 cm<sup>-1</sup>; MS (*m/z*): HRMS (ESI) Calcd. for C<sub>36</sub>H<sub>37</sub>NO<sub>4</sub>([M+Na]<sup>+</sup>): 570.2615, found: 570.2607.

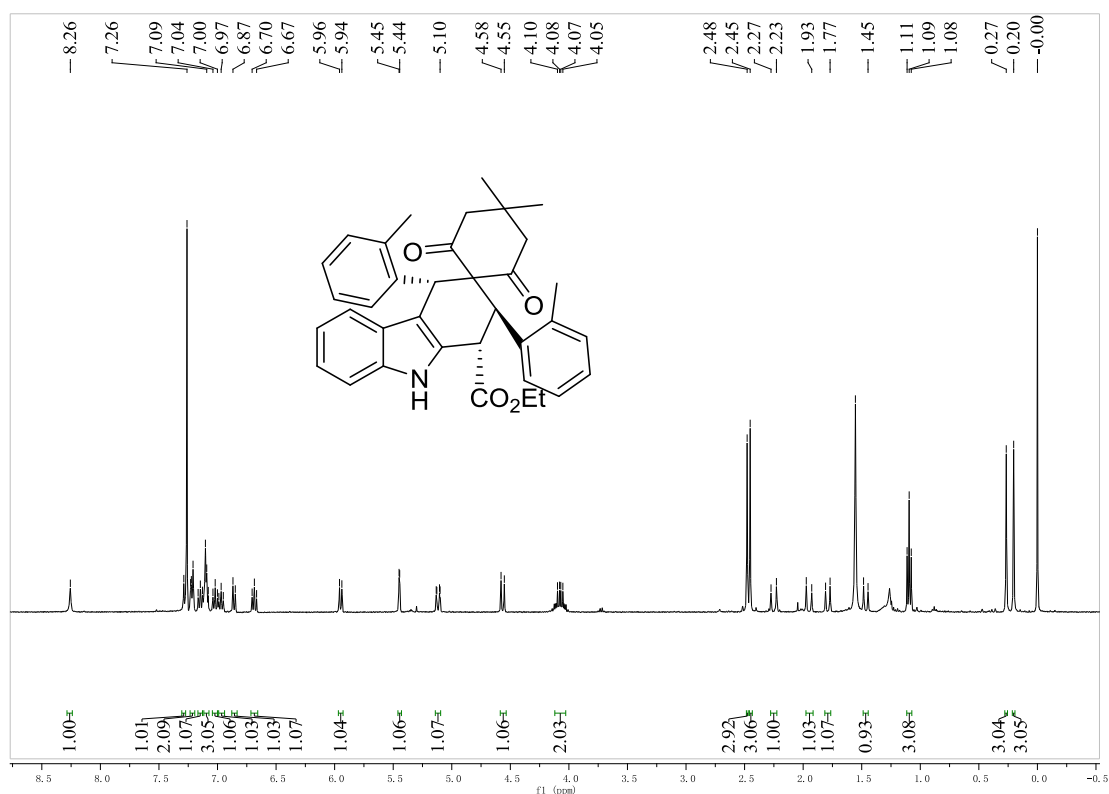

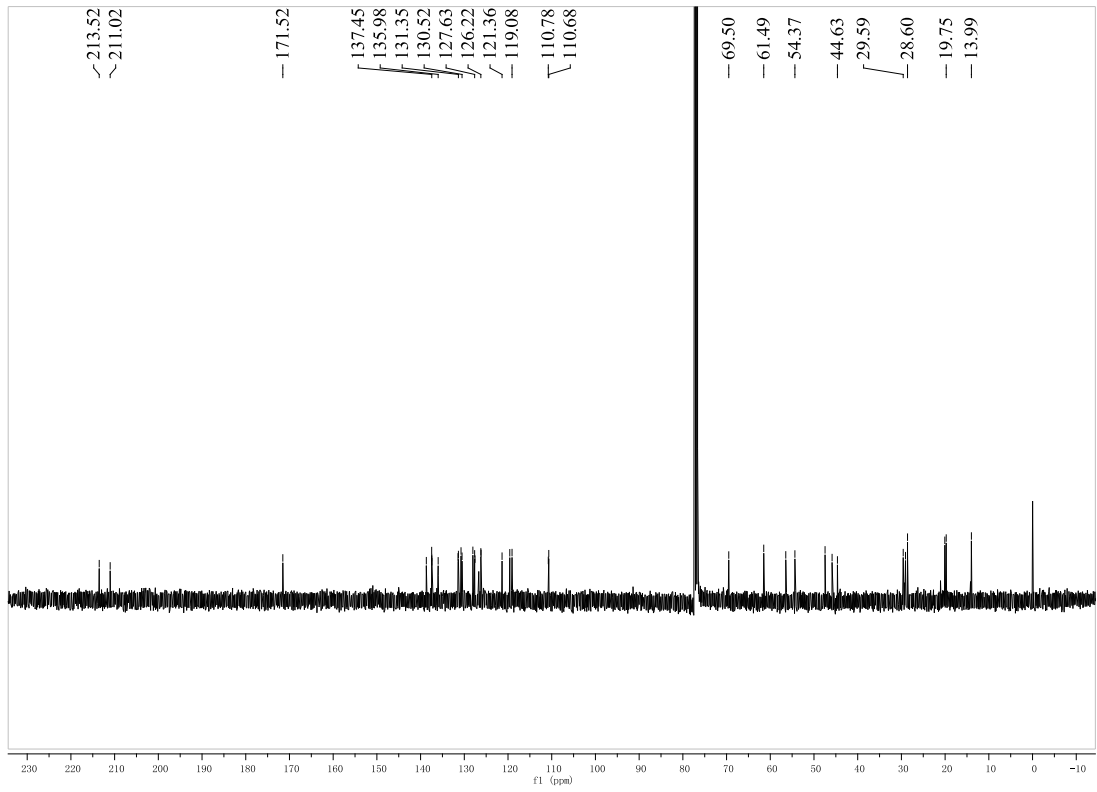

Z:\GC11\_20210130\104636 #28 RT: 0.35 AV: 1 NL: 8.07E+005  
 13C NMR (101 MHz, CDCl<sub>3</sub>) [F1 (175.61000-1500.0000)]  
 13C NMR (101 MHz, CDCl<sub>3</sub>) [F1 (175.61000-1500.0000)]

## Ethyl

### *rel*-(1*S*,2*R*,4*S*)-4',4'-dimethyl-2',6'-dioxo-2,4-di-*o*-tolyl-1,2,4,9-tetrahydrospiro[carbazole-3,1'-cyclohexane]-1-carboxylate (2m):

white solid, 61%, m.p. 177-179 °C; <sup>1</sup>H NMR (400 MHz, CDCl<sub>3</sub>) δ: 8.34 (s, 1H, NH), 7.29 (d, *J* = 8.4 Hz, 1H, ArH), 7.26-7.24 (m, 1H, ArH), 7.13 (d, *J* = 8.4 Hz, 2H, ArH), 7.05 (t, *J* = 8.0 Hz, 1H, ArH), 6.89 (dd, *J*<sub>1</sub> = 8.4 Hz, *J*<sub>2</sub> = 2.4 Hz, 1H, ArH), 6.82 (dd, *J*<sub>1</sub> = 8.4 Hz, *J*<sub>2</sub> = 1.6 Hz, 1H, ArH), 6.78-6.72 (m, 4H, ArH), 6.16 (t, *J* = 7.6 Hz, 1H, ArH), 5.15 (dd, *J*<sub>1</sub> = 11.2 Hz, *J*<sub>2</sub> = 2.0 Hz, 1H, CH), 4.96 (d, *J* = 2.0 Hz, 1H, CH), 4.30 (d, *J* = 11.2 Hz, 1H, CH), 4.04 (q, *J* = 7.2 Hz, 2H, CH<sub>2</sub>), 3.80 (s, 3H, OCH<sub>3</sub>), 3.75 (s, 3H, OCH<sub>3</sub>), 2.06 (dd, *J*<sub>1</sub> = 17.2 Hz, *J*<sub>2</sub> = 1.2 Hz, 1H, CH), 1.91 (d, *J* = 16.4 Hz, 1H, CH), 1.19 (dd, *J*<sub>1</sub> = 16.4 Hz, *J*<sub>2</sub> = 1.2 Hz, 1H, CH), 1.59-1.58 (m, 1H, CH), 1.08 (t, *J* = 7.2 Hz, 3H, CH<sub>3</sub>), 0.34 (s, 3H, CH<sub>3</sub>), 0.06 (s, 3H, CH<sub>3</sub>); <sup>13</sup>C NMR (400 MHz, CDCl<sub>3</sub>) δ: 212.5, 211.6, 171.3, 159.2, 158.8, 136.0, 132.1, 131.7, 130.8, 130.5, 130.4, 126.5, 121.3, 120.2, 118.9, 114.2, 113.7, 113.1, 110.6, 109.4, 71.6, 61.3, 56.1, 55.2, 55.1, 54.8, 51.0, 47.8, 45.8, 30.3, 28.9, 28.1, 13.9; IR (KBr) ν: 3410, 3058, 2966, 1871, 1736, 1654, 1646, 1578, 1432, 1364, 1300, 1247, 1157, 899, 765 cm<sup>-1</sup>; MS (*m/z*): HRMS (ESI) Calcd. for C<sub>36</sub>H<sub>37</sub>NO<sub>6</sub>([M+Na]<sup>+</sup>): 602.2513, found: 602.2507.

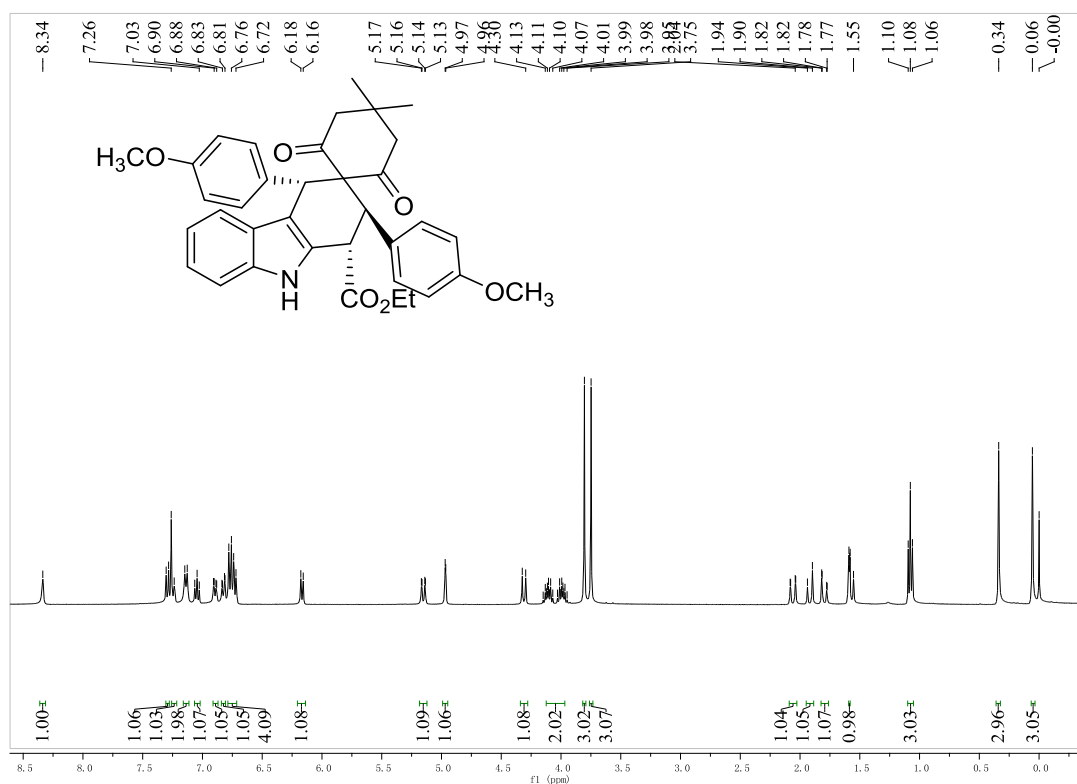



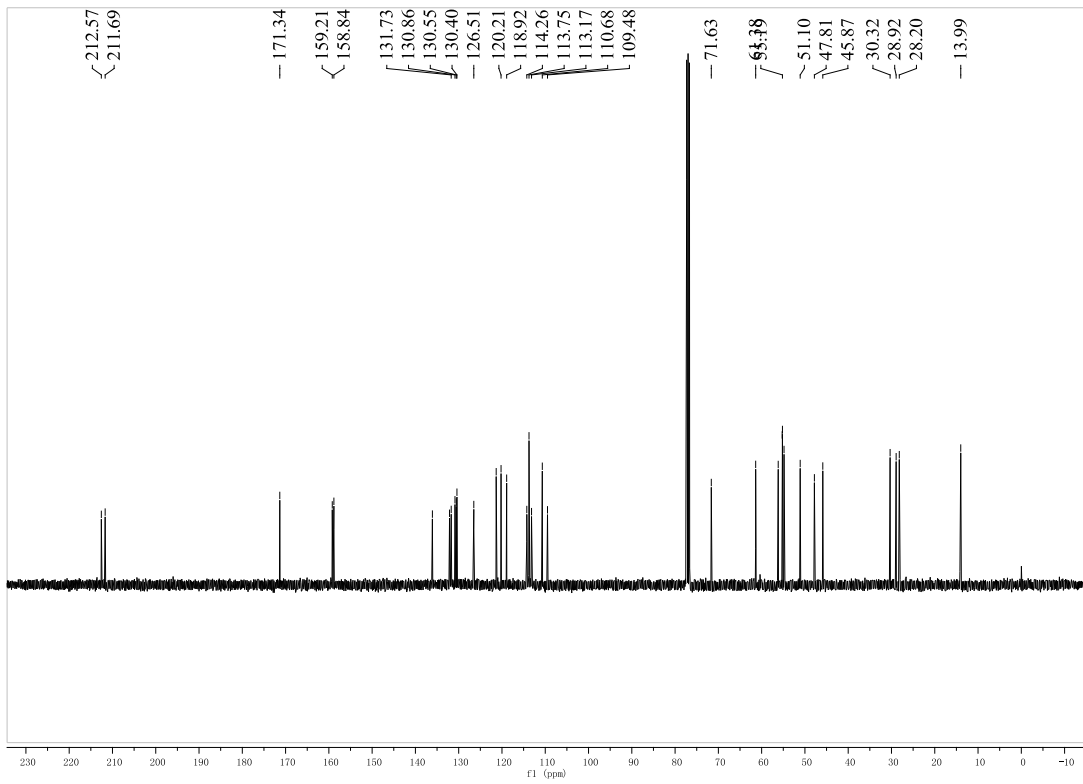

ZGC12\_20210120104032\_#34.DT: 0.43 AV: 1 NL: 1.01E+006  
 Full [438899.999-1500.0000]  
 [438899.999-1500.0000]  
 [438899.999-1500.0000]

## Ethyl

### *rel*-(1S,2R,4S)-2,4-bis(3-chlorophenyl)-4',4'-dimethyl-2',6'-dioxo-1,2,4,9-tetrahydrospiro[carbazole-3,1'-cyclohexane]-1-carboxylate (2n):

white solid, 50%, m.p. 190-193 °C; <sup>1</sup>H NMR (400 MHz, CDCl<sub>3</sub>) δ: 8.43 (s, 1H, NH), 7.35-7.31 (m, 3H, ArH), 7.23-7.19 (m, 3H, ArH), 7.17-7.05 (m, 3H, ArH), 6.91-6.75 (m, 2H, ArH), 6.17-6.13 (m, 1H, ArH), 5.15 (dd, *J*<sub>1</sub> = 11.2 Hz, *J*<sub>2</sub> = 2.0 Hz, 1H, CH), 4.98 (d, *J* = 14.4 Hz, 1H, CH), 4.30 (d, *J* = 11.2 Hz, 1H, CH), 4.04 (q, *J* = 7.2 Hz, 2H, CH<sub>2</sub>), 2.16-2.05 (m, 1H, CH), 1.96-1.76 (m, 2H, CH), 1.53-1.45 (m, 1H, CH), 1.09 (t, *J* = 7.2 Hz, 3H, CH<sub>3</sub>), 0.37 (s, 3H, CH<sub>3</sub>), 0.09 (s, 3H, CH<sub>3</sub>); <sup>13</sup>C NMR (400 MHz, CDCl<sub>3</sub>) δ: 211.5, 210.7, 170.7, 140.8, 140.6, 136.1, 136.0, 134.4, 130.9, 130.8, 130.1, 130.1, 129.9, 129.7, 128.9, 128.2, 127.9, 126.0, 121.7, 119.9, 119.2, 110.9, 71.0, 61.6, 56.1, 54.7, 51.3, 48.3, 48.2, 48.2, 45.4, 30.3, 28.9, 28.1, 13.9; IR (KBr) ν: 3433, 3051, 2963, 1841, 1766, 1680, 1631, 1531, 1445, 1317, 1290, 1241, 1164, 921, 854, 746 cm<sup>-1</sup>; MS (*m/z*): HRMS (ESI) Calcd. for C<sub>34</sub>H<sub>31</sub>ClNO<sub>4</sub>([M+Na]<sup>+</sup>): 610.1522, found: 610.1515.

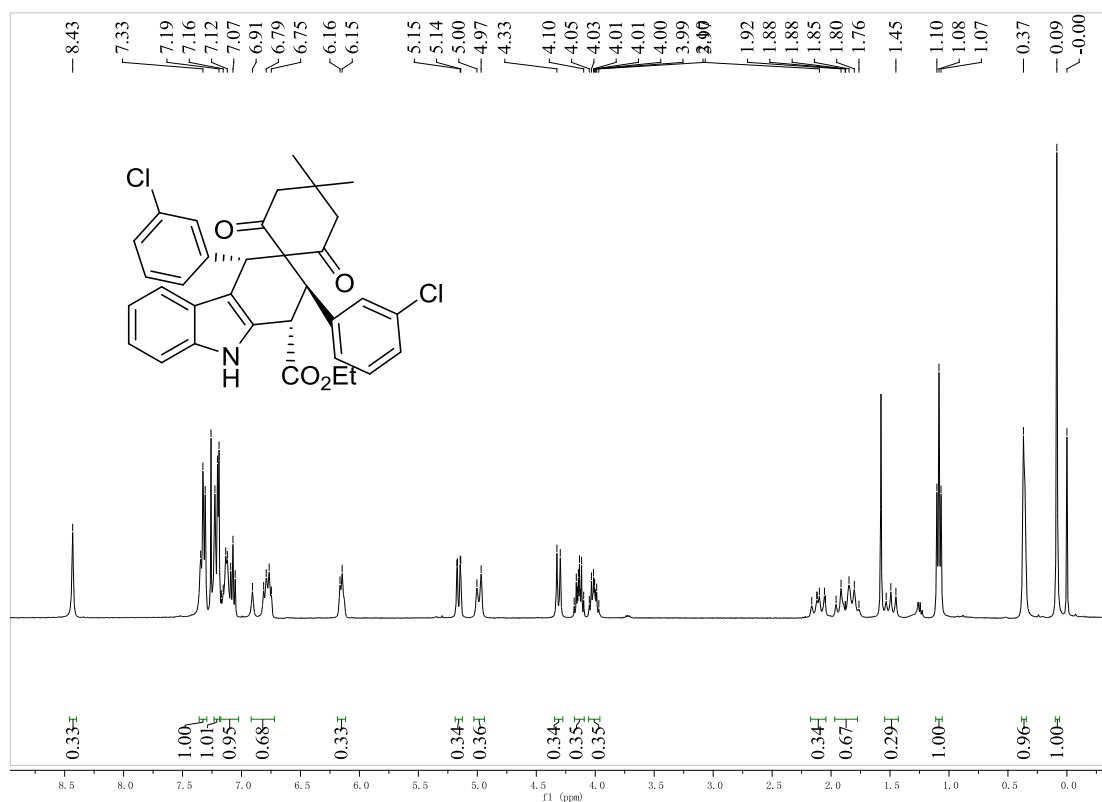

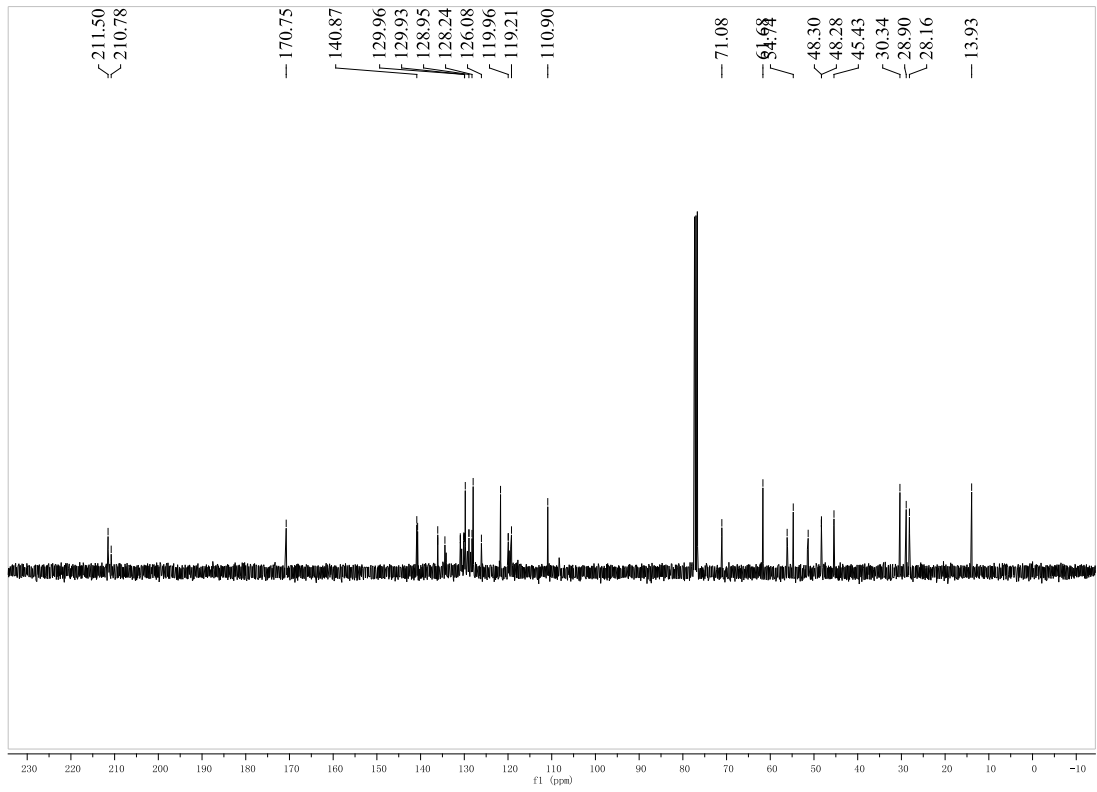

Z6C15\_20210130105821 #25 RT: 0.32 AV: 1 NL: 7.71E+005  
 12.3371925 S Full.ms [100.0000-1500.0000]  
 13C NMR (100 MHz, CDCl3)  $\delta$  211.50, 210.78, 170.75, 140.87, 129.96, 129.93, 128.95, 128.24, 126.08, 119.96, 119.21, 110.90, 71.08, 54.68, 48.30, 48.28, 45.43, 30.34, 28.90, 28.16, 13.93.

## Ethyl

### *re*-(1*R*,2*S*,4*S*)-2,4-bis(3-chlorophenyl)-4',4'-dimethyl-2',6'-dioxo-1,2,4,9-tetrahydrospiro[carbazole-3,1'-cyclohexane]-1-carboxylate (2n')

white solid, 6%, m.p. 167-169 °C;  $^1\text{H}$  NMR (400 MHz,  $\text{CDCl}_3$ )  $\delta$ : 8.35 (s, 1H, NH), 7.42 (s, 1H, ArH), 7.34-7.30 (m, 2H, ArH), 7.27-7.26 (m, 2H, ArH), 7.23-7.21 (m, 2H, ArH), 7.20-7.19 (m, 2H, ArH), 7.14 (d,  $J = 7.2$  Hz, 1H, ArH), 7.11-7.08 (m, 3H, ArH), 6.97 (t,  $J = 7.2$  Hz, 1H, ArH), 5.07 (d,  $J = 10.4$  Hz, 1H, CH), 4.71 (s, 1H, CH), 4.57 (d,  $J = 10.4$  Hz, 1H, CH), 4.20 (q,  $J = 7.2$  Hz, 2H,  $\text{CH}_2$ ), 3.03 (d,  $J = 14.2$  Hz, 1H, CH), 2.68 (d,  $J = 14.2$  Hz, 1H, CH), 2.38 (d,  $J = 14.2$  Hz, 1H, CH), 2.31 (d,  $J = 14.2$  Hz, 1H, CH), 1.27 (t,  $J = 7.2$  Hz, 3H,  $\text{CH}_3$ ), 1.07 (s, 3H,  $\text{CH}_3$ ), 0.35 (s, 3H,  $\text{CH}_3$ );  $^{13}\text{C}$  NMR (400 MHz,  $\text{CDCl}_3$ )  $\delta$ : 208.0, 204.5, 171.2, 141.4, 140.8, 136.3, 134.3, 133.4, 130.5, 129.7, 128.9, 128.2, 127.3, 127.2, 125.9, 122.4, 119.7, 117.7, 117.7, 111.0, 72.3, 61.9, 53.8, 52.1, 46.8, 30.5, 14.1; IR (KBr)  $\nu$ : 3403, 3071, 2982, 1900, 1843, 1710, 1631, 1546, 1433, 1369, 1260, 1269, 1180, 951, 833, 767  $\text{cm}^{-1}$ ; MS ( $m/z$ ): HRMS (ESI) Calcd. for  $\text{C}_{34}\text{H}_{31}\text{Cl}_2\text{NO}_4$  ( $[\text{M}+\text{Na}]^+$ ): 610.1522, found: 610.1519.

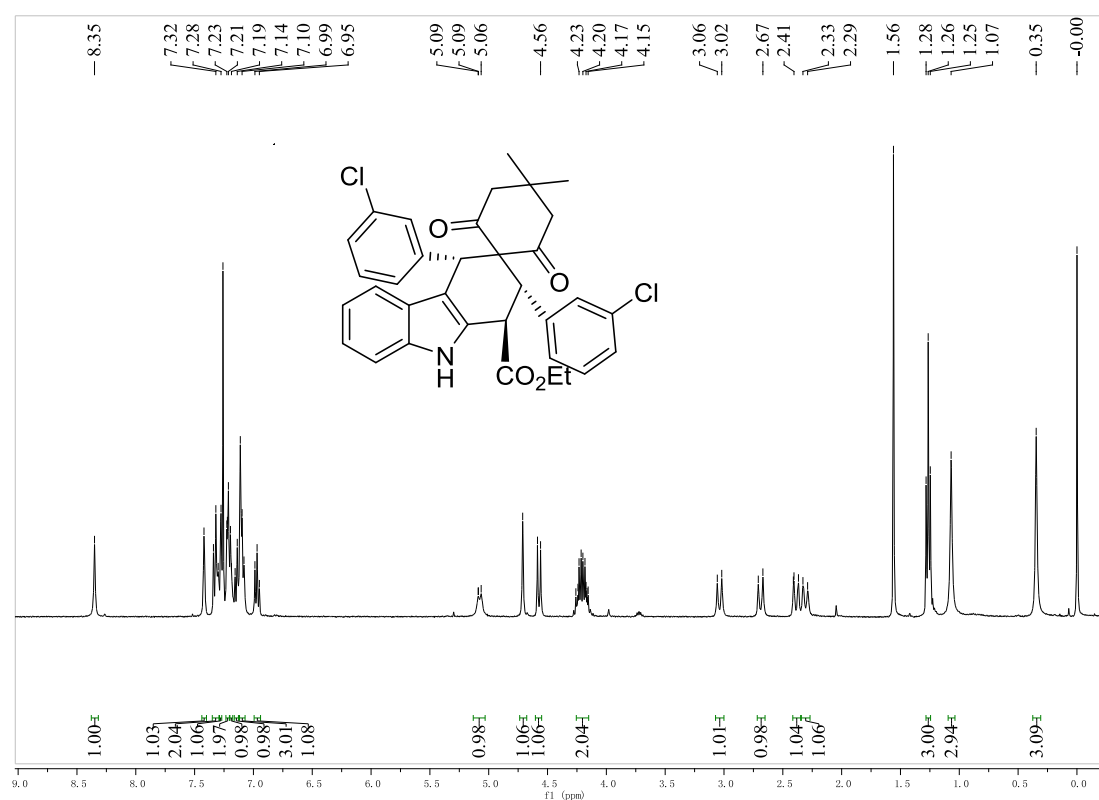



## Ethyl

### *rel*-(1*S*,2*R*,4*S*)-4',4'-dimethyl-2,4-bis(4-nitrophenyl)-2',6'-dioxo-1,2,4,9-tetrahydrospiro[carbazole-3,1'-cyclohexane]-1-carboxylate (**2o**):

white solid, 51%, m.p. 190-193 °C; <sup>1</sup>H NMR (400 MHz, CDCl<sub>3</sub>) δ: 8.52 (s, 1H, NH), 8.31-8.30 (m, 1H, ArH), 8.14 (d, *J* = 8.4 Hz, 2H, ArH), 8.08-8.07 (m, 1H, ArH), 7.56-7.55 (m, 1H, ArH), 7.44 (d, *J* = 8.4 Hz, 2H, ArH), 7.34 (d, *J* = 8.0 Hz, 1H, ArH), 7.11-7.08 (m, 2H, ArH), 6.75 (d, *J* = 8.0 Hz, 1H, ArH), 5.96 (d, *J* = 8.0 Hz, 1H, ArH), 5.24 (dd, *J*<sub>1</sub> = 11.2 Hz, *J*<sub>2</sub> = 1.6 Hz, 1H, CH), 5.13 (s, 1H, CH), 4.51 (d, *J* = 11.6 Hz, 1H, CH), 4.07 (q, *J* = 7.2 Hz, 2H, CH<sub>2</sub>), 2.11 (d, *J* = 17.2 Hz, 1H, CH), 1.88-1.87 (m, 2H, CH<sub>2</sub>), 1.46 (d, *J* = 17.2 Hz, 1H, CH), 1.09 (t, *J* = 7.2 Hz, 3H, CH<sub>3</sub>), 0.33 (s, 3H, CH<sub>3</sub>), 0.07 (s, 3H, CH<sub>3</sub>); <sup>13</sup>C NMR (400 MHz, CDCl<sub>3</sub>) δ: 210.8, 210.0, 170.1, 147.6, 147.2, 146.1, 136.1, 131.9, 129.8, 125.6, 123.7, 123.6, 122.1, 119.6, 119.3, 111.1, 107.5, 71.1, 62.0, 56.3, 54.8, 51.6, 48.2, 45.2, 30.3, 29.1, 28.0, 14.0; IR (KBr) ν: 3454, 3078, 2967, 1884, 1772, 1681, 1645, 1587, 1454, 1367, 1331, 1267, 1148, 833, 782 cm<sup>-1</sup>; MS (*m/z*): HRMS (ESI) Calcd. for C<sub>34</sub>H<sub>31</sub>N<sub>3</sub>O<sub>8</sub> ([M+Na]<sup>+</sup>): 632.2003, found: 632.1993.

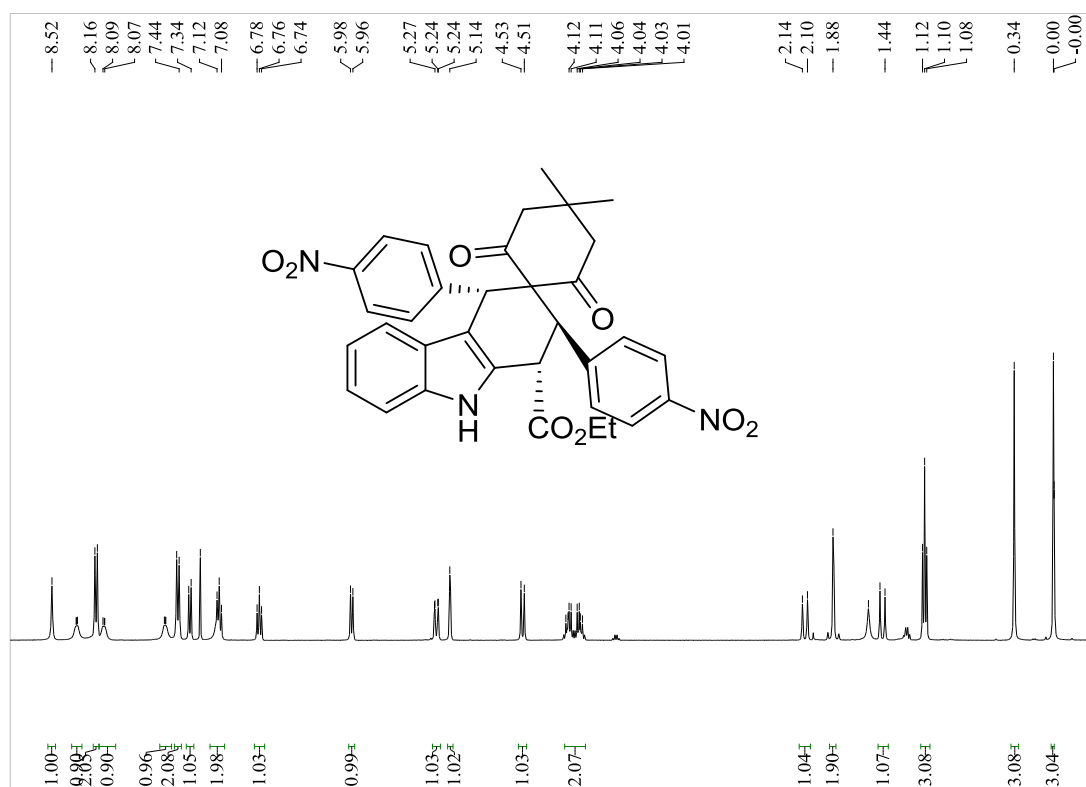

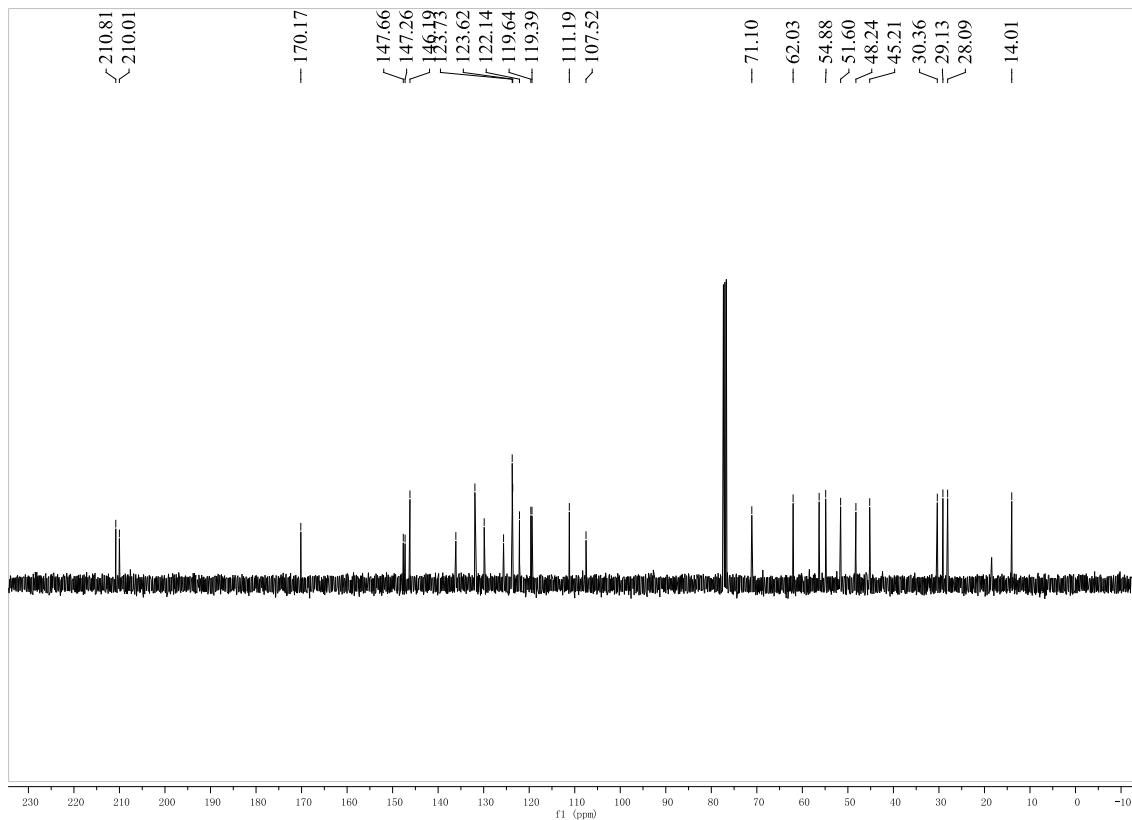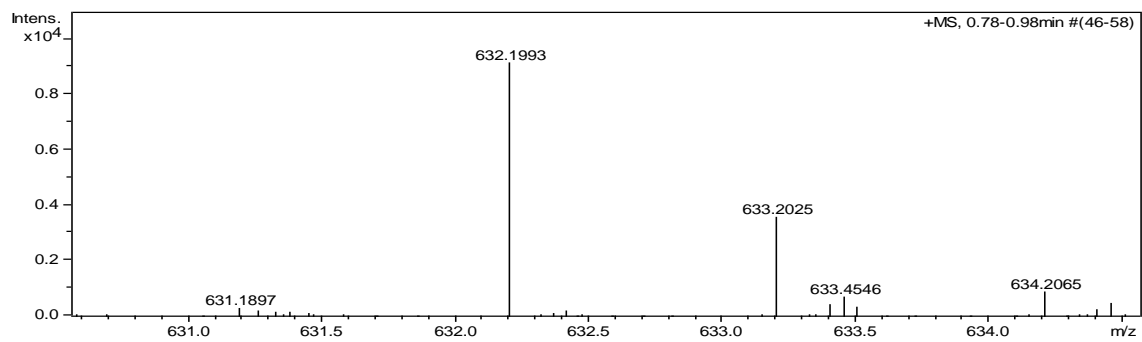

## Ethyl

### *rel*-(1*S*,2*R*,4*S*)-4',4'-dimethyl-2,4-bis(4-nitrophenyl)-2',6'-dioxo-1,2,4,9-tetrahydrospiro[carbazole-3,1'-cyclohexane]-1-carboxylate (2o')

white solid, 7%, m.p. 176-178 °C; <sup>1</sup>H NMR (400 MHz, CDCl<sub>3</sub>) δ: 8.42 (s, 1H, NH), 8.16 (d, *J* = 8.4 Hz, 2H, ArH), 8.04 (d, *J* = 8.8 Hz, 2H, ArH), 7.62-7.61 (m, 2H, ArH), 7.49 (d, *J* = 8.4 Hz, 2H, ArH), 7.36 (d, *J* = 8.4 Hz, 1H, ArH), 7.17 (t, *J* = 7.6 Hz, 1H, ArH), 7.05-6.96 (m, 2H, ArH), 5.18-5.12 (m, 1H, ArH), 4.91 (s, 1H, CH), 4.69 (d, *J* = 10.4 Hz, 1H, CH), 4.21 (q, *J* = 7.2 Hz, 2H, CH<sub>2</sub>), 3.10 (d, *J* = 14.4 Hz, 1H, CH), 2.71 (d, *J* = 14.4 Hz, 1H, CH), 2.45 (d, *J* = 14.4 Hz, 1H, CH), 2.36-2.32 (m, 1H, CH), 1.27 (t, *J* = 7.2 Hz, 3H, CH<sub>3</sub>), 1.10 (s, 3H, CH<sub>3</sub>), 0.32 (s, 3H, CH<sub>3</sub>); <sup>13</sup>C NMR (400 MHz, CDCl<sub>3</sub>) δ: 207.5, 204.8, 204.8, 170.7, 147.4, 146.9, 146.7, 145.9, 136.4, 133.3, 129.9, 129.8, 129.8, 125.5, 123.8, 122.9, 120.1, 117.5, 117.4, 111.2, 109.9, 72.4, 62.2, 53.9, 52.0, 46.4, 46.4, 30.7, 14.2; IR (KBr) ν: 3400, 3098, 2974, 1863, 1755, 1678, 1664, 1581, 1417, 1309, 1287, 1240, 1113, 854, 763 cm<sup>-1</sup>; MS (*m/z*): HRMS (ESI) Calcd. for C<sub>34</sub>H<sub>31</sub>N<sub>3</sub>O<sub>8</sub>[M+Na]<sup>+</sup>: 632.2003, found: 632.1995.

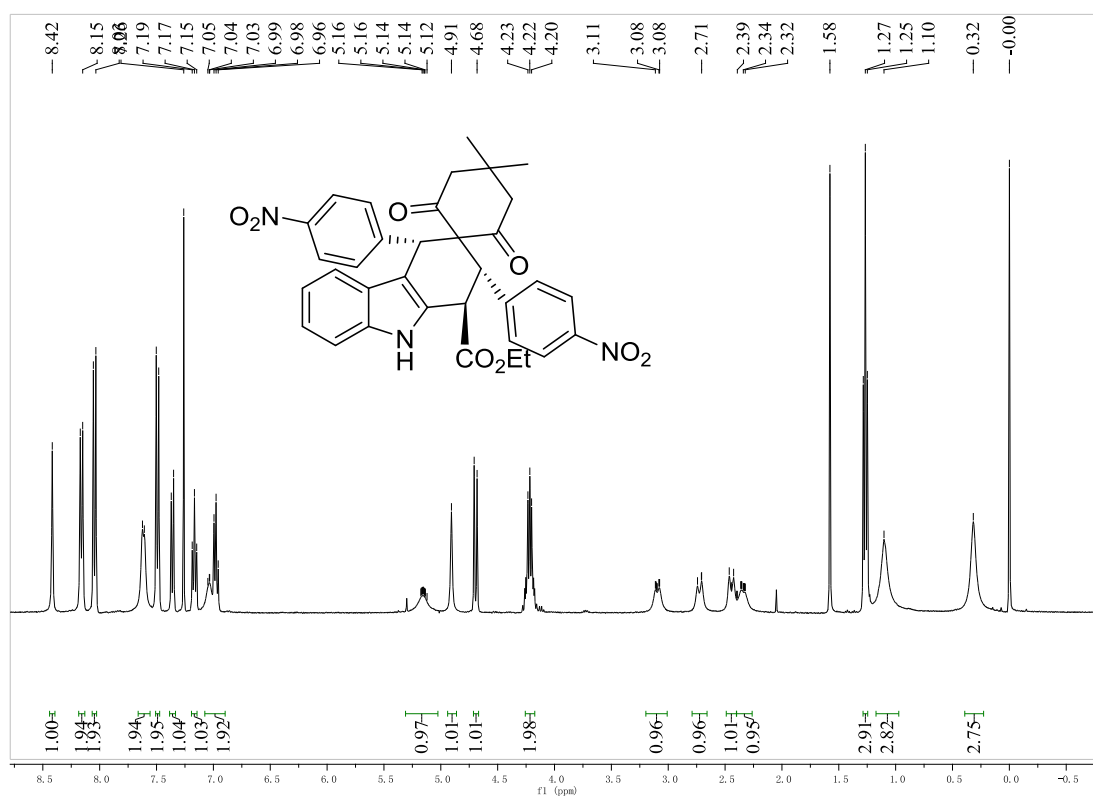



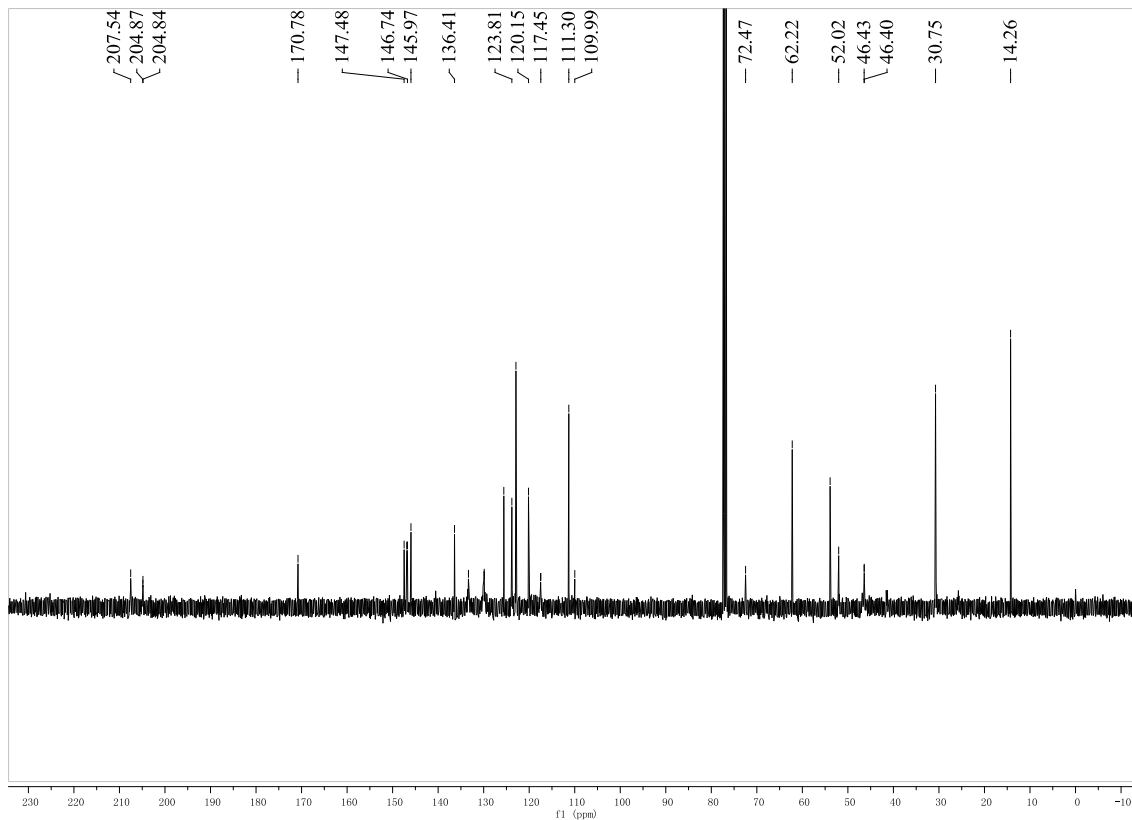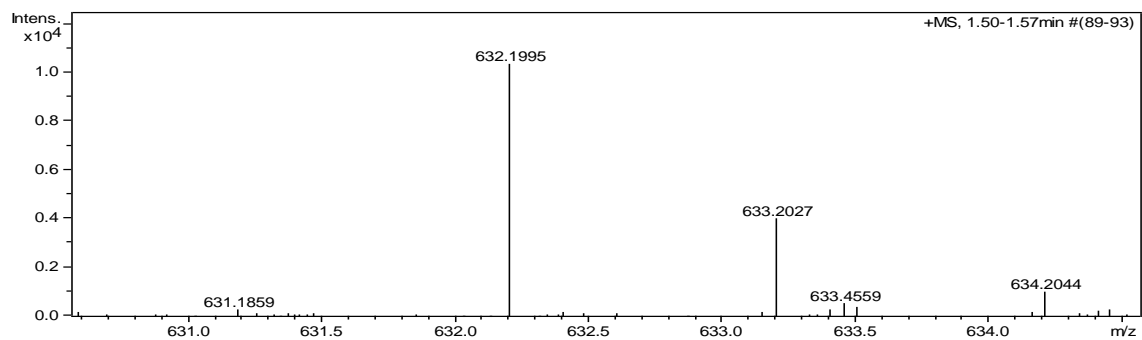

## Ethyl

### 4-(4-methoxyphenyl)-1',3'-dimethyl-2',4',6'-trioxo-2-phenyl-1',3',4',6'-tetrahydro-2'H-spiro[carbazole-3,5'-pyrimidine]-1-carboxylate (3a):

yellow solid, 70%, m.p. 209-213 °C;  $^1\text{H}$  NMR (400 MHz,  $\text{CDCl}_3$ )  $\delta$ : 7.69 (d,  $J = 7.6$  Hz, 1H, ArH), 7.36-7.26 (m, 4H, ArH), 7.14-7.09 (m, 4H, ArH), 6.99-6.95 (m, 3H, ArH), 6.47 (d,  $J = 7.6$  Hz, 1H, ArH), 4.08 (q,  $J = 7.2$  Hz, 2H,  $\text{CH}_2$ ), 3.84 (s, 3H,  $\text{OCH}_3$ ), 3.05 (s, 3H,  $\text{CH}_3$ ), 3.04 (s, 3H,  $\text{CH}_3$ ), 0.84 (t,  $J = 7.2$  Hz, 3H,  $\text{CH}_3$ );  $^{13}\text{C}$  NMR (400 MHz,  $\text{CDCl}_3$ )  $\delta$ : 164.7, 164.4, 160.5, 159.8, 157.6, 149.3, 144.4, 142.1, 136.7, 134.2, 132.2, 130.2, 129.5, 129.4, 128.5, 128.4, 126.4, 125.8, 125.8, 122.9, 121.6, 114.7, 67.1, 61.4, 55.3, 28.9, 13.5; IR(KBr)  $\nu$ : 3234, 3173, 3048, 2955, 2867, 2187, 1844, 1657, 1621, 1564, 1488, 1375, 1287, 1154, 1134, 951, 938, 821, 769  $\text{cm}^{-1}$ ; MS ( $m/z$ ): HRMS (ESI) Calcd. for  $\text{C}_{33}\text{H}_{27}\text{N}_3\text{O}_6$  ( $[\text{M}+\text{H}]^+$ ): 562.1973, found: 562.1973.

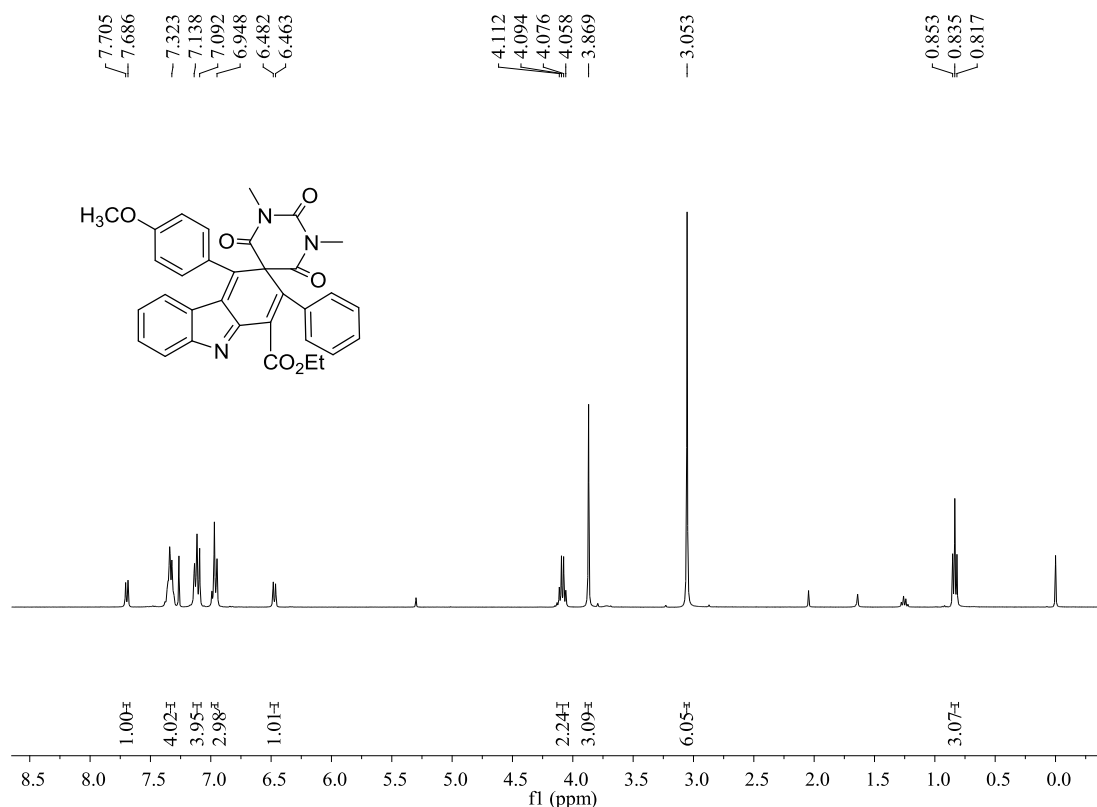

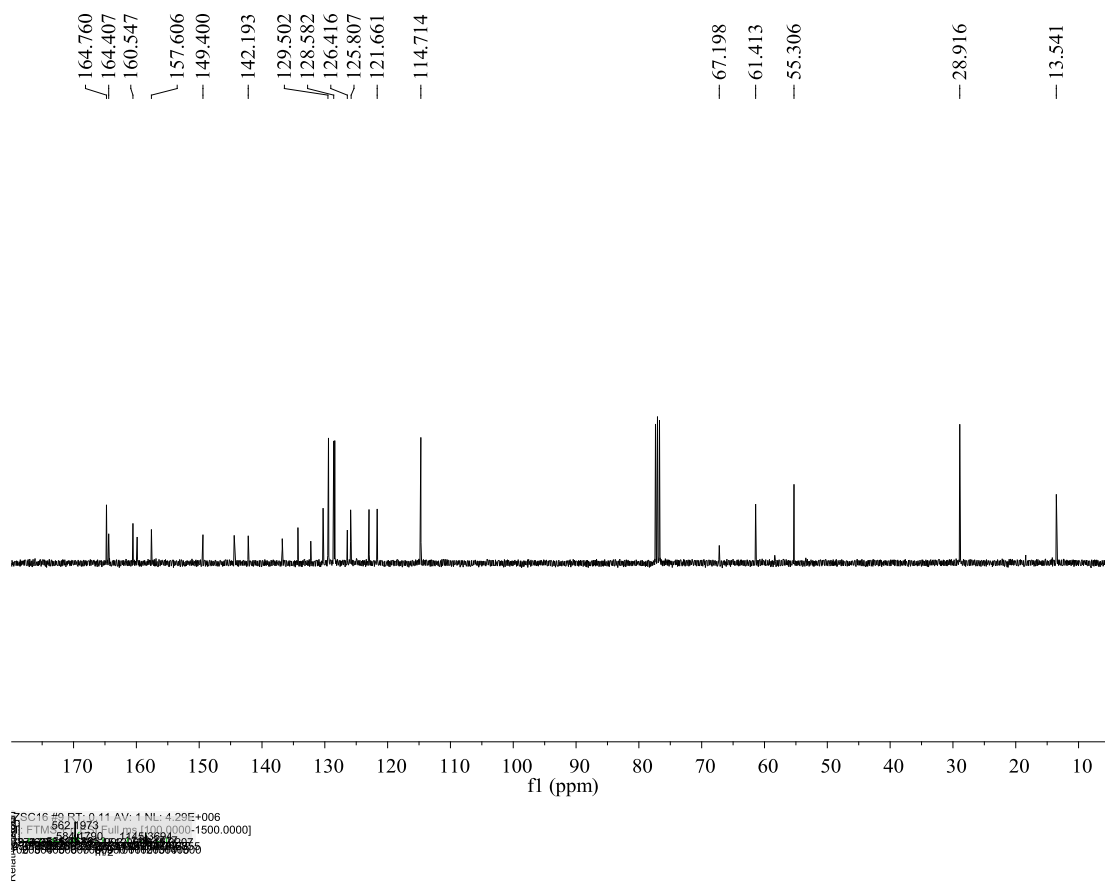

## Ethyl

### 1',3'-dimethyl-2-(4-nitrophenyl)-2',4',6'-trioxo-4-(*p*-tolyl)-1',3',4',6'-tetrahydro-2'*H*-spiro[carbazole-3,5'-pyrimidine]-1-carboxylate (3b):

yellow solid, 65%, m.p. 209-213 °C; <sup>1</sup>H NMR (400 MHz, CDCl<sub>3</sub>) δ: 8.19 (d, *J* = 8.0 Hz, 2H, ArH), 7.69 (d, *J* = 8.0 Hz, 1H, ArH), 7.41 (d, *J* = 8.0 Hz, 2H, ArH), 7.35 (t, *J* = 7.6 Hz, 1H, ArH), 7.28 (d, *J* = 6.8 Hz, 2H, ArH), 7.00 (d, *J* = 8.0 Hz, 2H, ArH), 6.96 (d, *J* = 7.6 Hz, 1H, ArH), 6.37 (d, *J* = 7.6 Hz, 1H, ArH), 4.12 (q, *J* = 6.8 Hz, 2H, CH<sub>2</sub>), 3.06 (s, 3H, CH<sub>3</sub>), 3.05 (s, 3H, CH<sub>3</sub>), 2.43 (s, 3H, CH<sub>3</sub>), 0.94 (t, *J* = 6.8 Hz, 3H, CH<sub>3</sub>); <sup>13</sup>C NMR (400 MHz, CDCl<sub>3</sub>) δ: 164.3, 163.8, 159.1, 157.4, 149.0, 148.2, 141.5, 141.3, 140.4, 136.1, 133.5, 130.5, 130.4, 130.1, 127.3, 126.3, 123.5, 123.0, 121.9, 66.7, 61.8, 29.0, 21.4, 13.7; IR(KBr) ν: 3245, 3182, 3065, 2988, 2867, 2167, 1836, 1647, 1654, 1565, 1488, 1332, 1225, 1158, 976, 952, 812, 721 cm<sup>-1</sup>; MS (*m/z*): HRMS (ESI) Calcd. for C<sub>33</sub>H<sub>26</sub>N<sub>4</sub>O<sub>7</sub> ([M+Na]<sup>+</sup>): 613.1694, found: 613.1696.

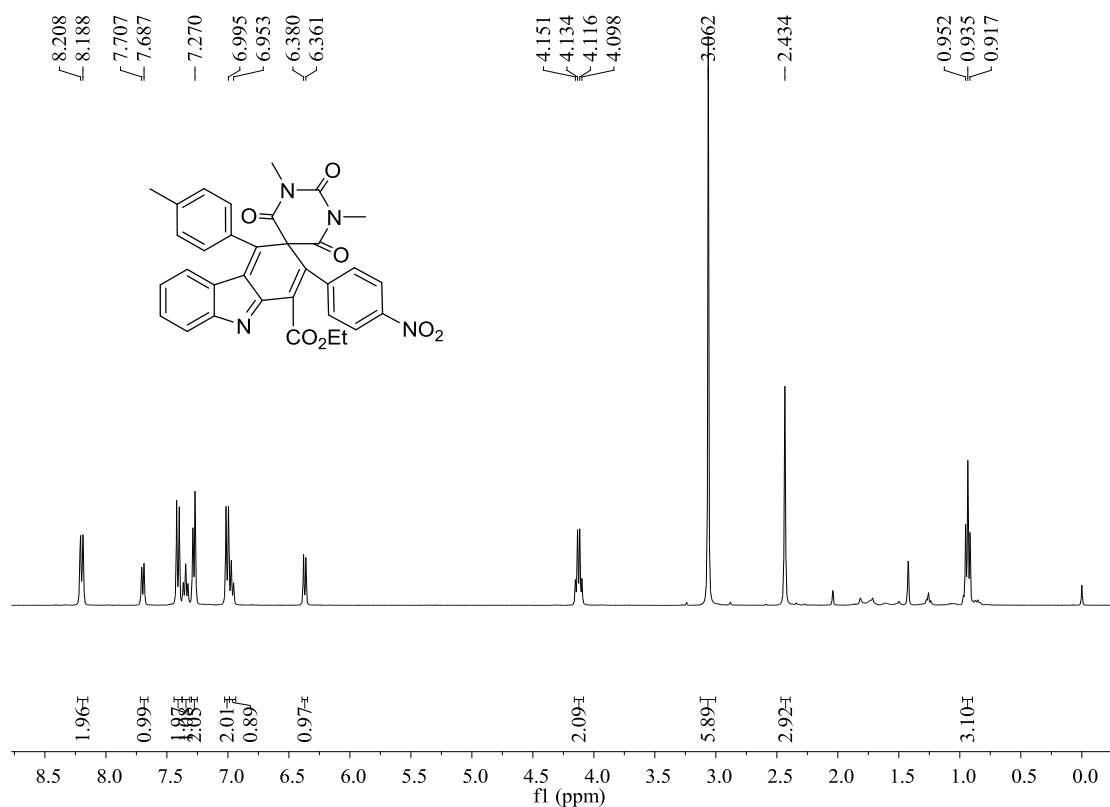



## Ethyl

### 1',3'-dimethyl-2-(4-nitrophenyl)-2',4',6'-trioxo-4-(*p*-tolyl)-1',3',4',6'-tetrahydro-2'*H*-spiro[carbazole-3,5'-pyrimidine]-1-carboxylate (3c):

yellow solid, 73%, m.p. 209-213 °C; <sup>1</sup>H NMR (400 MHz, CDCl<sub>3</sub>) δ: 7.68 (d, *J* = 7.6 Hz, 1H, ArH), 7.32 (t, *J* = 7.2 Hz, 1H, ArH), 7.27-7.23 (m, 2H, ArH), 7.11 (d, *J* = 8.0 Hz, 2H, ArH), 7.04 (d, *J* = 7.6 Hz, 2H, ArH), 7.00 (d, *J* = 8.0 Hz, 2H, ArH), 6.95 (t, *J* = 7.2 Hz, 1H, ArH), 6.40 (d, *J* = 7.6 Hz, 1H, ArH), 4.10 (q, *J* = 6.8 Hz, 2H, CH<sub>2</sub>), 3.05 (s, 3H, CH<sub>3</sub>), 3.04 (s, 3H, CH<sub>3</sub>), 2.42 (s, 3H, CH<sub>3</sub>), 2.33 (s, 3H, CH<sub>3</sub>), 0.88 (t, *J* = 6.8 Hz, 3H, CH<sub>3</sub>); <sup>13</sup>C NMR (400 MHz, CDCl<sub>3</sub>) δ: 164.7, 164.5, 159.9, 157.6, 149.4, 144.7, 142.3, 139.9, 139.4, 136.4, 132.2, 131.3, 130.7, 130.2, 130.0, 129.0, 128.4, 127.7, 126.3, 125.8, 122.9, 121.5, 67.1, 61.3, 28.8, 21.4, 21.2, 13.5; IR(KBr) ν: 3218, 3143, 3056, 2931, 2811, 2145, 1889, 1667, 1612, 1548, 1431, 1346, 1278, 1163, 1147, 982, 941, 878, 763 cm<sup>-1</sup>; MS (*m/z*): HRMS (ESI) Calcd. for C<sub>34</sub>H<sub>29</sub>N<sub>3</sub>O<sub>5</sub> ([M+H]<sup>+</sup>): 560.2180, found: 560.2182.

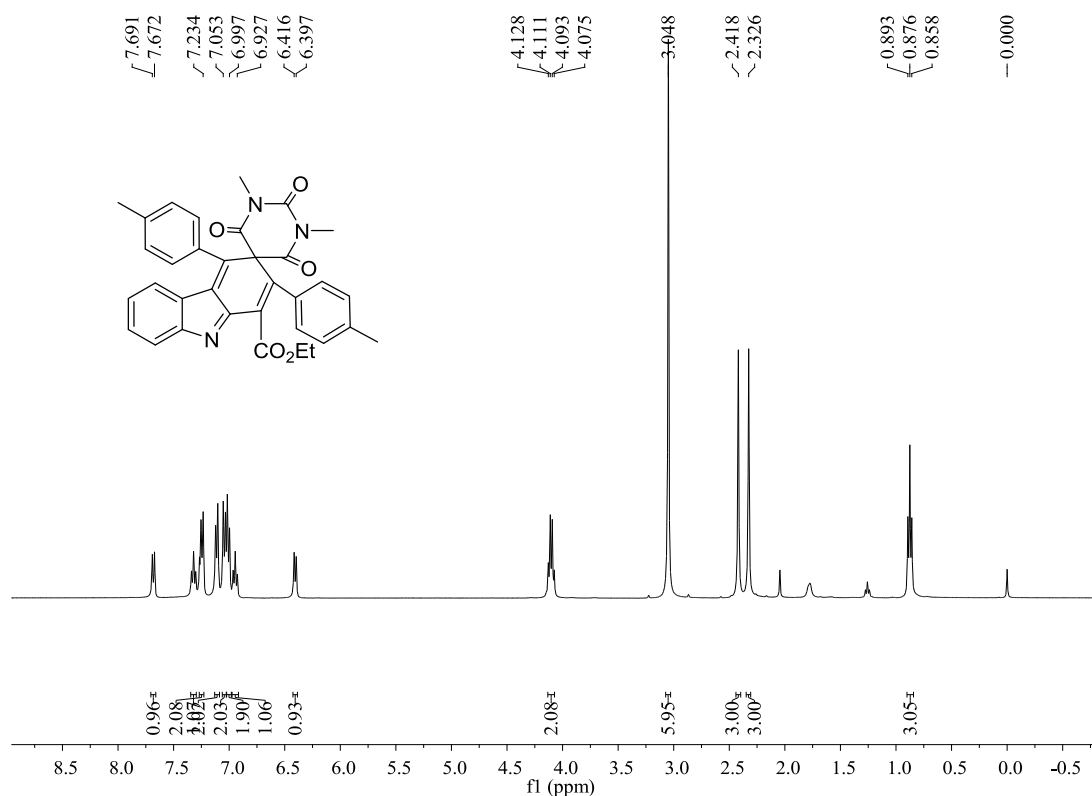



## Ethyl

### 2,4-bis(3-methoxyphenyl)-1',3'-dimethyl-2',4',6'-trioxo-1',3',4',6'-tetrahydro-2'H-spiro[carbazole-3,5'-pyrimidine]-1-carboxylate (3d):

yellow solid, 70%, m.p. 209-213 °C; <sup>1</sup>H NMR (400 MHz, CDCl<sub>3</sub>) δ: 7.69 (d, *J* = 7.6 Hz, 1H, ArH), 7.39-7.32 (m, 2H, ArH), 7.23 (t, *J* = 8.0 Hz, 1H, ArH), 7.03-6.95 (m, 2H, ArH), 6.88 (dd, *J*<sub>1</sub> = 8.4 Hz, *J*<sub>2</sub> = 2.4 Hz, 1H, ArH), 6.75-6.68 (m, 4H, ArH), 6.44 (d, *J* = 7.6 Hz, 1H, ArH), 4.12 (q, *J* = 6.8 Hz, 2H, CH<sub>2</sub>), 3.77 (s, 3H, OCH<sub>3</sub>), 3.75 (s, 3H, OCH<sub>3</sub>), 3.08 (s, 3H, CH<sub>3</sub>), 3.06 (s, 3H, CH<sub>3</sub>), 0.89 (t, *J* = 6.8 Hz, 3H, CH<sub>3</sub>); <sup>13</sup>C NMR (400 MHz, CDCl<sub>3</sub>) δ: 164.3, 160.0, 159.3, 157.6, 149.4, 144.1, 141.6, 136.3, 135.4, 134.8, 132.1, 130.5, 130.4, 129.6, 126.1, 125.9, 123.0, 121.6, 120.8, 119.9, 115.5, 115.2, 114.0, 113.1, 66.8, 61.4, 55.3, 55.3, 28.9, 13.6; IR(KBr) ν: 3217, 3142, 3064, 2917, 2833, 2165, 1849, 1631, 1611, 1548, 1433, 1346, 1271, 1164, 1131, 912, 888, 823, 764 cm<sup>-1</sup>; MS (*m/z*): HRMS (ESI) Calcd. for C<sub>34</sub>H<sub>29</sub>N<sub>3</sub>O<sub>7</sub> ([M+H]<sup>+</sup>): 592.2078, found: 592.2080.

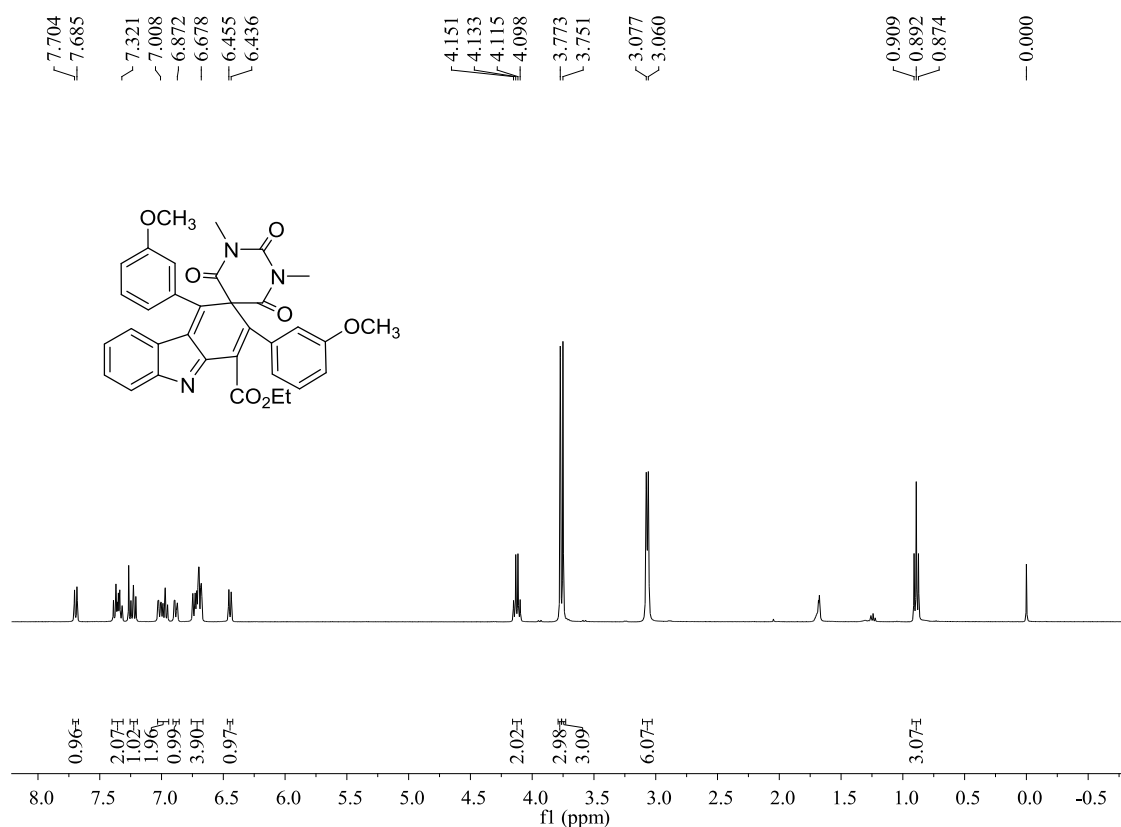



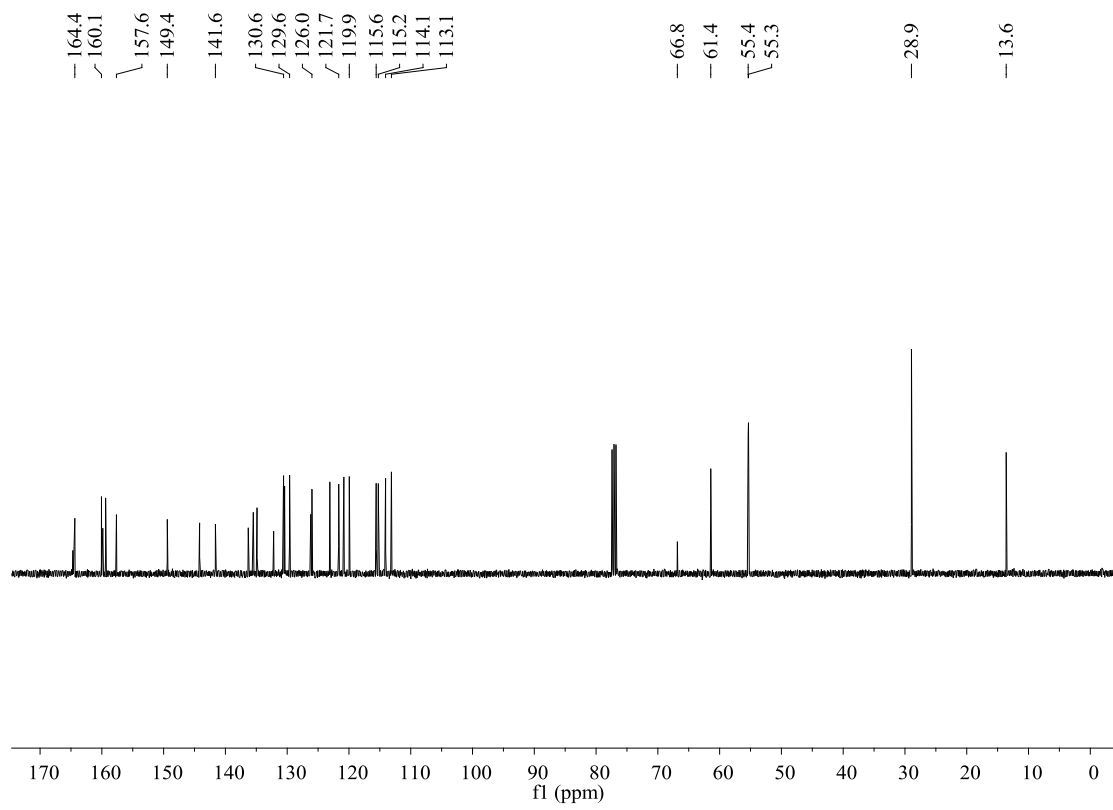

ZSC19 #9 RT: 0.11 AV: 1 NL: 3.58E+006  
 FTMS: 592.0080 [1206.9310-1500.0000]  
 6.471805 [1206.9310-1500.0000]  
 6.471805 [1206.9310-1500.0000]  
 6.471805 [1206.9310-1500.0000]  
 6.471805 [1206.9310-1500.0000]

**6-(1-((Ethylperoxy)- $\lambda^2$ -methyl)-2,4-di-*p*-tolyl-9*H*-carbazol-3-yl)-3,4-dihydro-2*H*-pyran-2-one**

**(4a):**

yellow solid, 70%, m.p. 196-199 °C; <sup>1</sup>H NMR (400 MHz, CDCl<sub>3</sub>)  $\delta$ : 10.15 (s, 1H, NH), 7.46 (d, *J* = 8.4 Hz, 1H, ArH), 7.36 (t, *J* = 8.4 Hz, 1H, ArH), 7.30 (d, *J* = 7.6 Hz, 2H, ArH), 6.95 (t, *J* = 8.0 Hz, 1H, ArH), 6.89 (d, *J* = 8.0 Hz, 1H, ArH), 4.81-4.80 (m, 1H, CH), 4.04 (q, *J* = 7.2 Hz, 2H, CH<sub>2</sub>), 2.45 (s, 3H, CH<sub>3</sub>), 2.37 (s, 3H, CH<sub>3</sub>), 1.84-1.85 (m, 4H, CH), 0.82 (t, *J* = 7.2 Hz, 3H, CH<sub>3</sub>); <sup>13</sup>C NMR (400 MHz, CDCl<sub>3</sub>)  $\delta$ : 199.1, 176.1, 144.4, 141.5, 138.6, 138.6, 136.7, 135.6, 133.5, 131.9, 129.9, 129.4, 129.0, 128.7, 128.6, 127.5, 127.4, 127.3, 126.6, 121.8, 119.4, 118.9, 114.2, 114.0, 112.8, 112.5, 110.8, 109.6, 54.3, 47.1, 44.0, 43.9, 24.7, 21.6; IR (KBr)  $\nu$ : 3411, 3251, 3054, 2973, 1864, 1755, 1682, 1617, 1567, 1456, 1387, 1356, 1278, 1171, 937, 854 cm<sup>-1</sup>; MS (*m/z*): HRMS (ESI) Calcd. for C<sub>34</sub>H<sub>29</sub>NO<sub>4</sub>([M+Na]<sup>+</sup>): 538.1989, found: 538.1994.

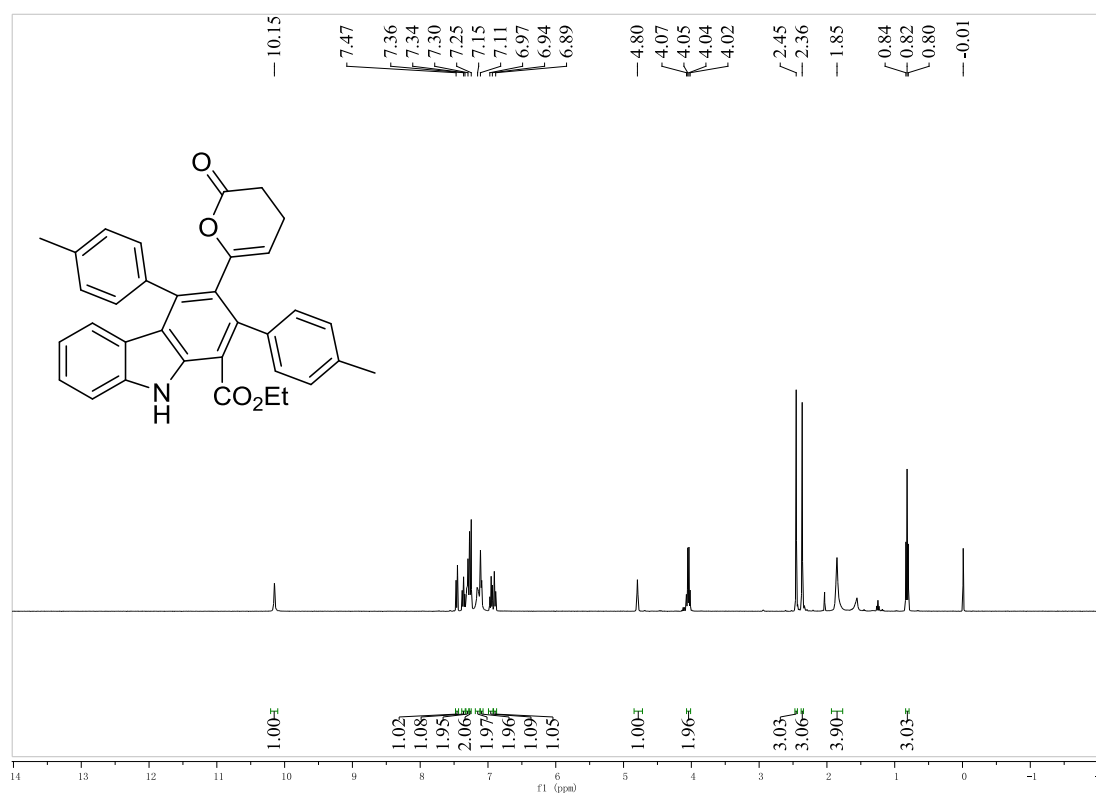

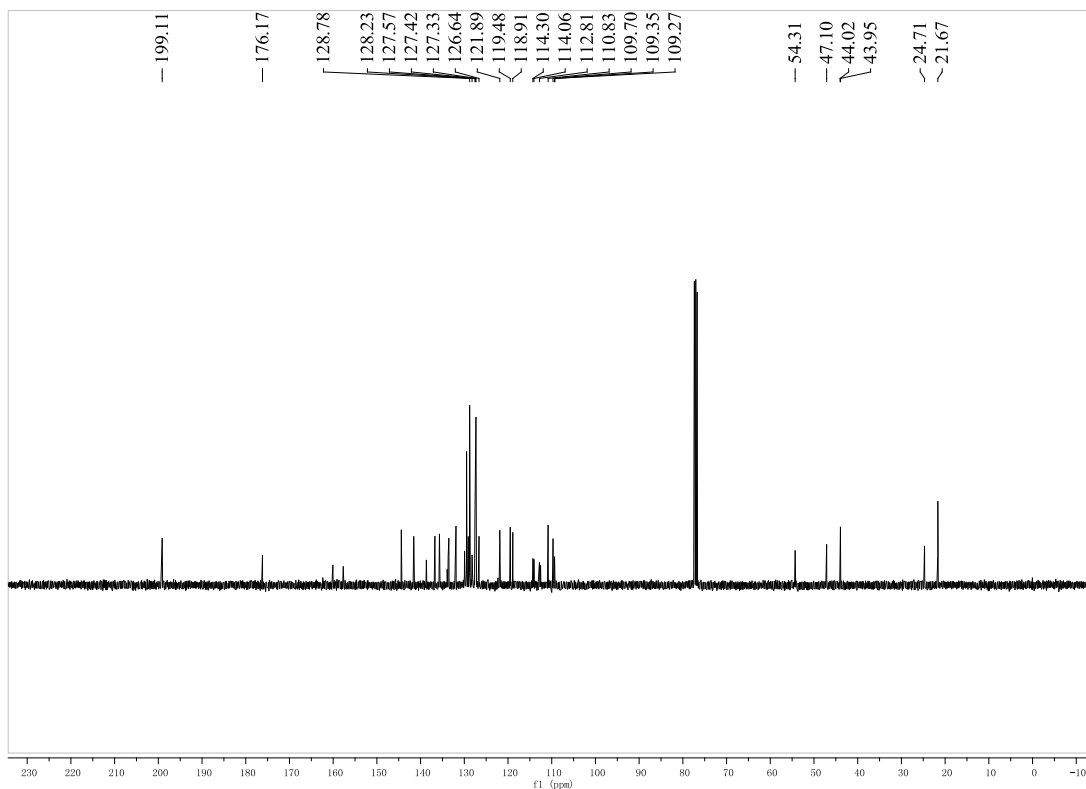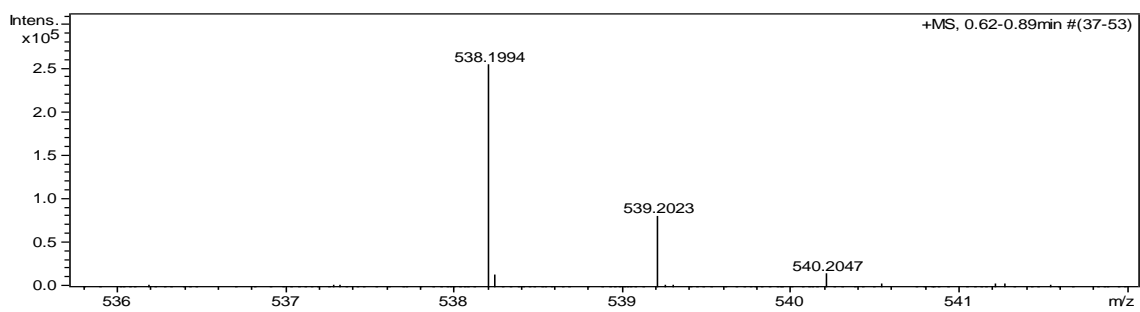

**6-(1-((Ethylperoxy)- $\lambda^2$ -methyl)-2,4-di-*o*-tolyl-9*H*-carbazol-3-yl)-3,4-dihydro-2*H*-pyran-2-one**

**(4b):**

yellow solid, 70%, m.p. 201-203 °C; <sup>1</sup>H NMR (400 MHz, CDCl<sub>3</sub>)  $\delta$ : 10.19 (s, 1H, NH), 7.48 (d, *J* = 8.4 Hz, 1H, ArH), 7.40-7.34 (m, 2H, ArH), 7.26-7.17 (m, 4H, ArH), 7.10-7.09 (m, 3H, ArH), 6.97 (t, *J* = 8.0 Hz, 1H, ArH), 6.88 (d, *J* = 8.0 Hz, 1H, ArH), 4.83 (d, *J* = 2.8 Hz, 1H, CH), 4.05 (q, *J* = 7.2 Hz, 2H, CH<sub>2</sub>), 2.40 (s, 3H, CH<sub>3</sub>), 2.34 (s, 3H, CH<sub>3</sub>), 1.95-1.87 (m, 2H, CH<sub>2</sub>), 1.81-1.70 (m, 2H, CH<sub>2</sub>), 0.82 (t, *J* = 7.2 Hz, 3H, CH<sub>3</sub>); <sup>13</sup>C NMR (400 MHz, CDCl<sub>3</sub>)  $\delta$ : 169.3, 168.2, 148.9, 141.6, 140.9, 140.5, 140.1, 138.4, 130.2, 129.6, 129.6, 128.4, 127.0, 126.5, 126.3, 126.1, 126.0, 125.6, 122.3, 119.8, 110.8, 108.4, 108.4, 60.5, 27.6, 21.4, 21.2, 18.7, 13.1; IR (KBr)  $\nu$ : 3471, 3055, 2961, 1832, 1740, 1655, 1637, 1583, 1471, 1350, 1301, 1261, 1185, 864, 768 cm<sup>-1</sup>; MS (*m/z*): HRMS (ESI) Calcd. for C<sub>34</sub>H<sub>29</sub>NO<sub>4</sub>([M+Na]<sup>+</sup>): 538.1989, found: 538.1982.

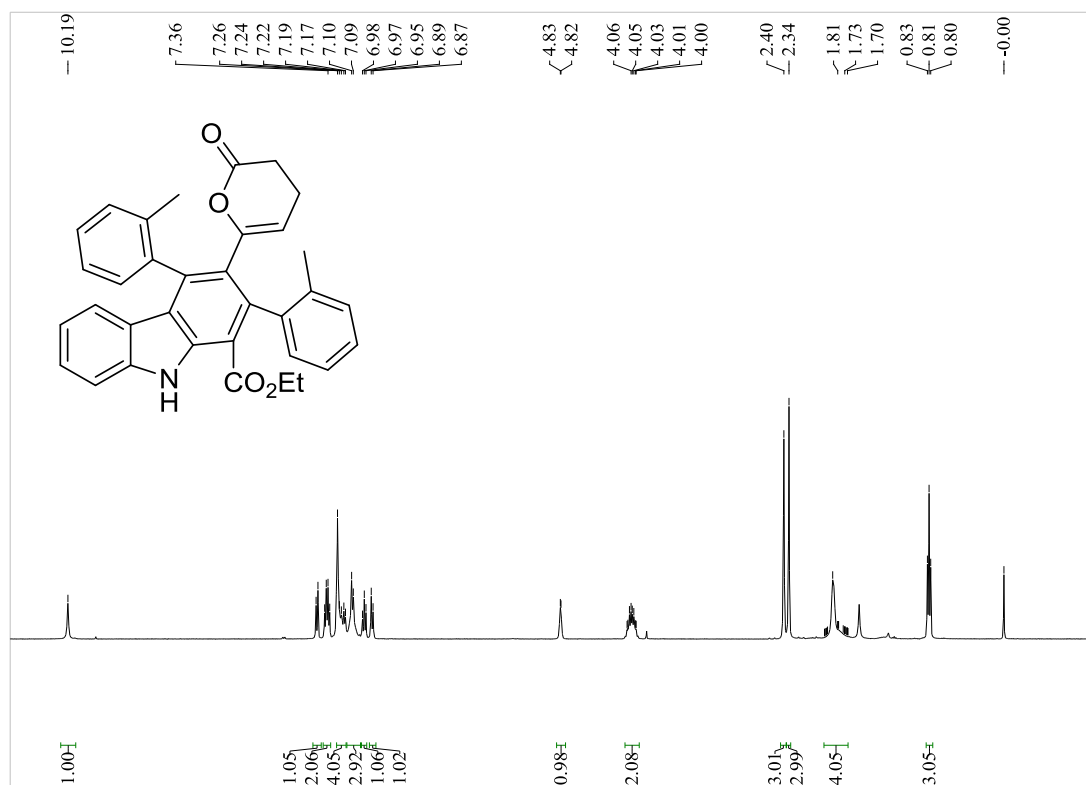

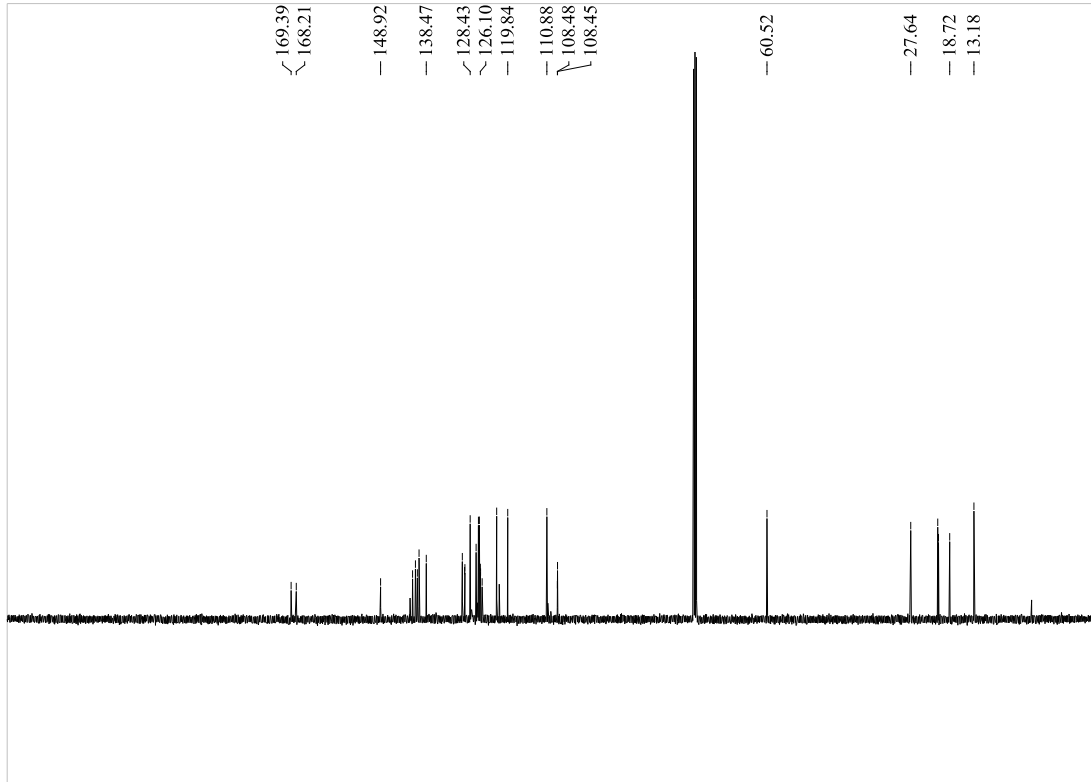

ZSC10\_20210130104340\_#53 RT: 0.67 AV: 1 NL: 1.48E+006  
 1280.538 [982 F (0.000-1500.0000)]  
 318.982 [1000 F (0.000-1500.0000)]  
 108.45 [1000 F (0.000-1500.0000)]  
 308.000 [1000 F (0.000-1500.0000)]

**6-(1-((Ethylperoxy)- $\lambda^2$ -methyl)-2,4-bis(4-methoxyphenyl)-9H-carbazol-3-yl)-3,4-dihydro-2H-pyran-2-one (4c):**

yellow solid, 61%, m.p. 206-209 °C;  $^1\text{H}$  NMR (400 MHz,  $\text{CDCl}_3$ )  $\delta$ : 10.16 (s, 1H, NH), 7.48 (d,  $J = 8.0$  Hz, 1H, ArH), 7.40-7.34 (m, 3H, ArH), 7.23-7.17 (m, 2H, ArH), 7.01 (d,  $J = 8.8$  Hz, 2H, ArH), 6.98-6.94 (m, 2H, ArH), 6.86 (d,  $J = 8.8$  Hz, 2H, ArH), 4.83-4.81 (m, 1H, CH), 4.07 (q,  $J = 7.2$  Hz, 2H,  $\text{CH}_2$ ), 3.91 (s, 3H,  $\text{OCH}_3$ ), 3.84 (s, 3H,  $\text{OCH}_3$ ), 1.92-1.90 (m, 4H, CH), 0.88 (t,  $J = 7.2$  Hz, 3H,  $\text{CH}_3$ );  $^{13}\text{C}$  NMR (400 MHz,  $\text{CDCl}_3$ )  $\delta$ : 169.3, 168.2, 159.1, 158.4, 149.1, 141.2, 140.5, 140.1, 133.5, 130.8, 130.4, 130.2, 126.3, 122.3, 119.8, 110.8, 108.1, 60.6, 55.3, 55.2, 27.7, 18.7, 13.4; IR (KBr)  $\nu$ : 3411, 3134, 2987, 1865, 1757, 1687, 1631, 1599, 1483, 1346, 1331, 1294, 1167, 887, 782  $\text{cm}^{-1}$ ; MS ( $m/z$ ): HRMS (ESI) Calcd. for  $\text{C}_{34}\text{H}_{29}\text{NO}_6$  ( $[\text{M}+\text{Na}]^+$ ): 570.1887, found: 570.1881.

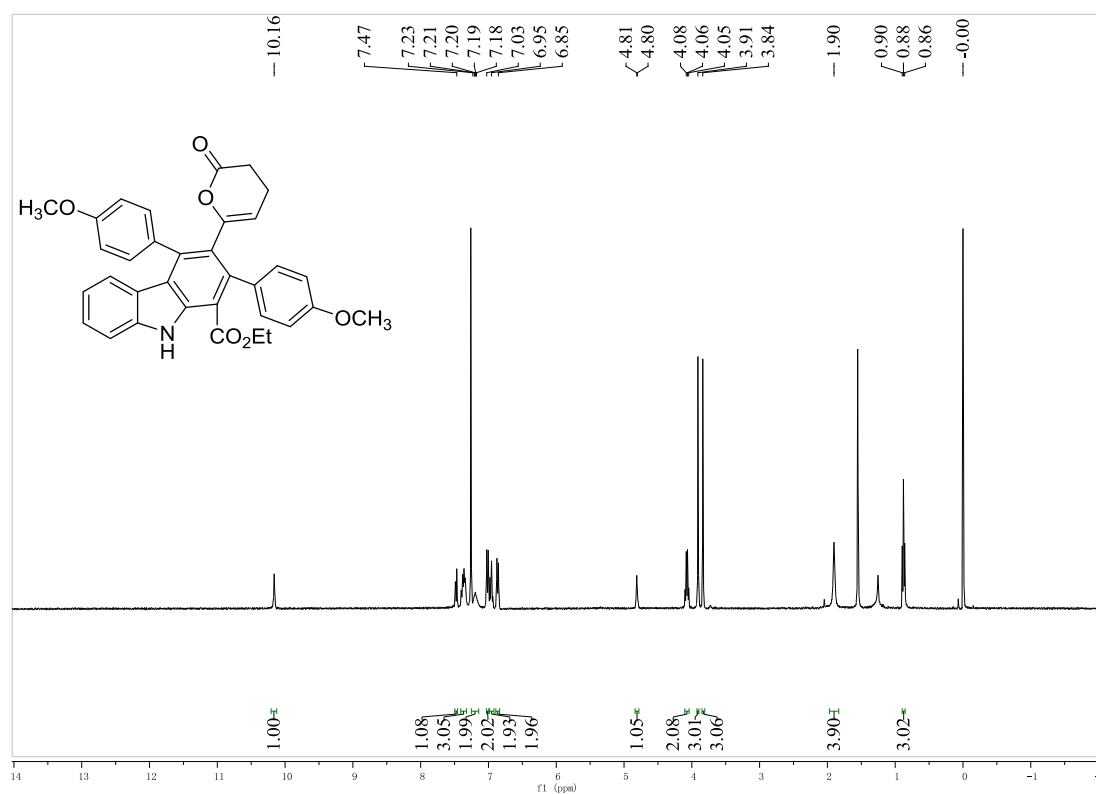

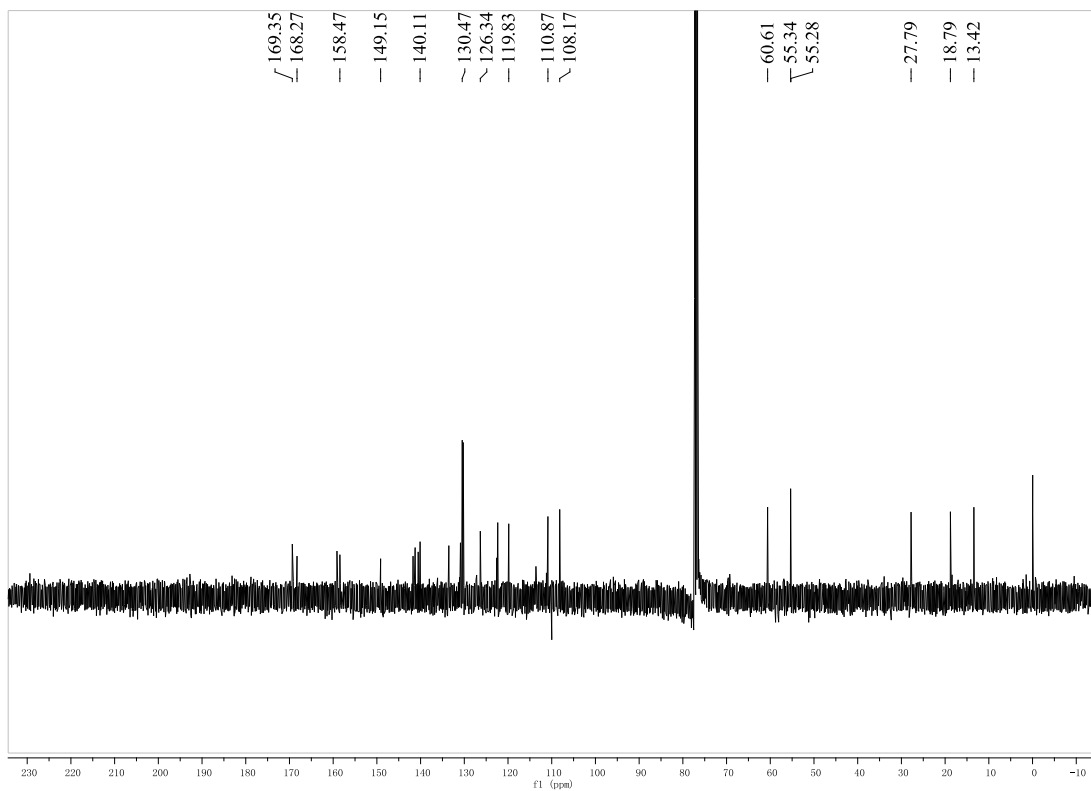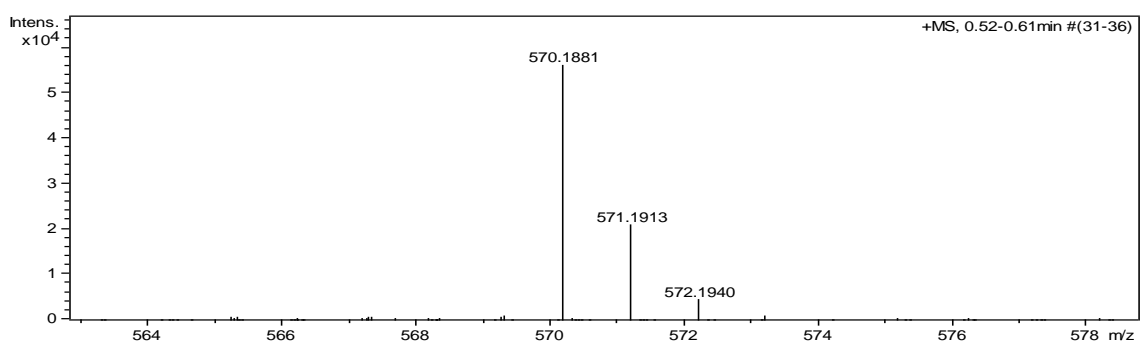

**6-(2,4-bis(4-chlorophenyl)-1-((ethylperoxy)- $\lambda^2$ -methyl)-9H-carbazol-3-yl)-3,4-dihydro-2H-pyran-2-one (4d):**

yellow solid, 54%, m.p. 217-220 °C;  $^1\text{H}$  NMR (400 MHz,  $\text{CDCl}_3$ )  $\delta$ : 10.28 (s, 1H, NH), 7.49 (t,  $J = 8.8$  Hz, 3H, ArH), 7.42 (t,  $J = 7.2$  Hz, 1H, ArH), 7.38 (d,  $J = 8.0$  Hz, 2H, ArH), 7.32 (d,  $J = 8.4$  Hz, 2H, ArH), 7.24-7.23 (m, 2H, ArH), 7.01 (t,  $J = 7.2$  Hz, 1H, ArH), 6.89 (d,  $J = 8.0$  Hz, 1H, ArH), 4.83-4.81 (m, 1H, CH), 4.08 (q,  $J = 7.2$  Hz, 2H,  $\text{CH}_2$ ), 1.92-1.91 (m, 4H, CH), 0.88 (t,  $J = 7.2$  Hz, 3H,  $\text{CH}_3$ );  $^{13}\text{C}$  NMR (400 MHz,  $\text{CDCl}_3$ )  $\delta$ : 168.6, 167.7, 148.4, 140.5, 140.5, 140.2, 140.0, 139.4, 136.8, 132.6, 130.7, 130.5, 128.6, 128.6, 127.0, 126.8, 125.5, 122.1, 122.0, 120.1, 111.1, 108.7, 60.9, 27.6, 18.7, 13.2; IR (KBr)  $\nu$ : 3465, 3038, 2973, 1844, 1787, 1667, 1612, 1567, 1455, 1382, 1345, 1277, 1162, 887, 792  $\text{cm}^{-1}$ ; MS ( $m/z$ ): HRMS (ESI) Calcd. for  $\text{C}_{32}\text{H}_{23}\text{Cl}_2\text{NO}_4$  ( $[\text{M}+\text{Na}]^+$ ): 578.0896, found: 578.0889.

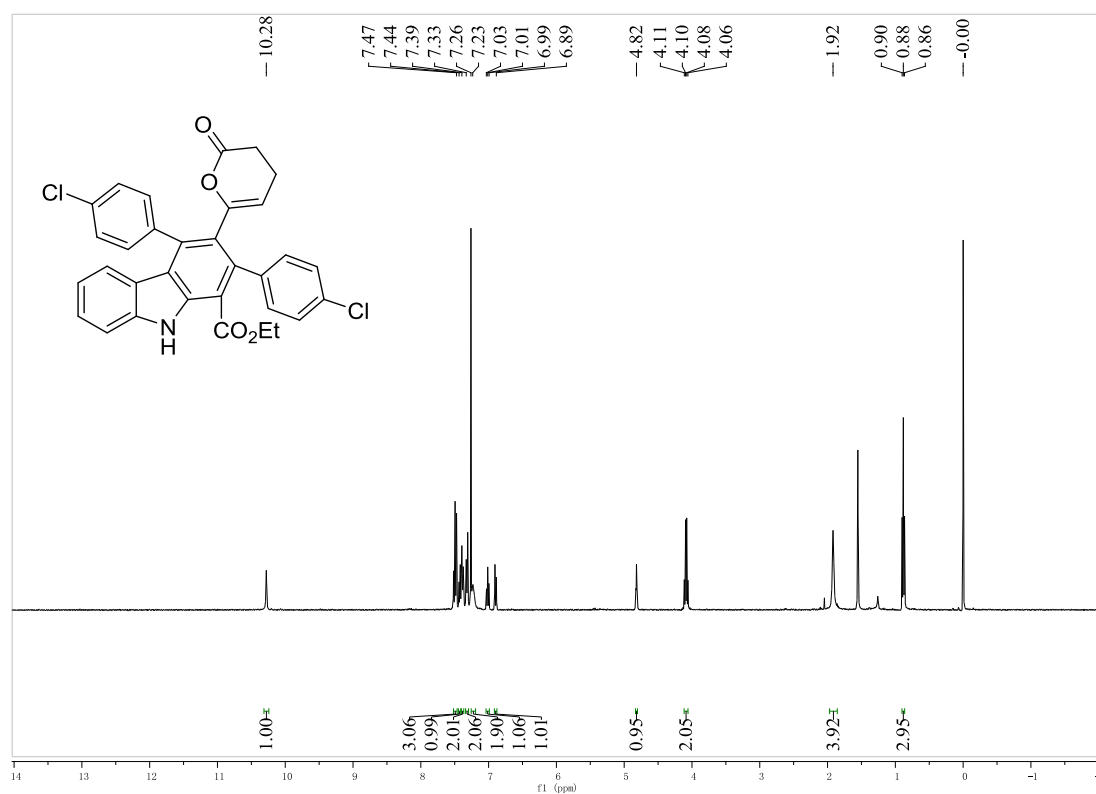



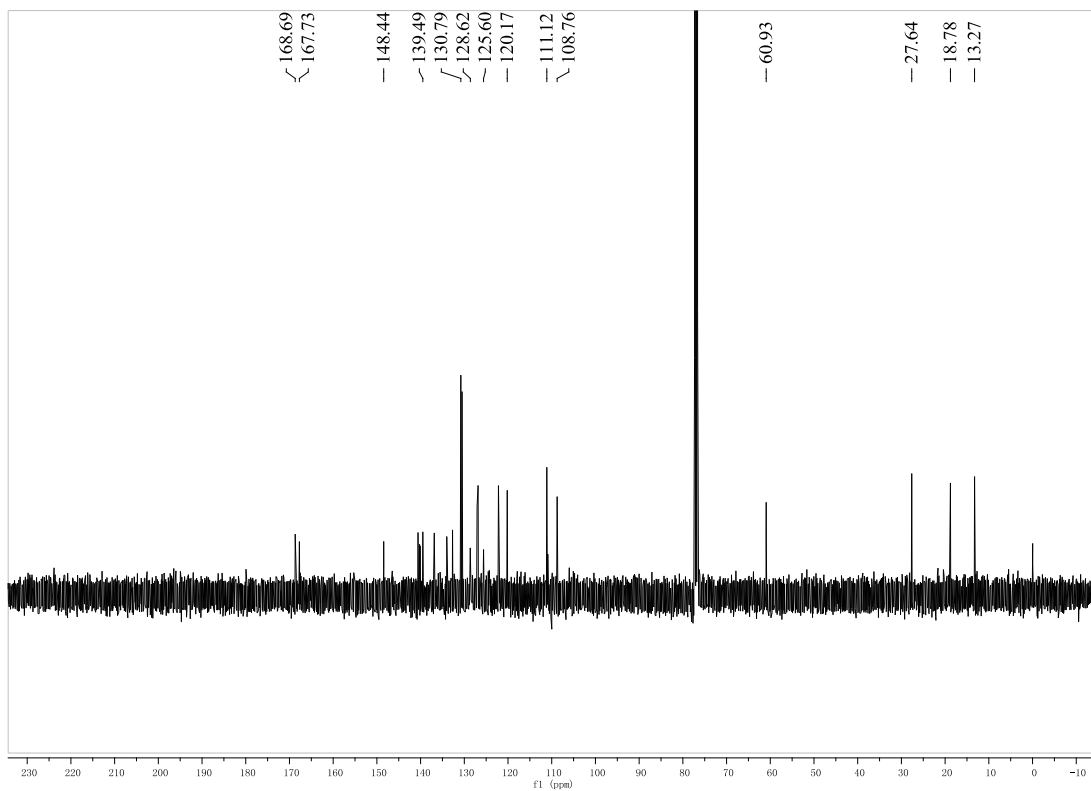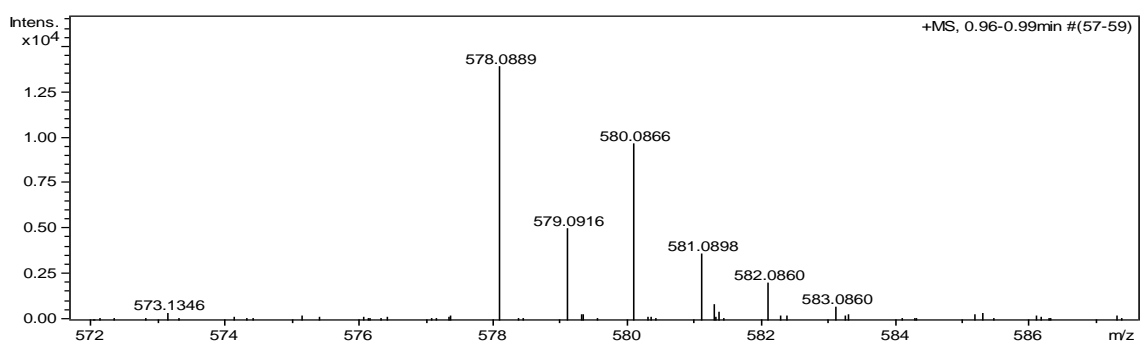

**6-(2,4-bis(3-chlorophenyl)-1-((ethylperoxy)- $\lambda^2$ -methyl)-9H-carbazol-3-yl)-3,4-dihydro-2H-pyran-2-one (4e):**

yellow solid, 62%, m.p. 198-200 °C;  $^1\text{H}$  NMR (400 MHz,  $\text{CDCl}_3$ )  $\delta$ : 10.32 (s, 1H, NH), 7.51 (d,  $J = 8.0$  Hz, 1H, ArH), 7.47-7.44 (m, 3H, ArH), 7.41 (d,  $J = 7.2$  Hz, 1H, ArH), 7.35 (d,  $J = 7.2$  Hz, 1H, ArH), 7.32-7.29 (m, 2H, ArH), 7.27-7.26 (m, 1H, ArH), 7.20-7.19 (m, 1H, ArH), 7.02 (t,  $J = 7.2$  Hz, 1H, ArH), 6.90 (d,  $J = 8.0$  Hz, 1H, ArH), 4.87 (d,  $J = 2.8$  Hz, 1H, CH), 4.09 (q,  $J = 7.2$  Hz, 2H,  $\text{CH}_2$ ), 1.98-1.93 (m, 2H,  $\text{CH}_2$ ), 1.93-1.91 (m, 2H,  $\text{CH}_2$ ), 0.87 (t,  $J = 7.2$  Hz, 3H,  $\text{CH}_3$ );  $^{13}\text{C}$  NMR (400 MHz,  $\text{CDCl}_3$ )  $\delta$ : 167.6, 148.2, 142.7, 140.2, 140.1, 139.7, 129.6, 129.4, 129.1, 129.0, 128.1, 127.6, 127.4, 127.3, 126.9, 126.7, 122.2, 120.2, 120.2, 111.1, 109.0, 60.8, 27.6, 18.7, 13.2; IR (KBr)  $\nu$ : 3456, 3044, 2957, 1871, 1788, 1667, 1654, 1531, 1487, 1368, 1341, 1266, 1132, 887, 768  $\text{cm}^{-1}$ ; MS ( $m/z$ ): HRMS (ESI) Calcd. for  $\text{C}_{32}\text{H}_{23}\text{Cl}_2\text{N}_3\text{O}_4$  ( $[\text{M}+\text{Na}]^+$ ): 578.0896, found: 578.0896.

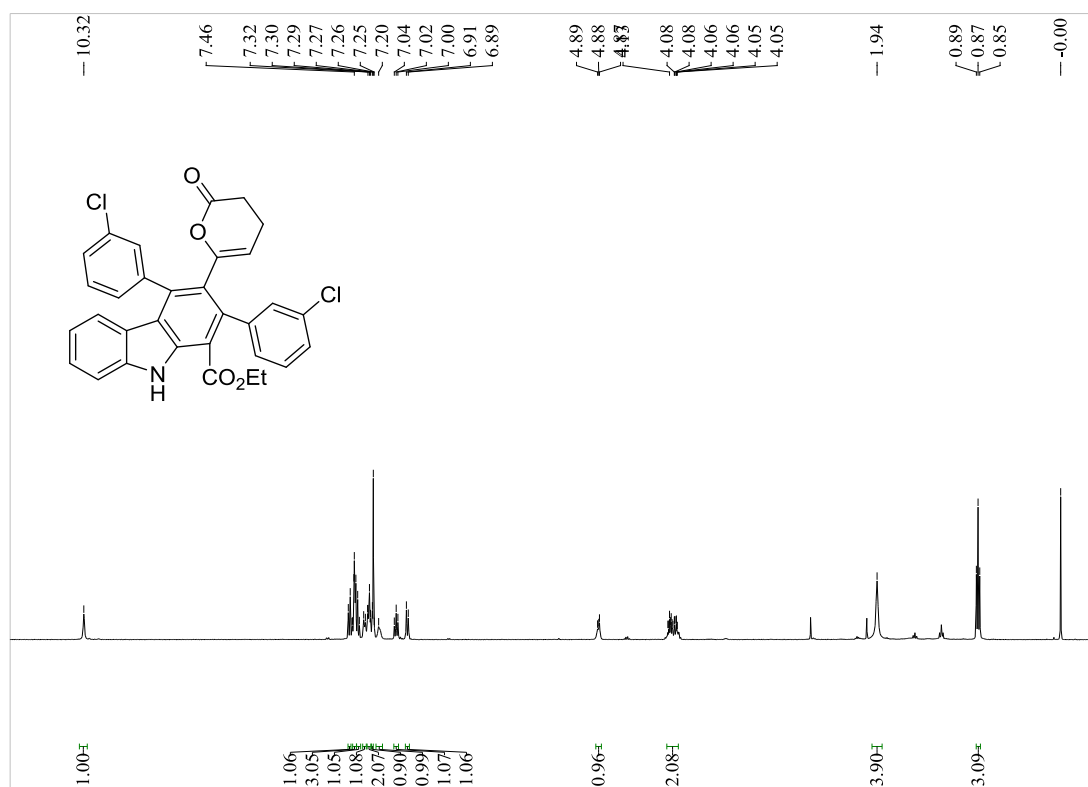

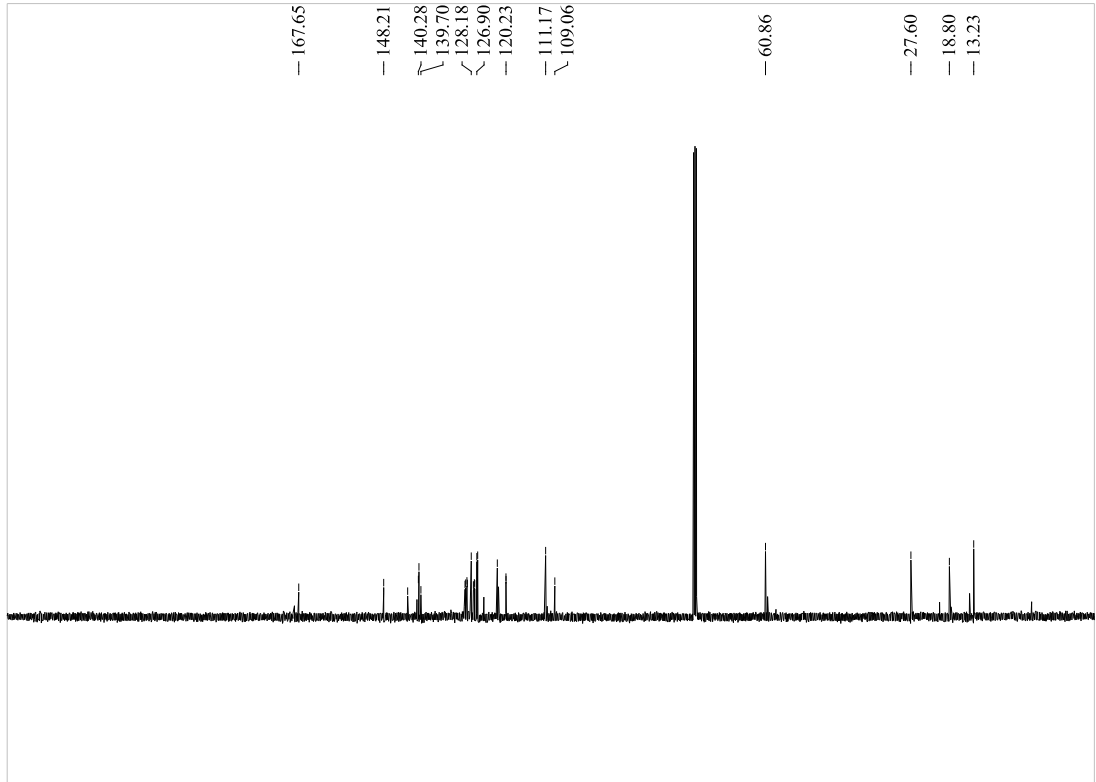

7560\_20210130104044 #14 RT: 0.17 AV: 1 NL: 3.35E+005  
12837.1929 S1 Full.ms [100.0000-1500.0000]  
3000500060500 4433189145  
3000500060500 4433189145

**6-(1-((Ethylperoxy)- $\lambda^2$ -methyl)-2,4-di-*p*-tolyl-9*H*-carbazol-3-yl)-4,4-dimethyl-3,4-dihydro-2*H*-pyran-2-one (4f):**

yellow solid, 63%, m.p. 200-203 °C;  $^1\text{H}$  NMR (400 MHz,  $\text{CDCl}_3$ )  $\delta$ : 10.20 (s, 1H, NH), 7.47 (d,  $J = 8.0$  Hz, 1H, ArH), 7.40-7.36 (m, 1H, ArH), 7.27-7.26 (m, 5H, ArH), 7.11-7.10 (m, 3H, ArH), 6.97 (d,  $J = 8.0$  Hz, 2H, ArH), 4.59 (s, 1H, CH), 4.06 (q,  $J = 7.2$  Hz, 2H,  $\text{CH}_2$ ), 2.45 (s, 3H,  $\text{CH}_3$ ), 2.36 (s, 3H,  $\text{CH}_3$ ), 1.72-1.70 (m, 1H, CH), 1.69-1.68 (m, 1H, CH), 0.83 (t,  $J = 7.2$  Hz, 3H,  $\text{CH}_3$ ), 0.61 (s, 3H,  $\text{CH}_3$ ), 0.60 (s, 3H,  $\text{CH}_3$ );  $^{13}\text{C}$  NMR (400 MHz,  $\text{CDCl}_3$ )  $\delta$ : 169.2, 168.1, 146.0, 142.1, 141.5, 140.5, 140.0, 138.1, 137.3, 135.9, 135.5, 129.2, 128.9, 126.3, 122.5, 122.3, 121.7, 119.7, 119.2, 110.8, 60.6, 42.2, 30.8, 21.3, 21.1, 13.2; IR (KBr)  $\nu$ : 3431, 3055, 2918, 1865, 1753, 1667, 1653, 1587, 1472, 1350, 1368, 1250, 1138, 862, 755  $\text{cm}^{-1}$ ; MS ( $m/z$ ): HRMS (ESI) Calcd. for  $\text{C}_{36}\text{H}_{33}\text{NO}_4$  ( $[\text{M}+\text{Na}]^+$ ): 566.2302, found: 566.2297.

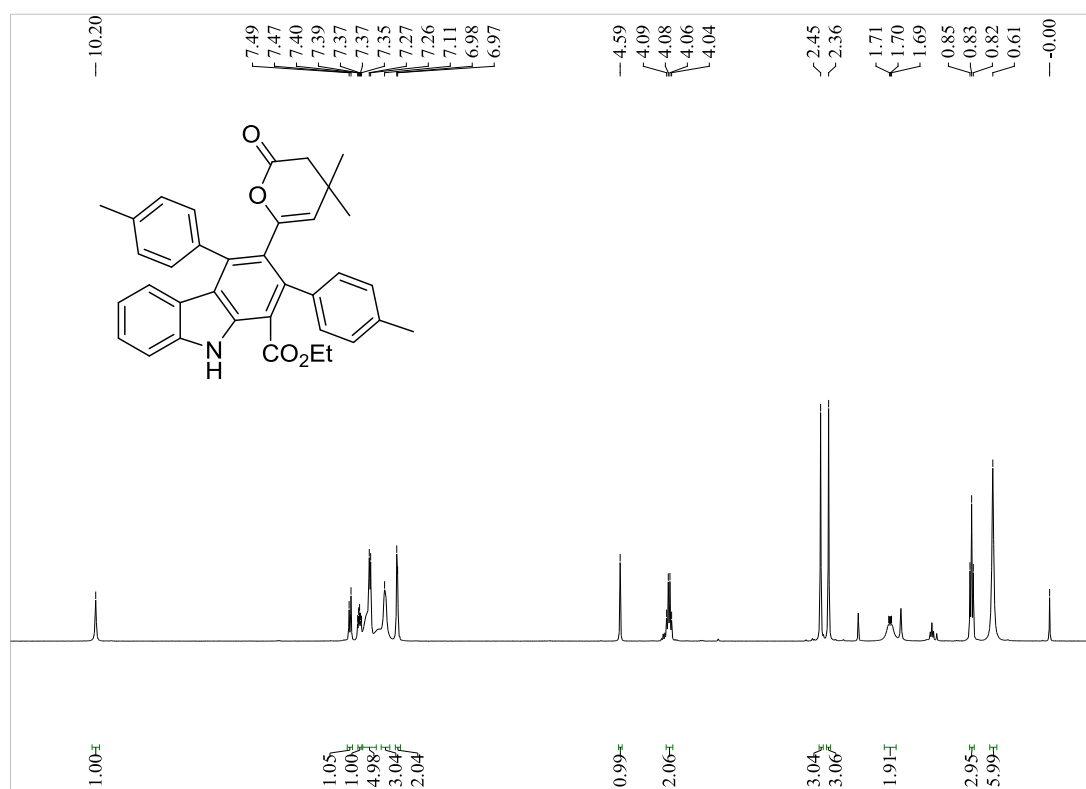



**6-(2,4-Bis(3-chlorophenyl)-1-((ethylperoxy)- $\lambda^2$ -methyl)-9H-carbazol-3-yl)-4,4-dimethyl-3,4-dihydro-2H-pyran-2-one (4g):**

yellow solid, 51%, m.p. 205-207 °C;  $^1\text{H}$  NMR (400 MHz,  $\text{CDCl}_3$ )  $\delta$ : 10.35 (s, 1H, NH), 7.51 (d,  $J = 8.0$  Hz, 1H, ArH), 7.47-7.36 (m, 6H, ArH), 7.30 (d,  $J = 8.0$  Hz, 2H, ArH), 7.19-7.17 (m, 1H, ArH), 7.05-6.98 (m, 2H, ArH), 4.66 (s, 1H, CH), 4.09 (q,  $J = 7.2$  Hz, 2H,  $\text{CH}_2$ ), 1.82-1.76 (m, 1H, CH), 1.75-1.74 (m, 1H, CH), 0.88 (t,  $J = 7.2$  Hz, 3H,  $\text{CH}_3$ ), 0.71 (s, 3H,  $\text{CH}_3$ ), 0.64 (s, 3H,  $\text{CH}_3$ );  $^{13}\text{C}$  NMR (400 MHz,  $\text{CDCl}_3$ )  $\delta$ : 168.3, 167.5, 142.7, 140.6, 140.3, 140.1, 140.0, 139.6, 129.7, 129.3, 128.0, 127.9, 127.6, 127.4, 126.9, 126.5, 125.2, 122.2, 121.9, 120.2, 120.0, 111.2, 60.8, 42.2, 31.0, 13.2; IR (KBr)  $\nu$ : 3445, 3017, 2955, 1871, 1764, 1682, 1638, 1538, 1447, 1381, 1322, 1286, 1131, 855, 763  $\text{cm}^{-1}$ ; MS ( $m/z$ ): HRMS (ESI) Calcd. for  $\text{C}_{34}\text{H}_{27}\text{Cl}_2\text{NO}_4$  ( $[\text{M}+\text{Na}]^+$ ): 606.1209, found: 606.1202.

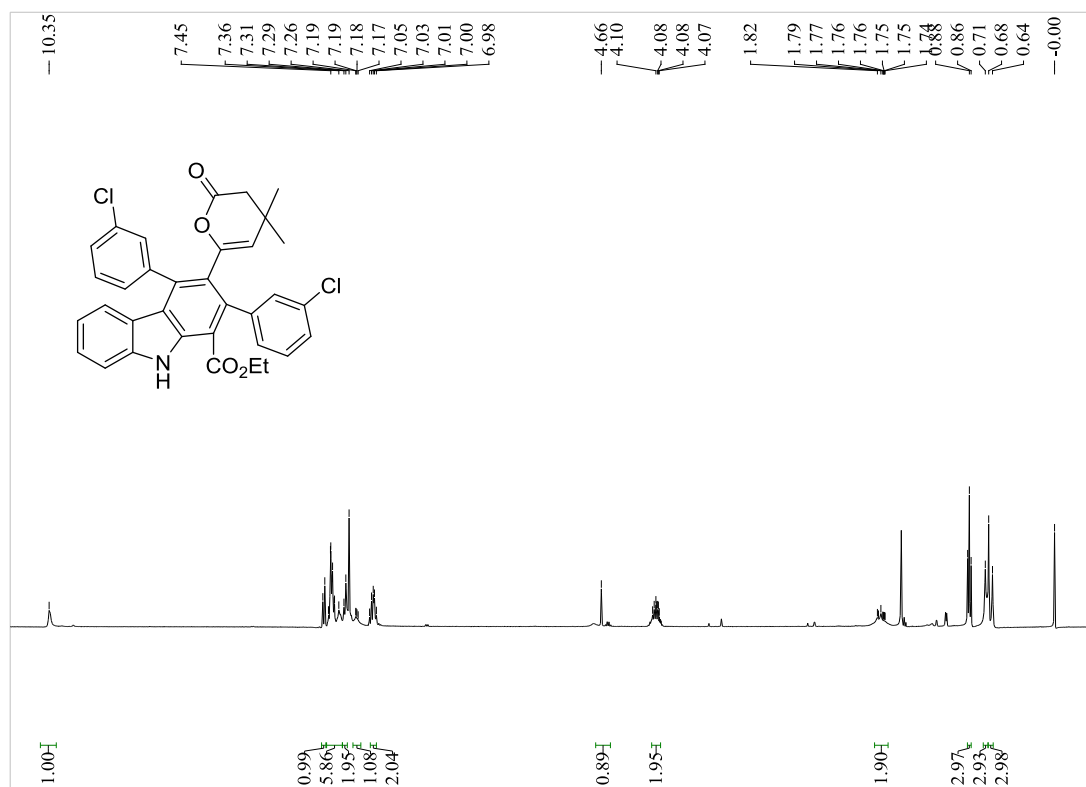

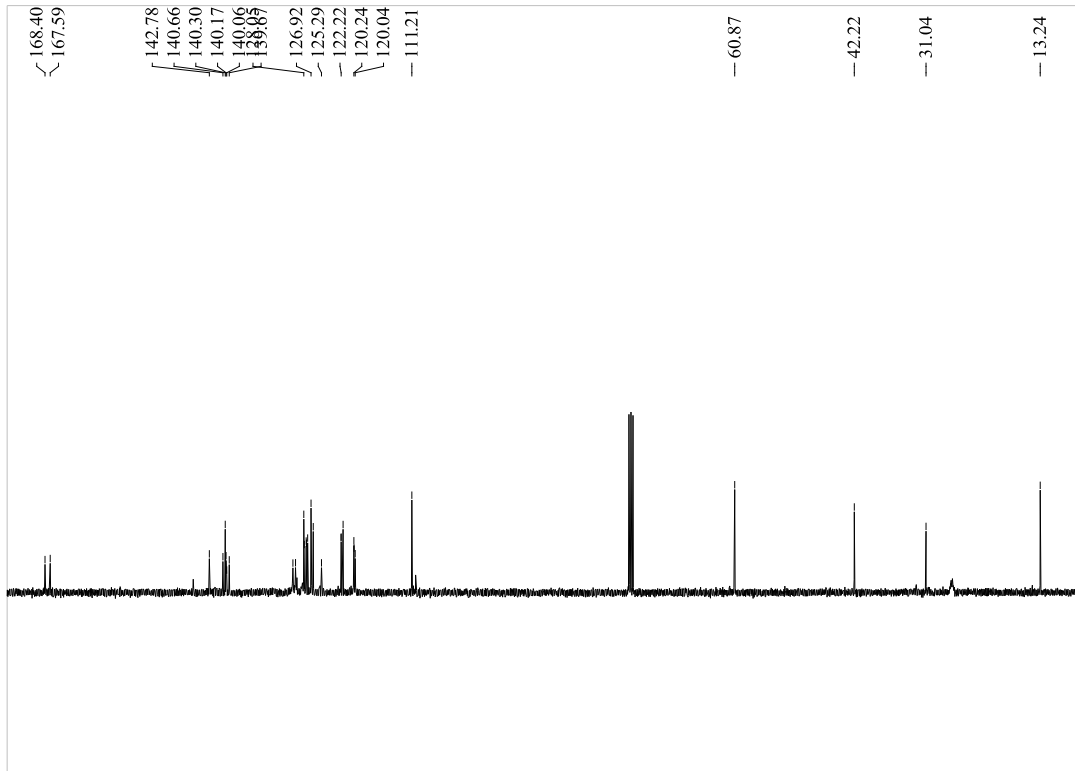

Supplement: d1ob01113h1.pdf [file d1ob01113h1.pdf]
